# Supplementary material
Source: ML conference proceedings conference paper supplement (https://openreview.net/forum?id=sFjxg8cyJS)
Supplement: supplementary_material [file shiftdifferences.pdf › code/realworld/results/hyperparamsetting_besthps/shiftdifferences.pdf]

### In-domain: Avg. Over Datasets

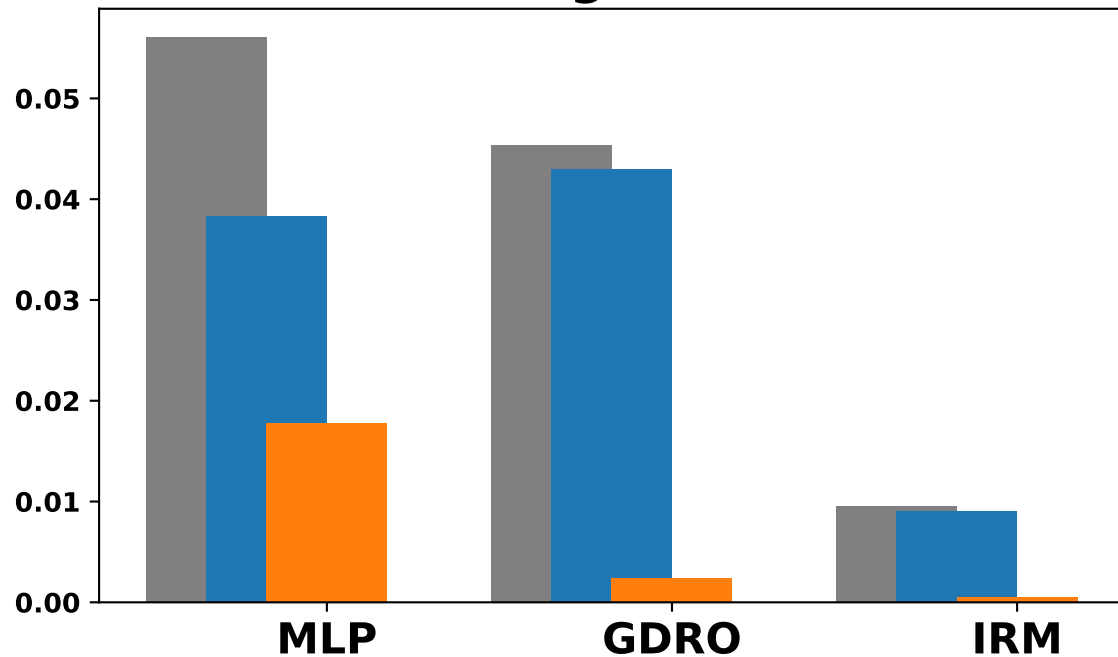

### Out-of-domain: Avg. Over Datasets

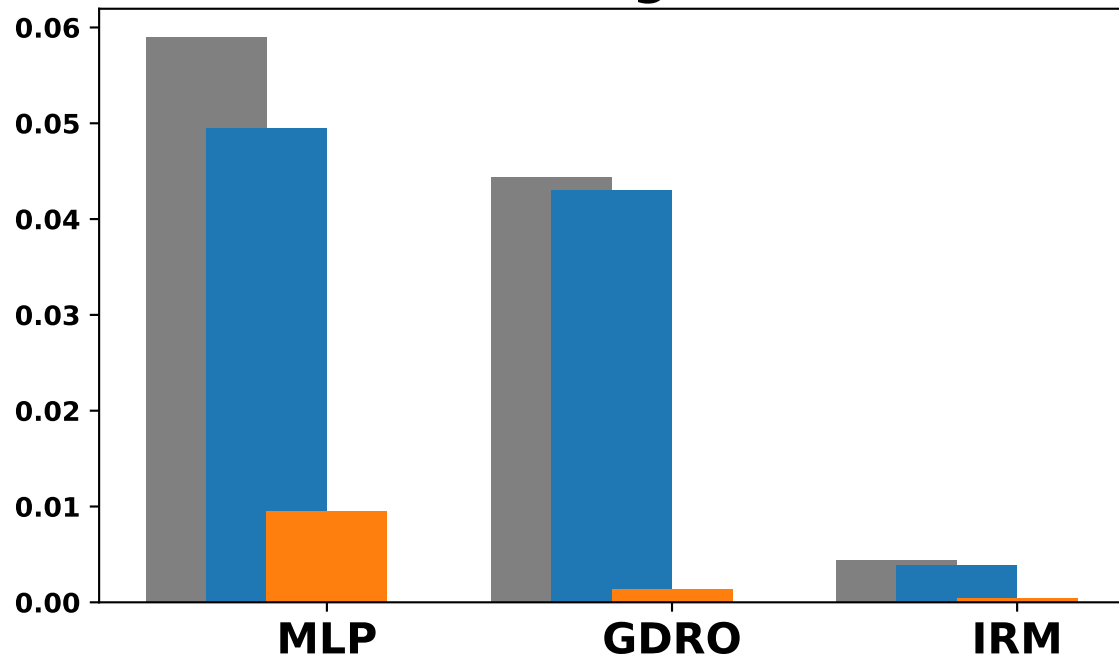

**Predictive information**  
**Conditional informativeness - Residual**

$$-\frac{\text{Variation}}{2} + \frac{\text{Label shift}}{2} + \frac{\text{Feature shift}}{2} - \frac{\text{Concept shift}}{2}$$
