# Supplementary material
Source: ML conference proceedings conference paper supplement (https://openreview.net/forum?id=sFjxg8cyJS)
Supplement: supplementary_material [file shiftmeasures_xgb_multiplesamplesizes.pdf › code/realworld/results/informative/shiftmeasures_xgb_multiplesamplesizes.pdf]

ID, acsincome dataset, XGB model

OOD, acsincome dataset, XGB model

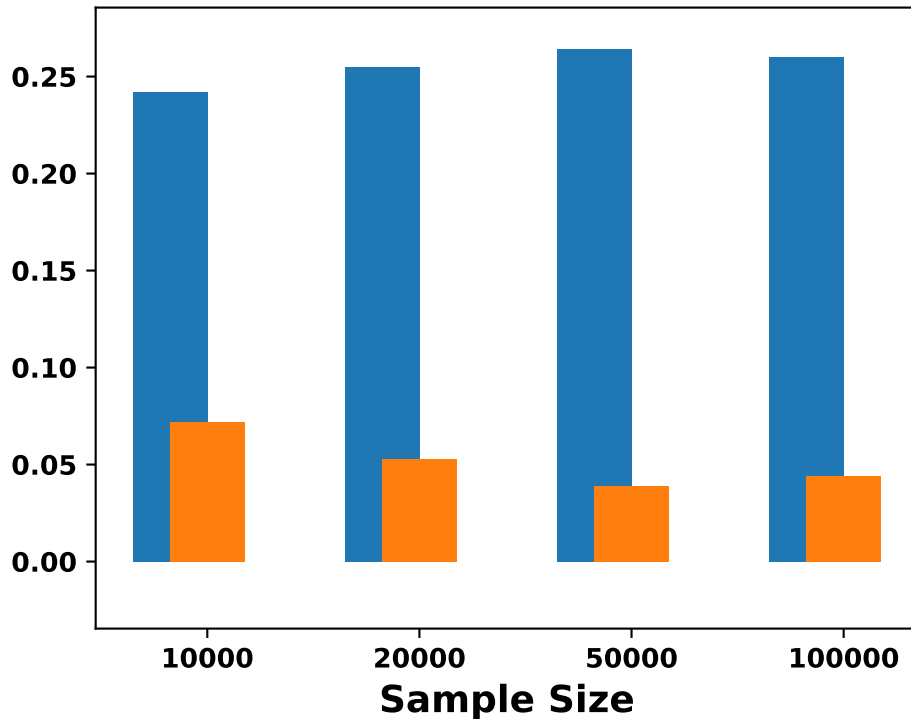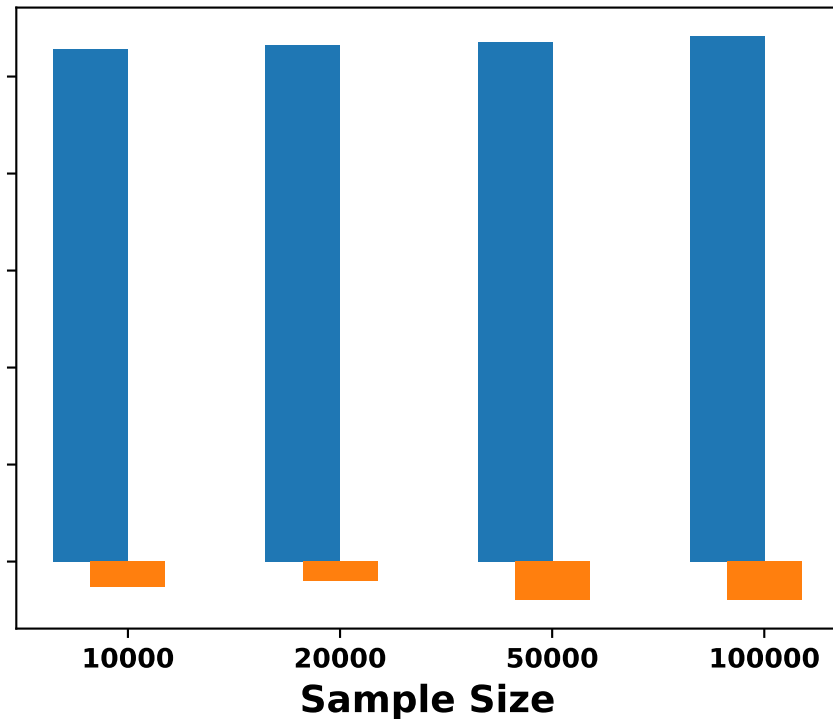

CI - Res

$-\frac{\text{Var}}{2} + \frac{\text{LS}}{2} + \frac{\text{FS}}{2} - \frac{\text{CS}}{2}$
