# Supplementary material
Source: ML conference proceedings conference paper supplement (https://openreview.net/forum?id=sFjxg8cyJS)

# Structural Equations :

(Hidden Confounder)  $U \sim \mathcal{N}(\mu_e, 0.5^2)$

$\mu_e \in \{-1, 0\}$  for ID

$\mu_e \in \{-0.5, 0.5\}$  for OOD

(Input)  $X = 0.75 U + \mathcal{N}(0, 1.5^2)$

(Outcome)  $Y = X^2 - 3U + \mathcal{N}(0, 0.5^2)$

(Informative)  $X_i = 0.6 U + \mathcal{N}(0, 0.3^2)$

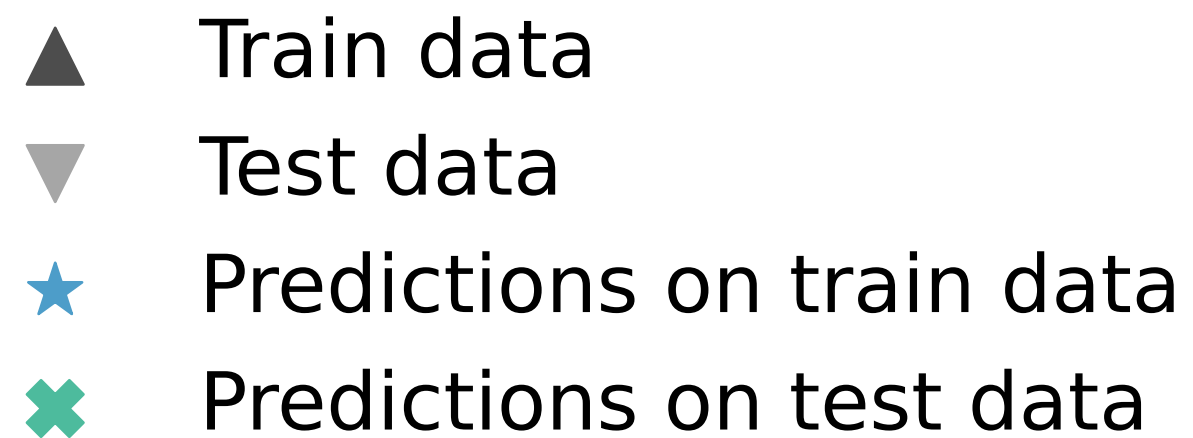

MLP Using X  
Train MSE: 4.7  
Test MSE: 6.6

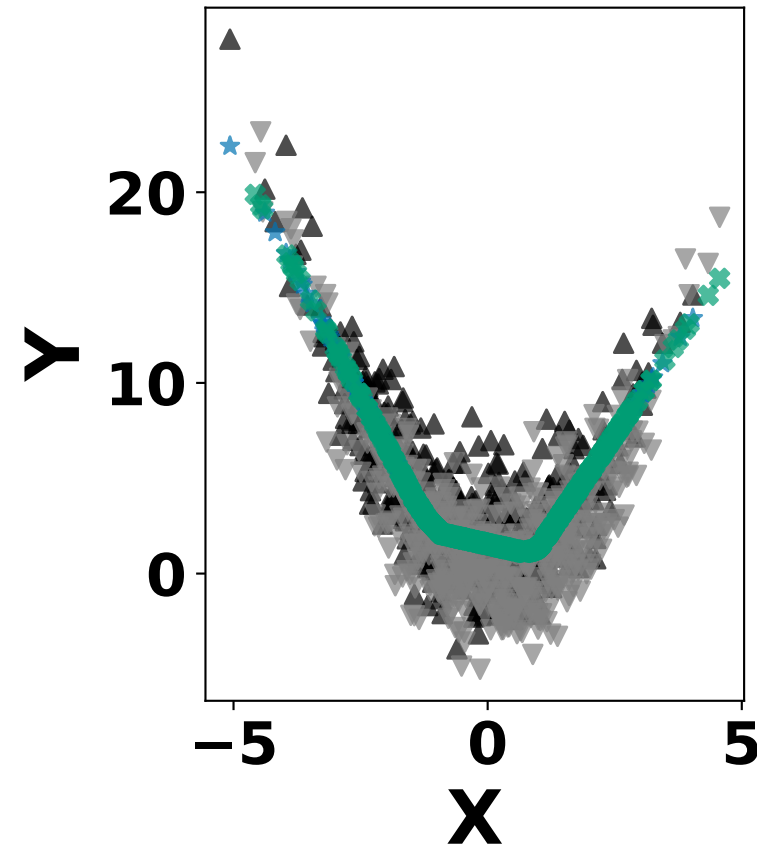

MLP Using X, E  
Train MSE: 3.5  
Test MSE: 4.6

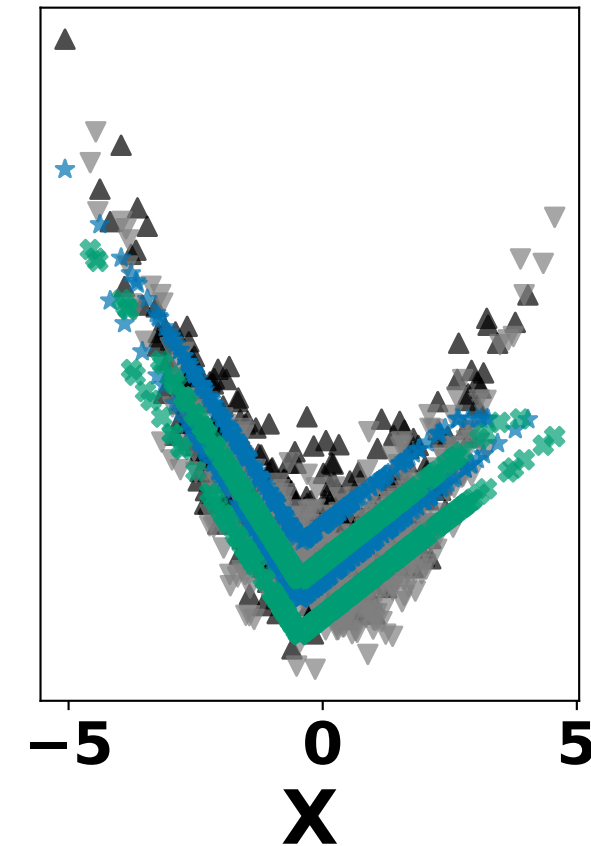

MLP Using X, X<sub>i</sub>  
Train MSE: 1.9  
Test MSE: 2.5

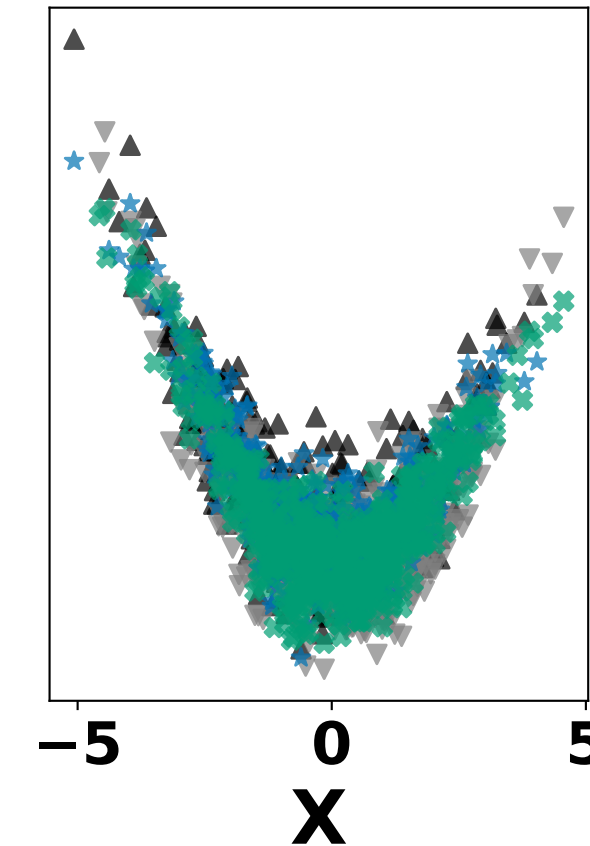

MLP Using X, U (Oracle)  
Train MSE: 0.4  
Test MSE: 0.5

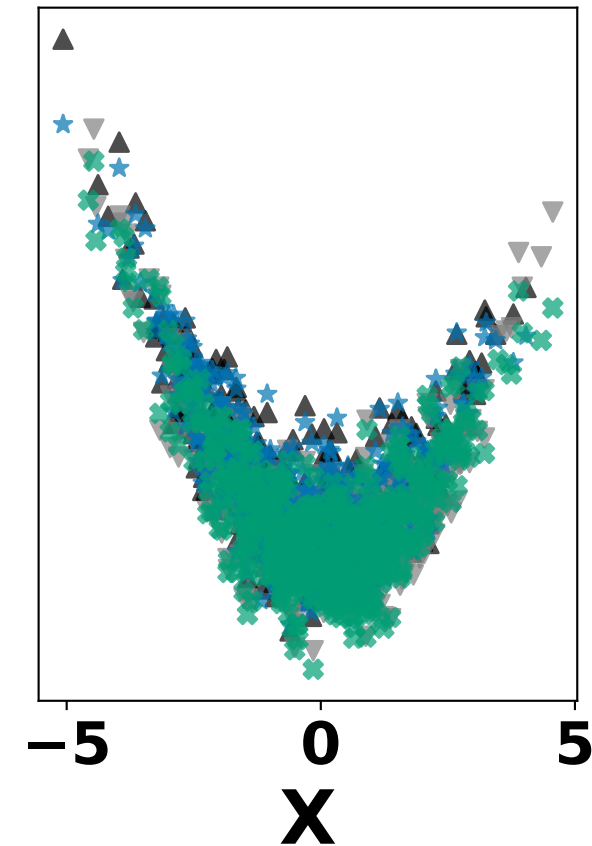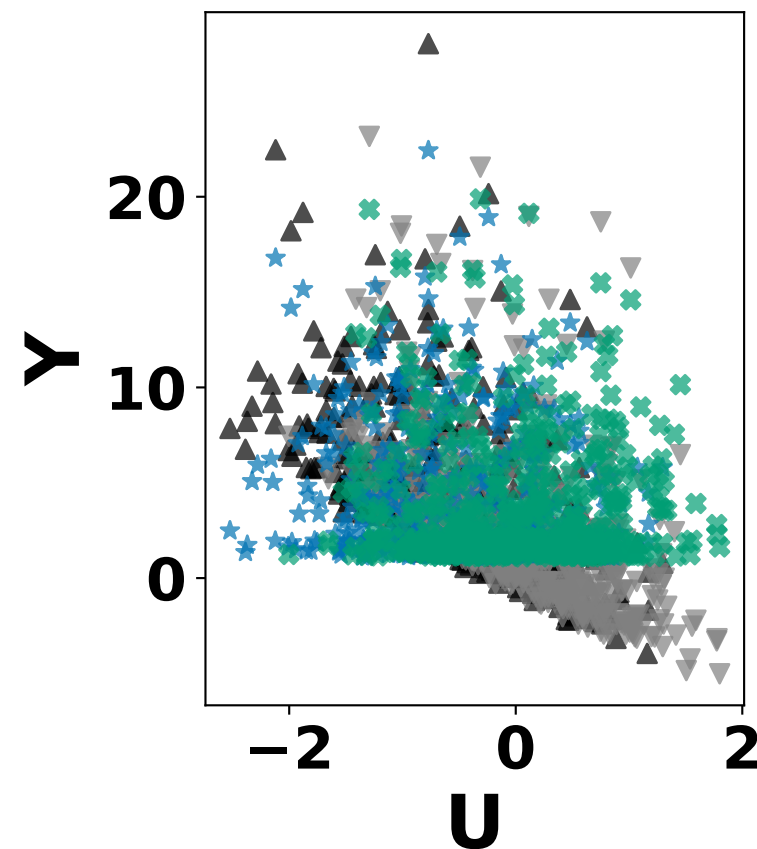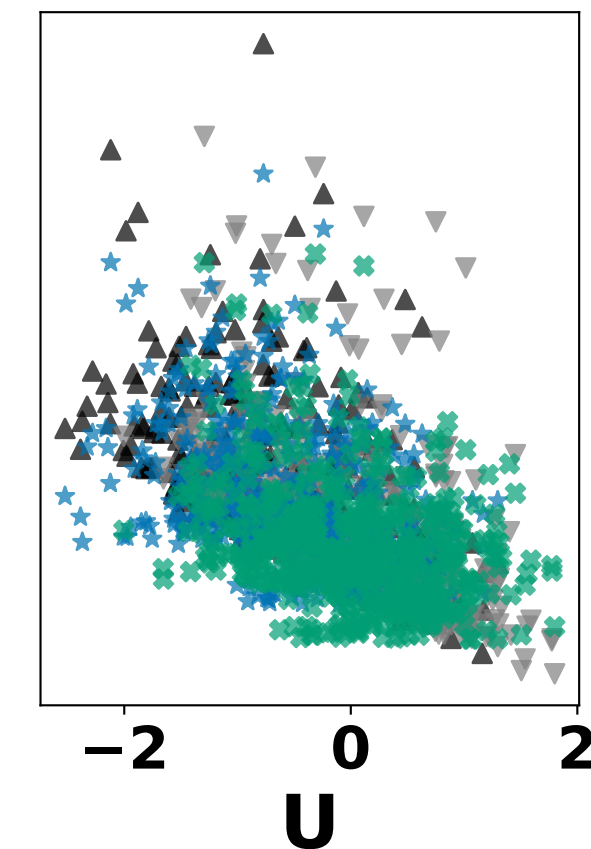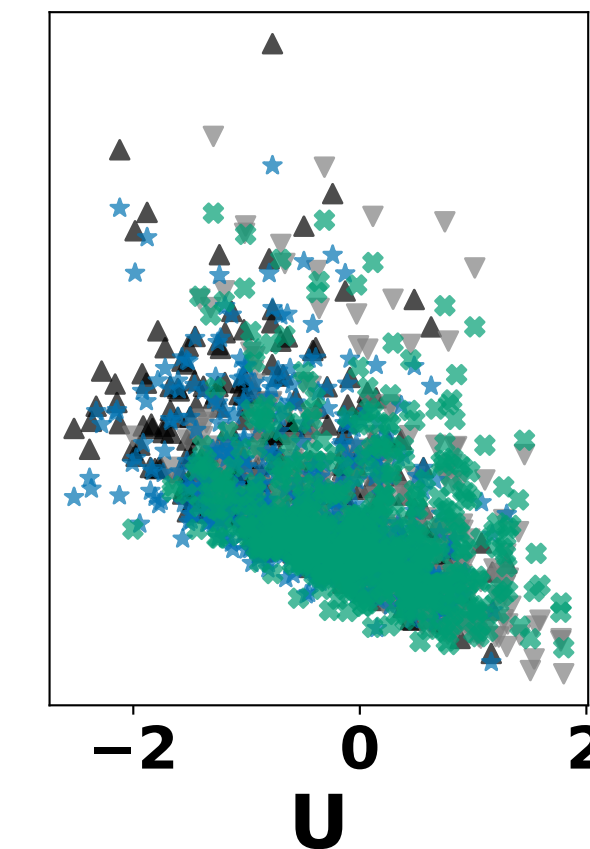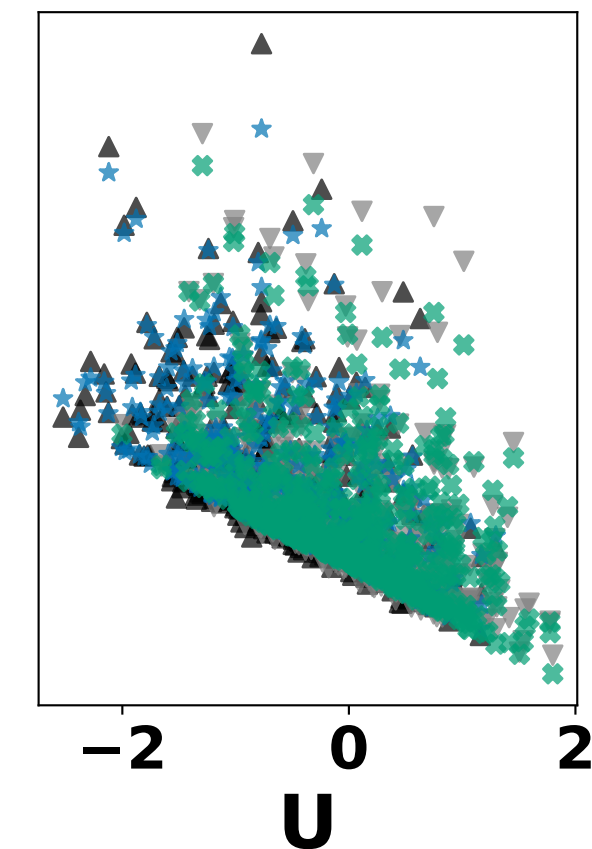

Supplement: supplementary_material [file synthetic_mlp_highoverlap.pdf › code/synthetic/results/synthetic_mlp_highoverlap.pdf]
