# Supplementary material
Source: ML conference proceedings conference paper supplement (https://openreview.net/forum?id=sFjxg8cyJS)

# Structural Equations :

(Hidden Confounder)  $U \sim \mathcal{N}(\mu_e, 0.5^2)$

$\mu_e \in \{-2, 2\}$  for ID

$\mu_e \in \{0, 4\}$  for OOD

(Input)  $X = 0.75 U + \mathcal{N}(0, 1.5^2)$

(Outcome)  $Y = X^2 - 3 U + \mathcal{N}(0, 0.5^2)$

(Informative)  $X_i = 0.6 U + \mathcal{N}(0, 0.3^2)$

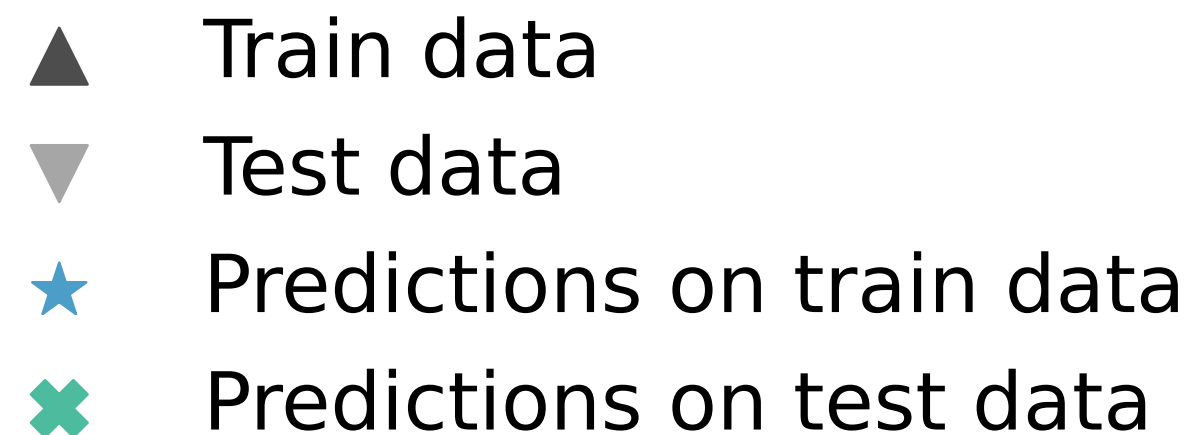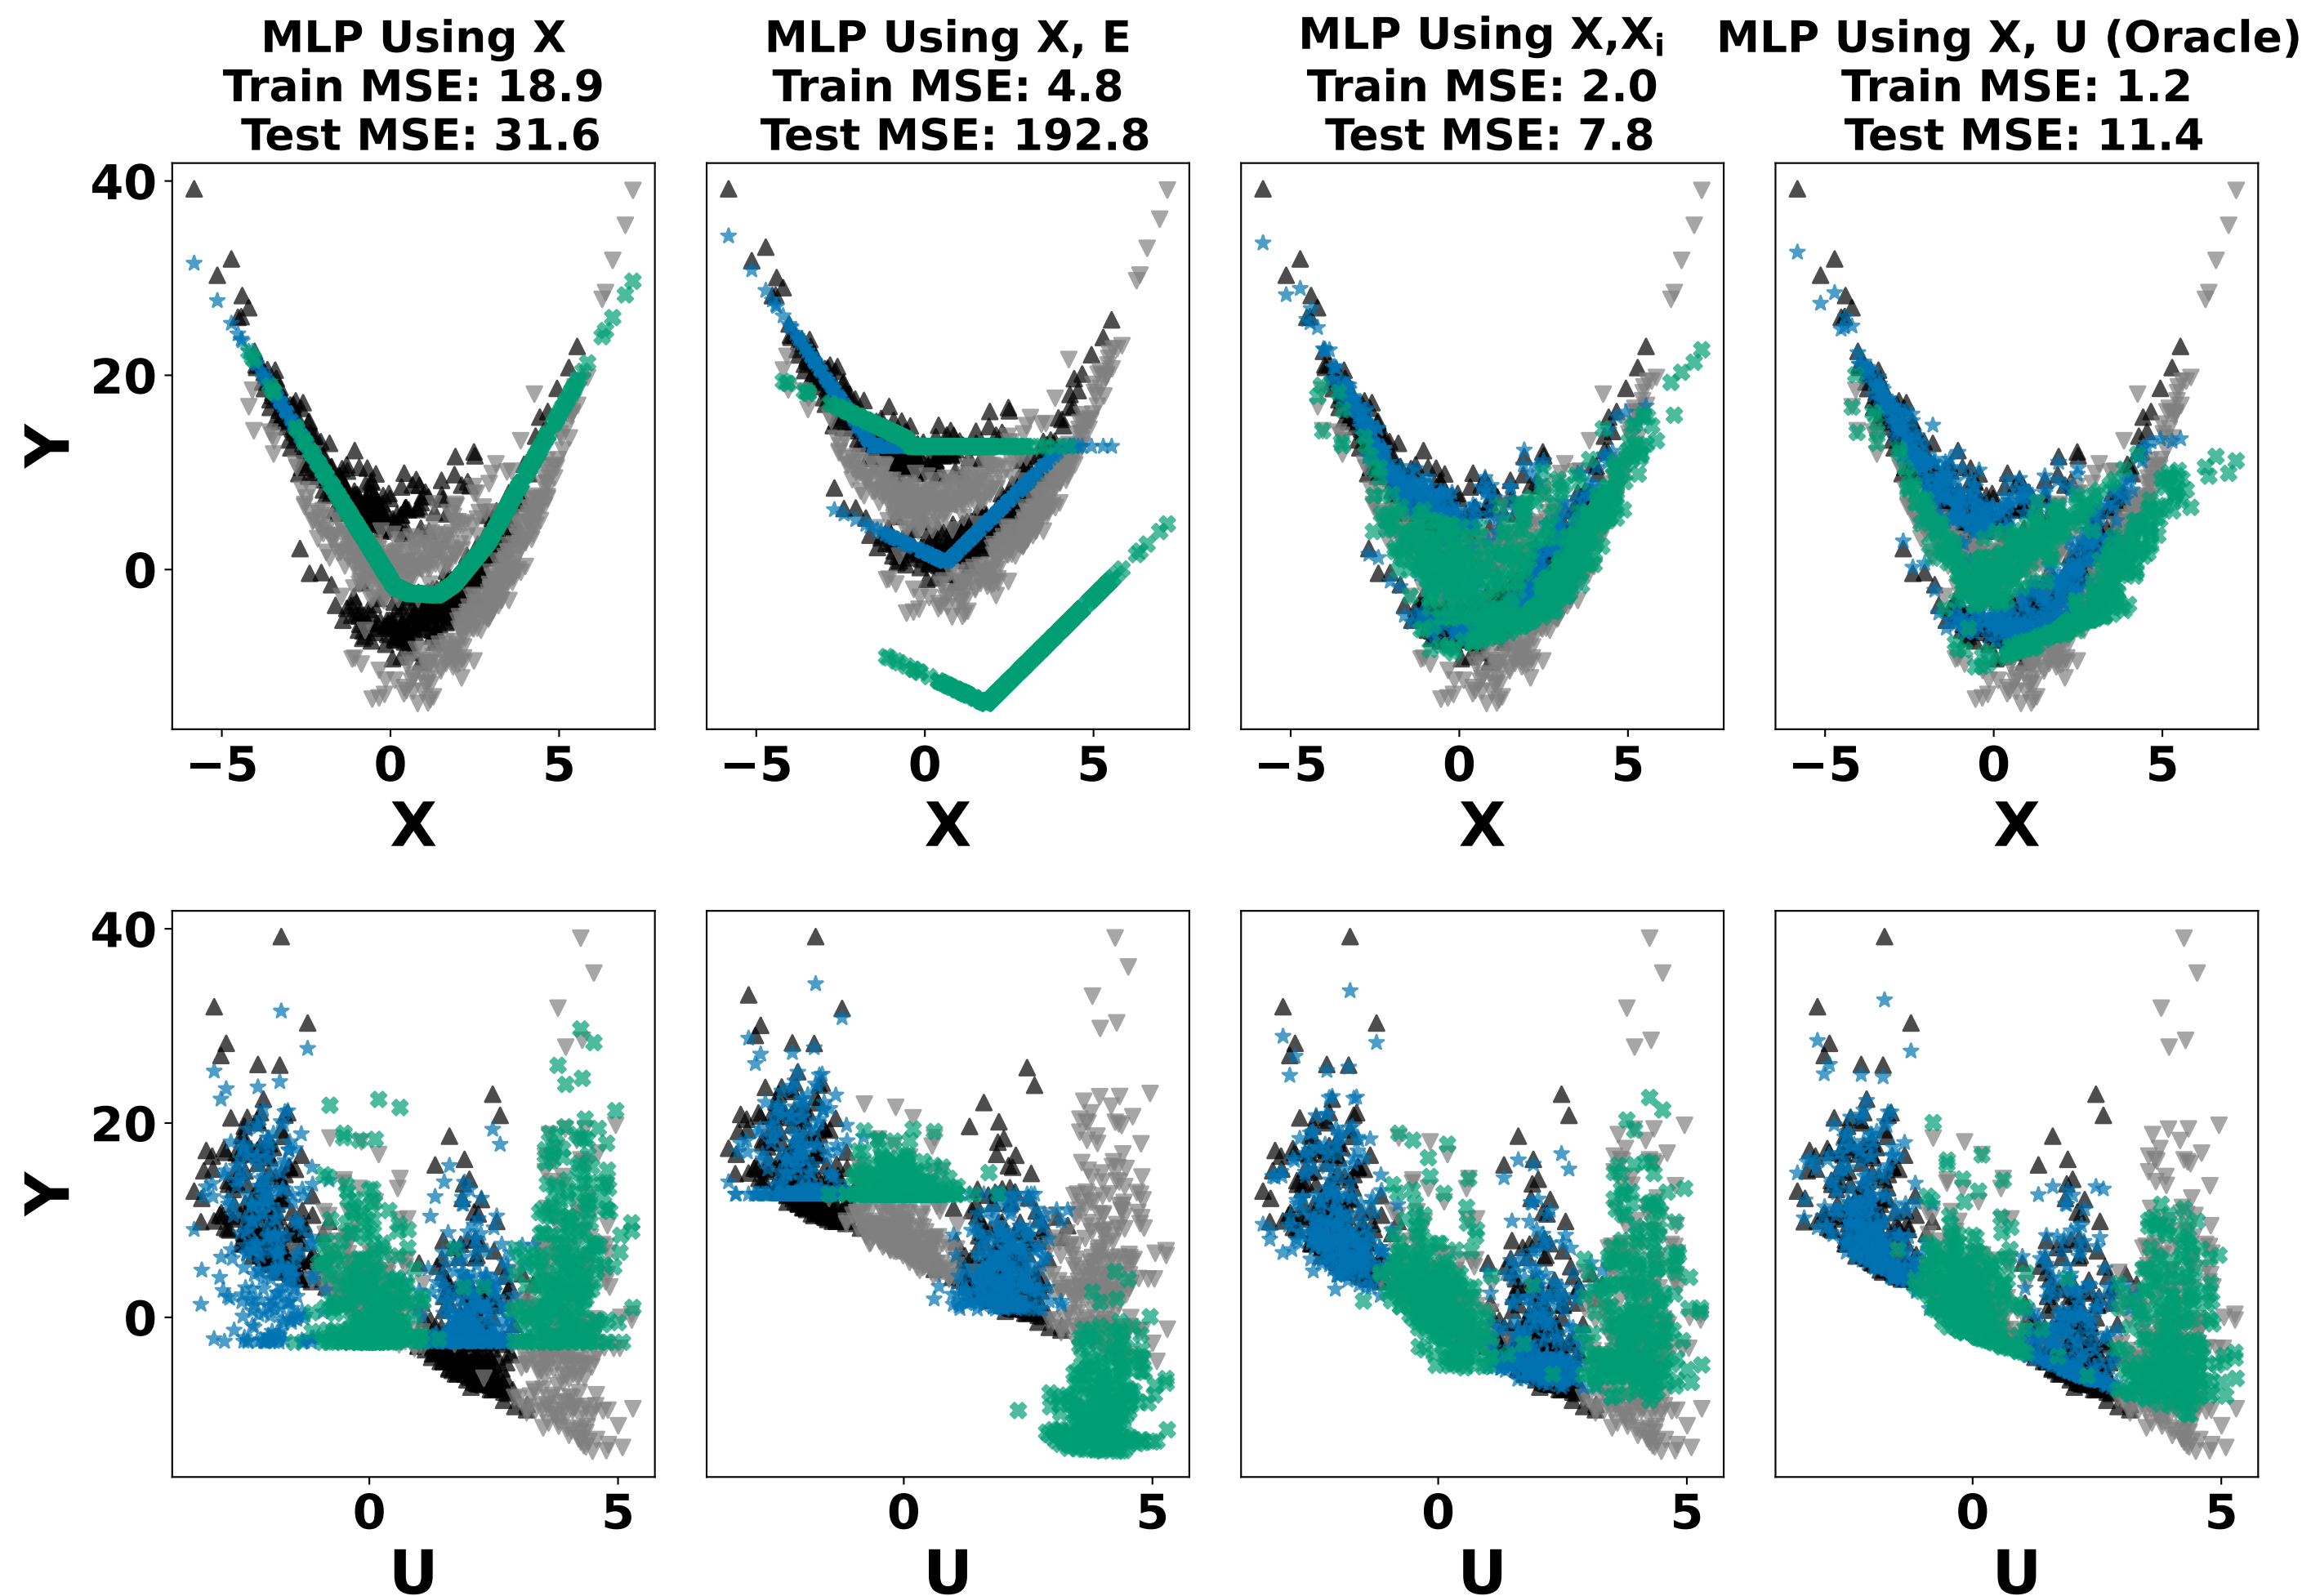

Supplement: supplementary_material [file synthetic_mlp_lowoverlap.pdf › code/synthetic/results/synthetic_mlp_lowoverlap.pdf]
