# Supplementary material
Source: ML conference proceedings conference paper supplement (https://openreview.net/forum?id=sFjxg8cyJS)
Supplement: supplementary_material [file test_shiftdifferences_datasets.pdf › code/realworld/results/informative/test_shiftdifferences_datasets.pdf]

# Test Environments

## Readmission

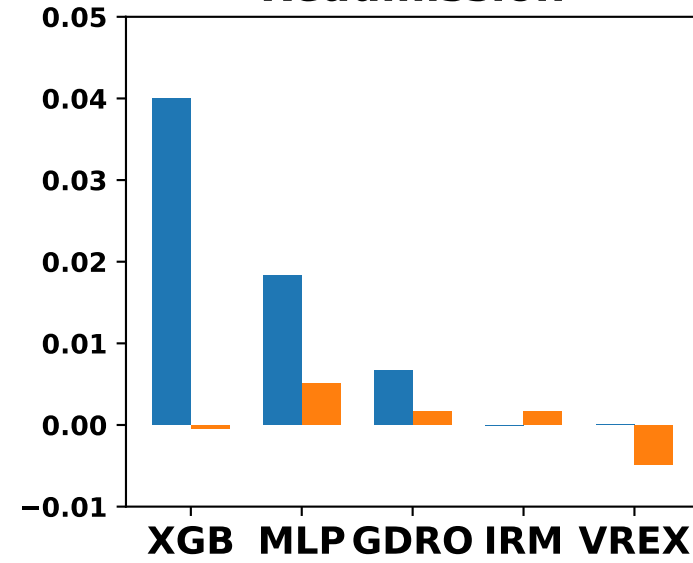

## Food Stamps

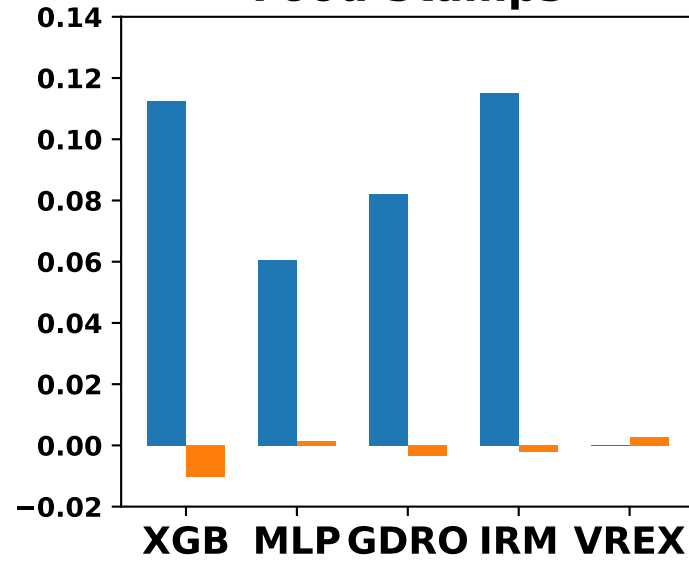

## Diabetes

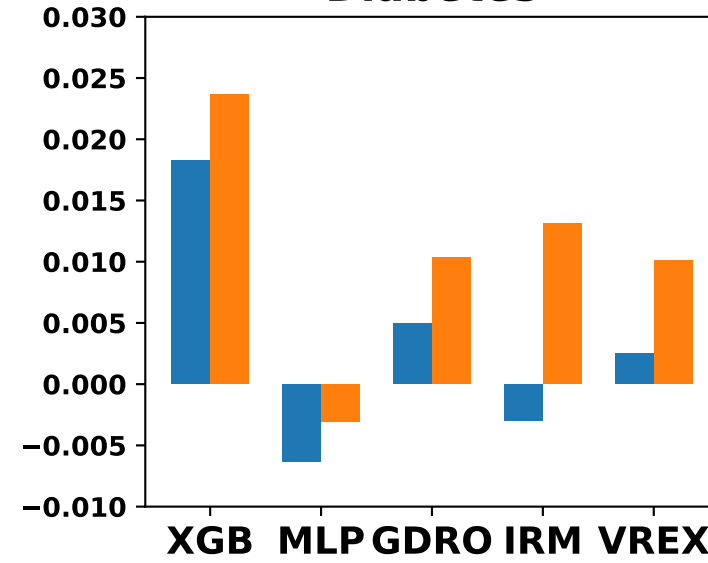

## Income

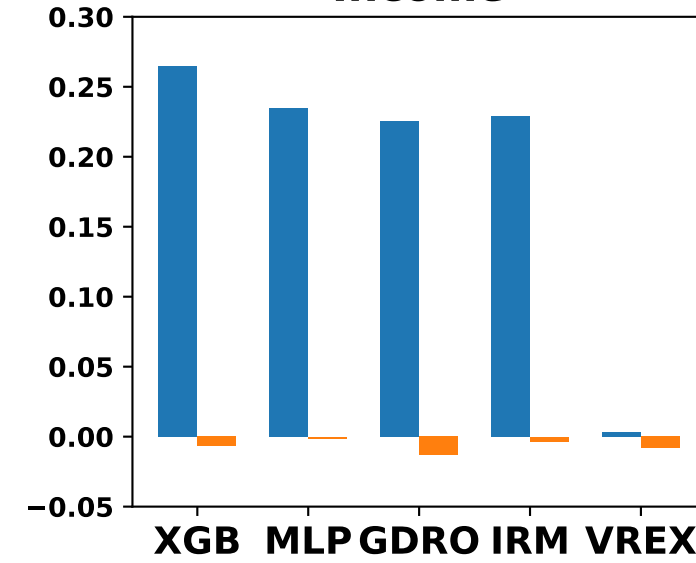

## Unemployment

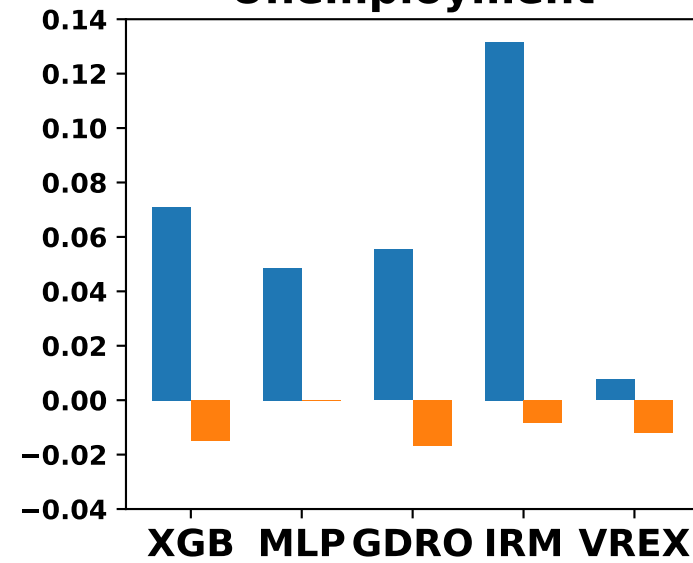

## ASSISTments

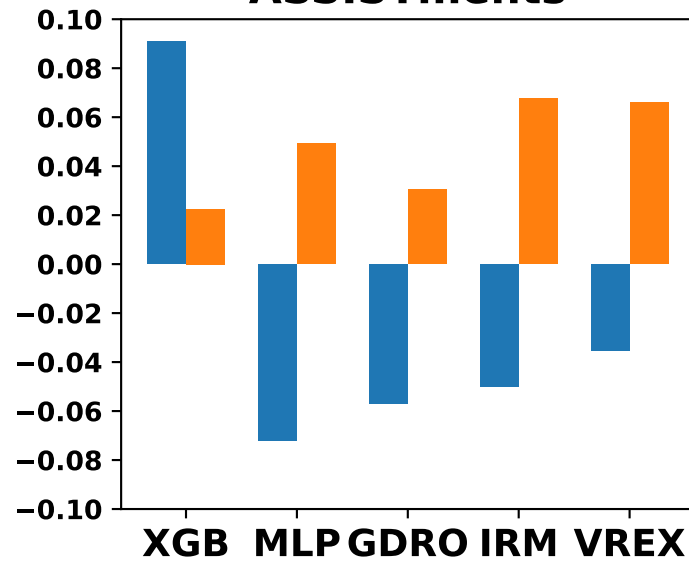

## Public Coverage

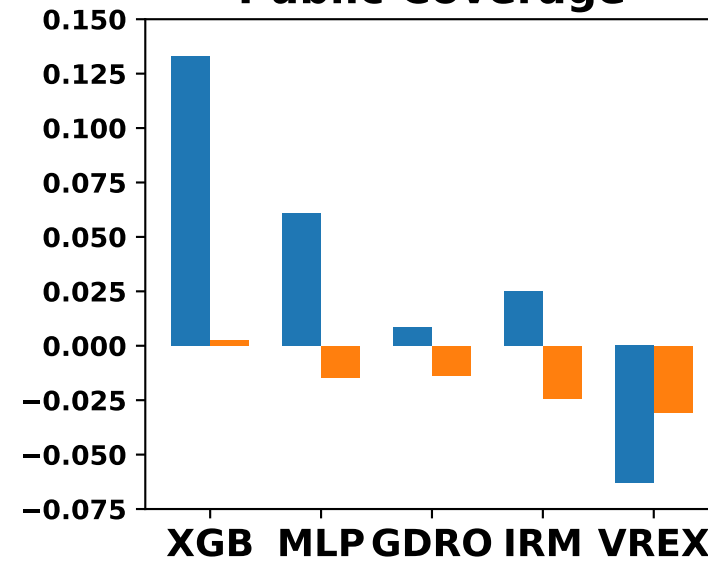

## Hypertension

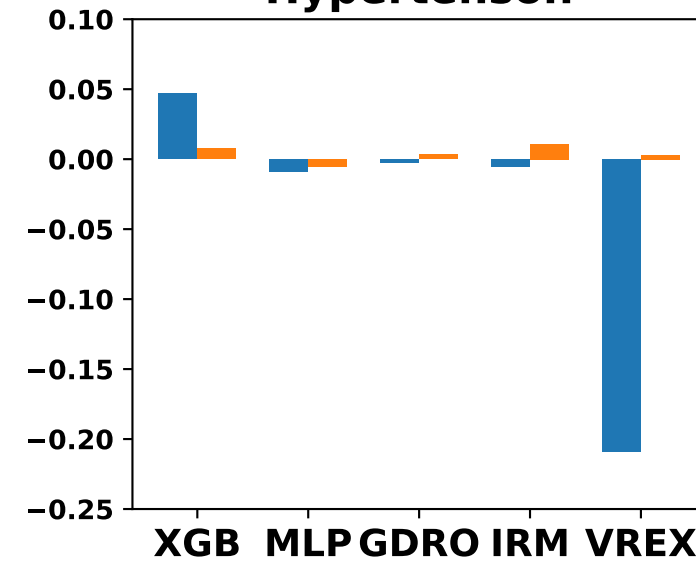

■ **CI-Res**
■  $-\frac{\text{Var}}{2} + \frac{\text{LS}}{2} + \frac{\text{FS}}{2} - \frac{\text{CS}}{2}$
