# Supplementary material
Source: ML conference proceedings conference paper supplement (https://openreview.net/forum?id=sFjxg8cyJS)
Supplement: supplementary_material [file train_shiftdifferences_datasets.pdf › code/realworld/results/hyperparamsetting/train_shiftdifferences_datasets.pdf]

# Train Environments

## Readmission

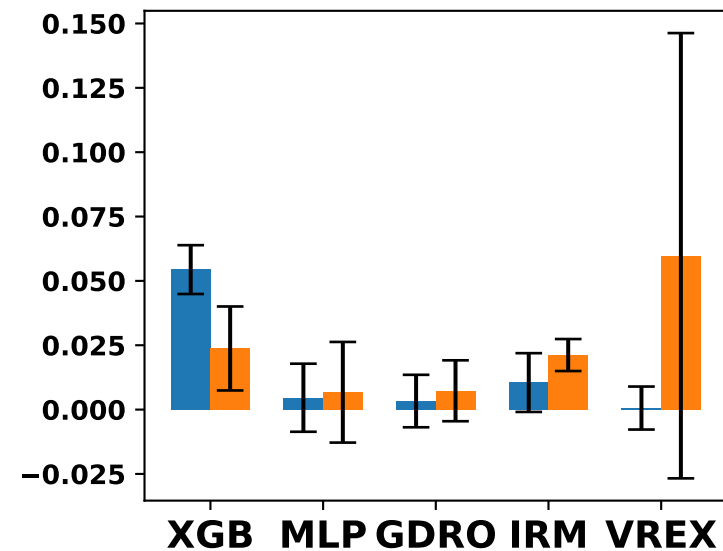

## Food Stamps

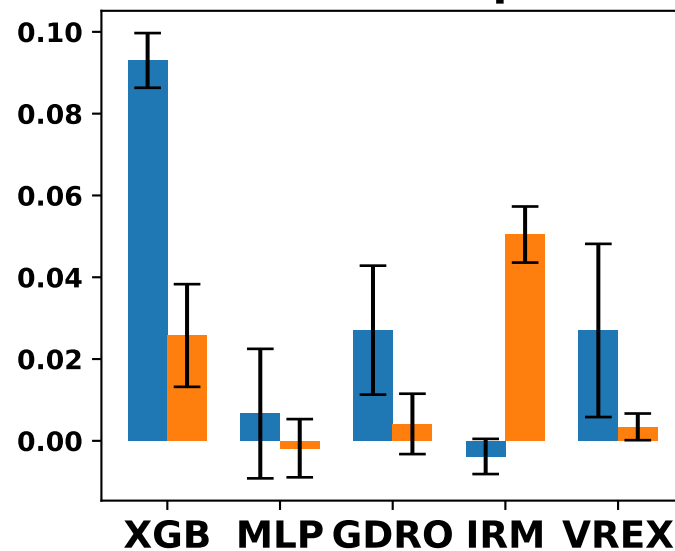

## Diabetes

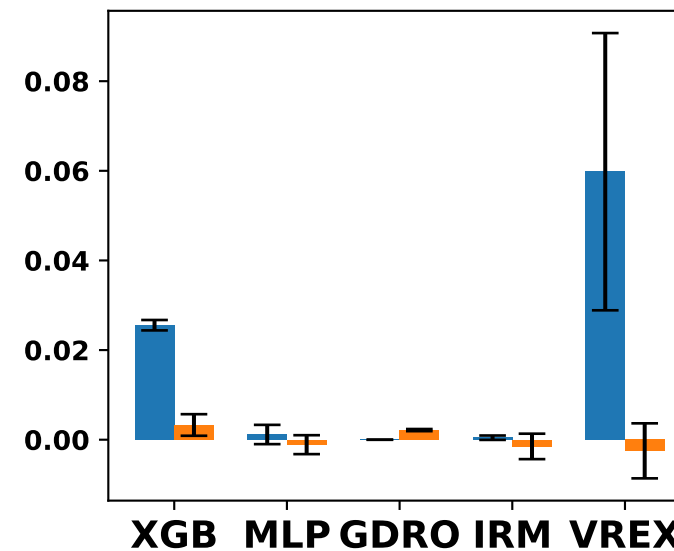

## Income

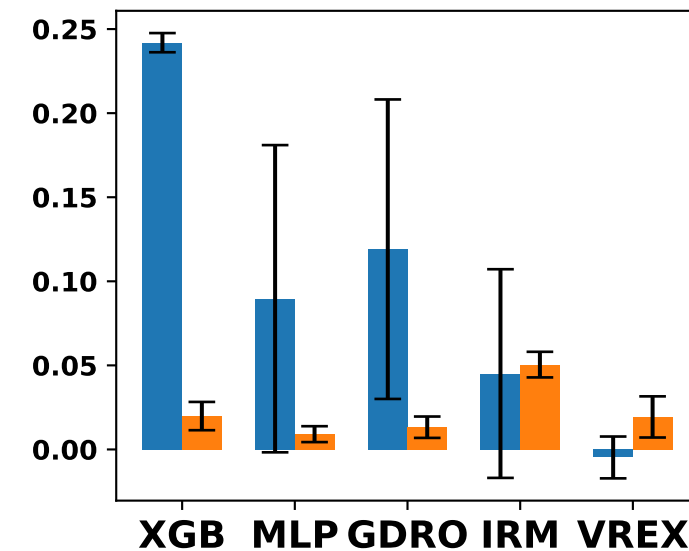

## Unemployment

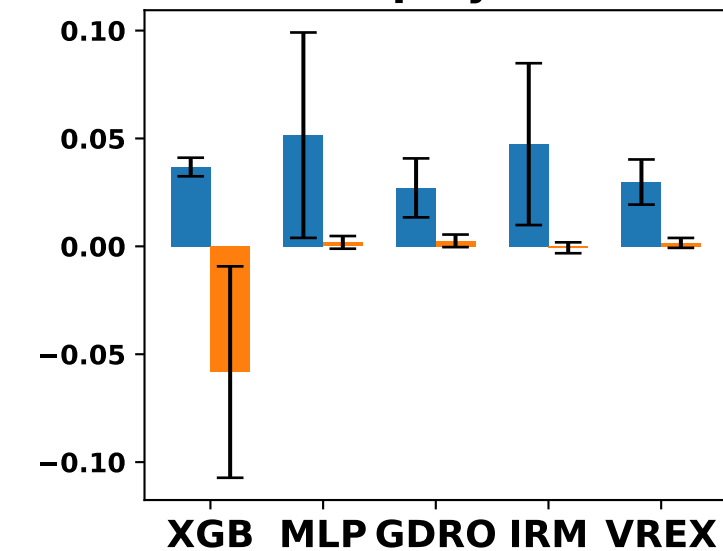

## ASSISTments

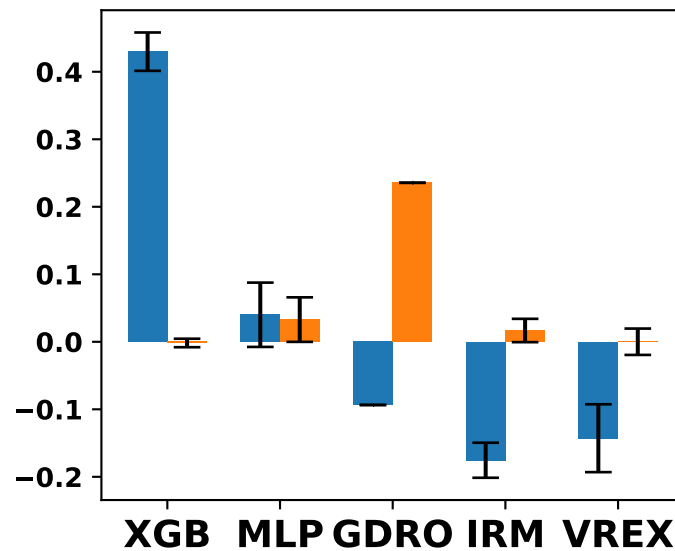

## Public Coverage

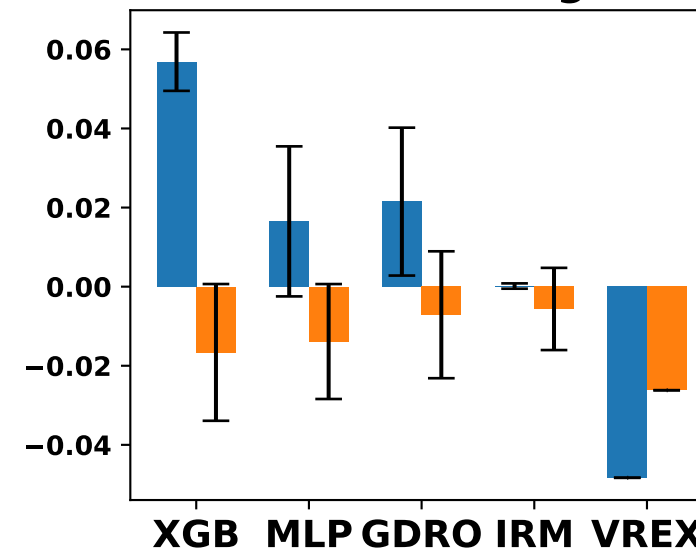

## Hypertension

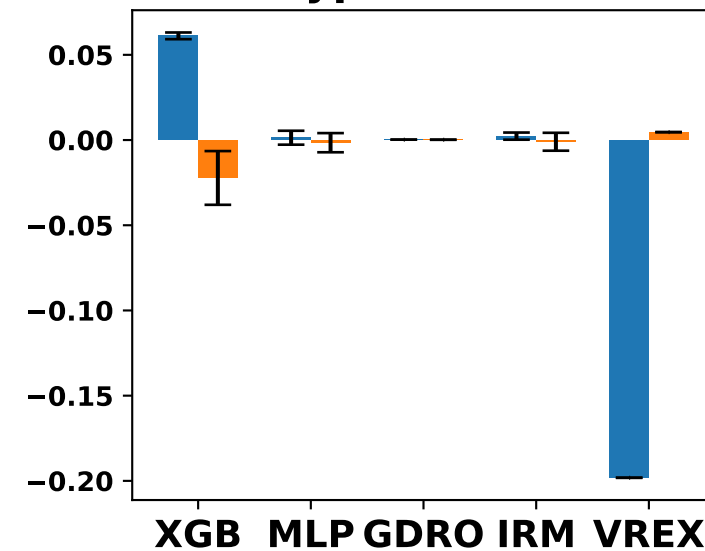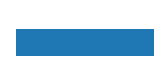

CI - Res

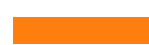

$$-\frac{\text{Var}}{2} + \frac{\text{LS}}{2} + \frac{\text{FS}}{2} - \frac{\text{CS}}{2}$$
