# Supplementary material
Source: ML conference proceedings conference paper supplement (https://openreview.net/forum?id=sFjxg8cyJS)

### In-domain: Avg. Over Datasets

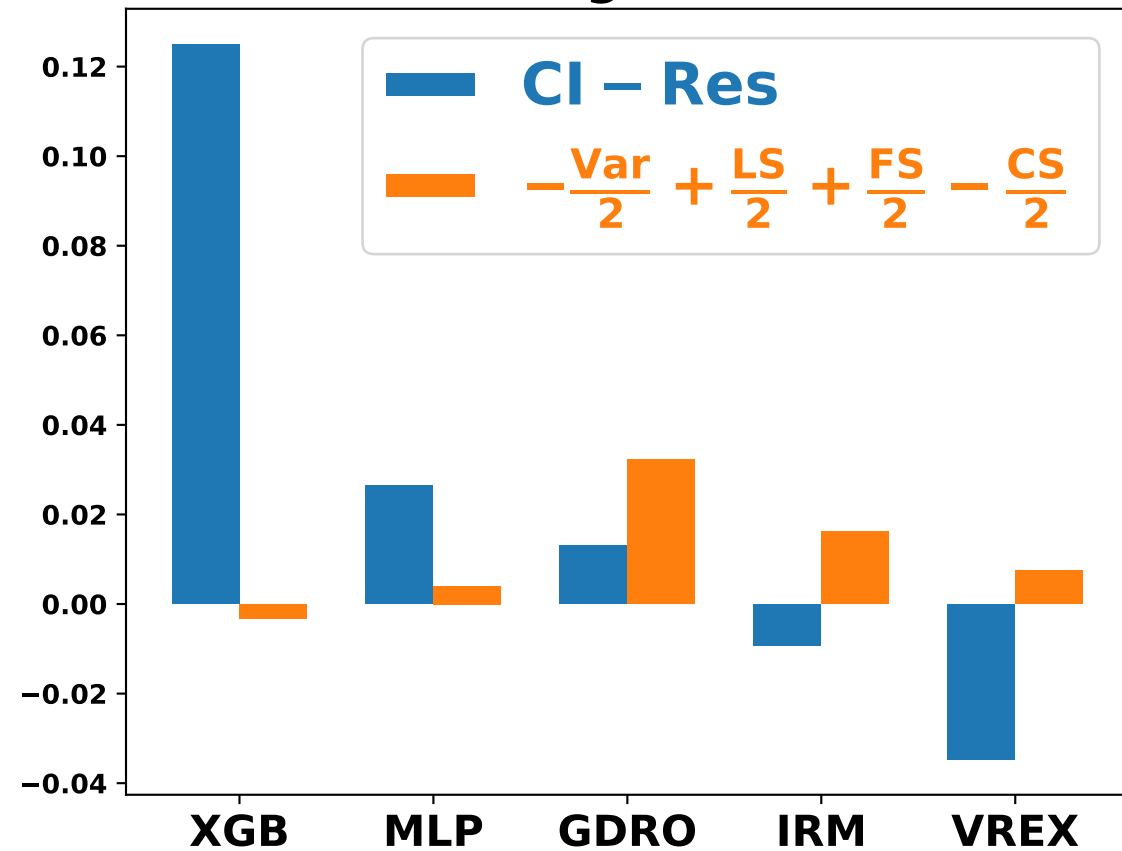

### Out-of-domain: Avg. Over Datasets

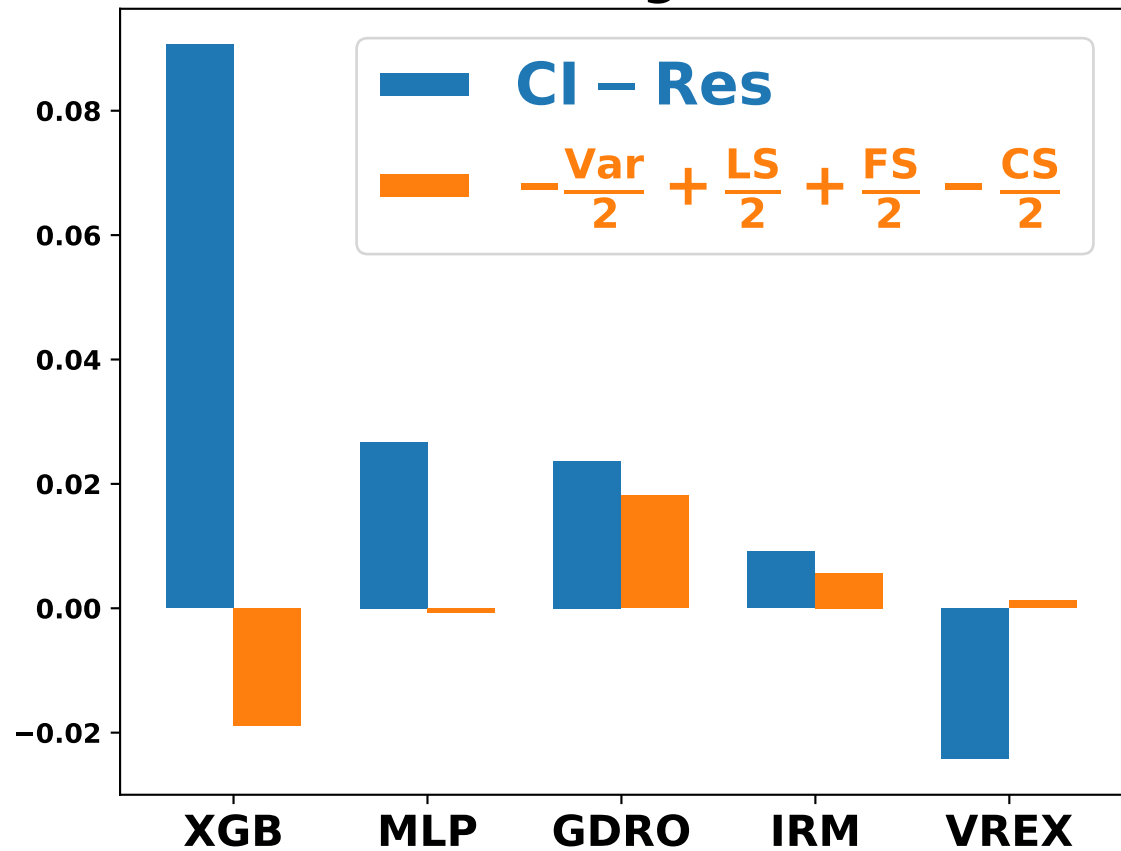

Supplement: supplementary_material [file shiftdifferences.pdf › code/realworld/results/hyperparamsetting/shiftdifferences.pdf]

# Test Data Shifts - GDRO

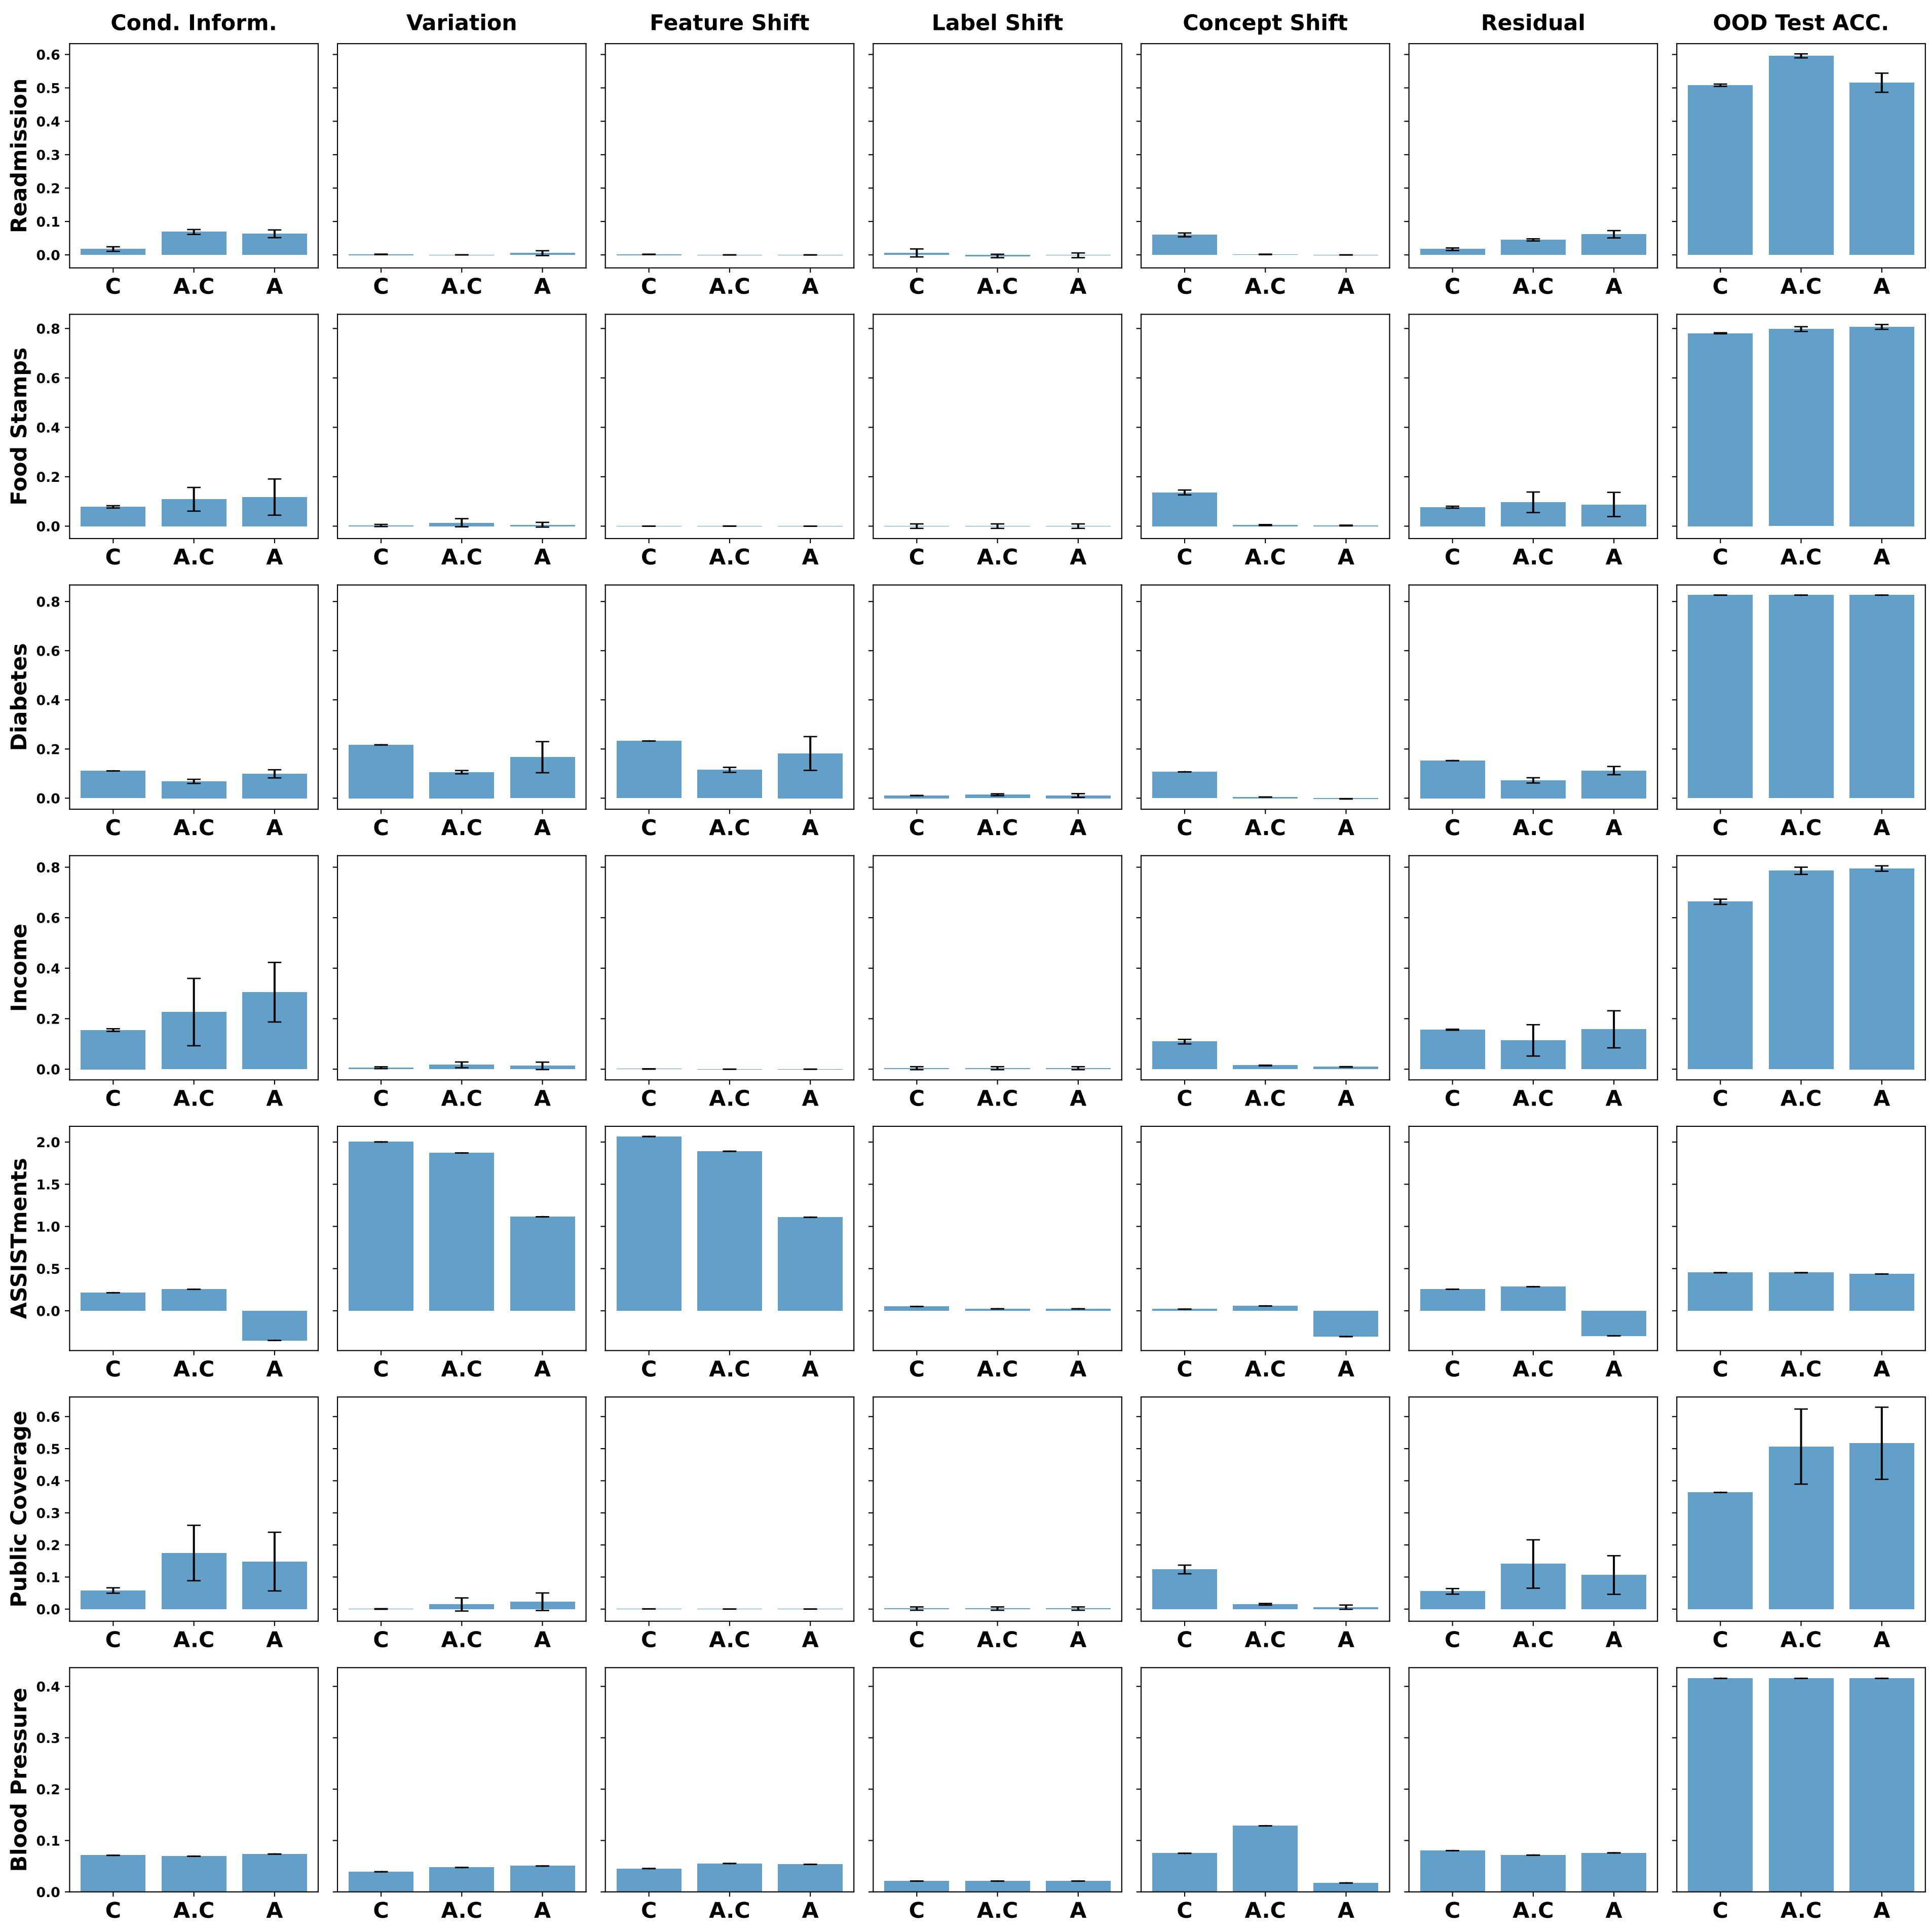

Supplement: supplementary_material [file test_datashifts_gdro.pdf › code/realworld/results/hyperparamsetting/test_datashifts_gdro.pdf]

# Test Data Shifts - IRM

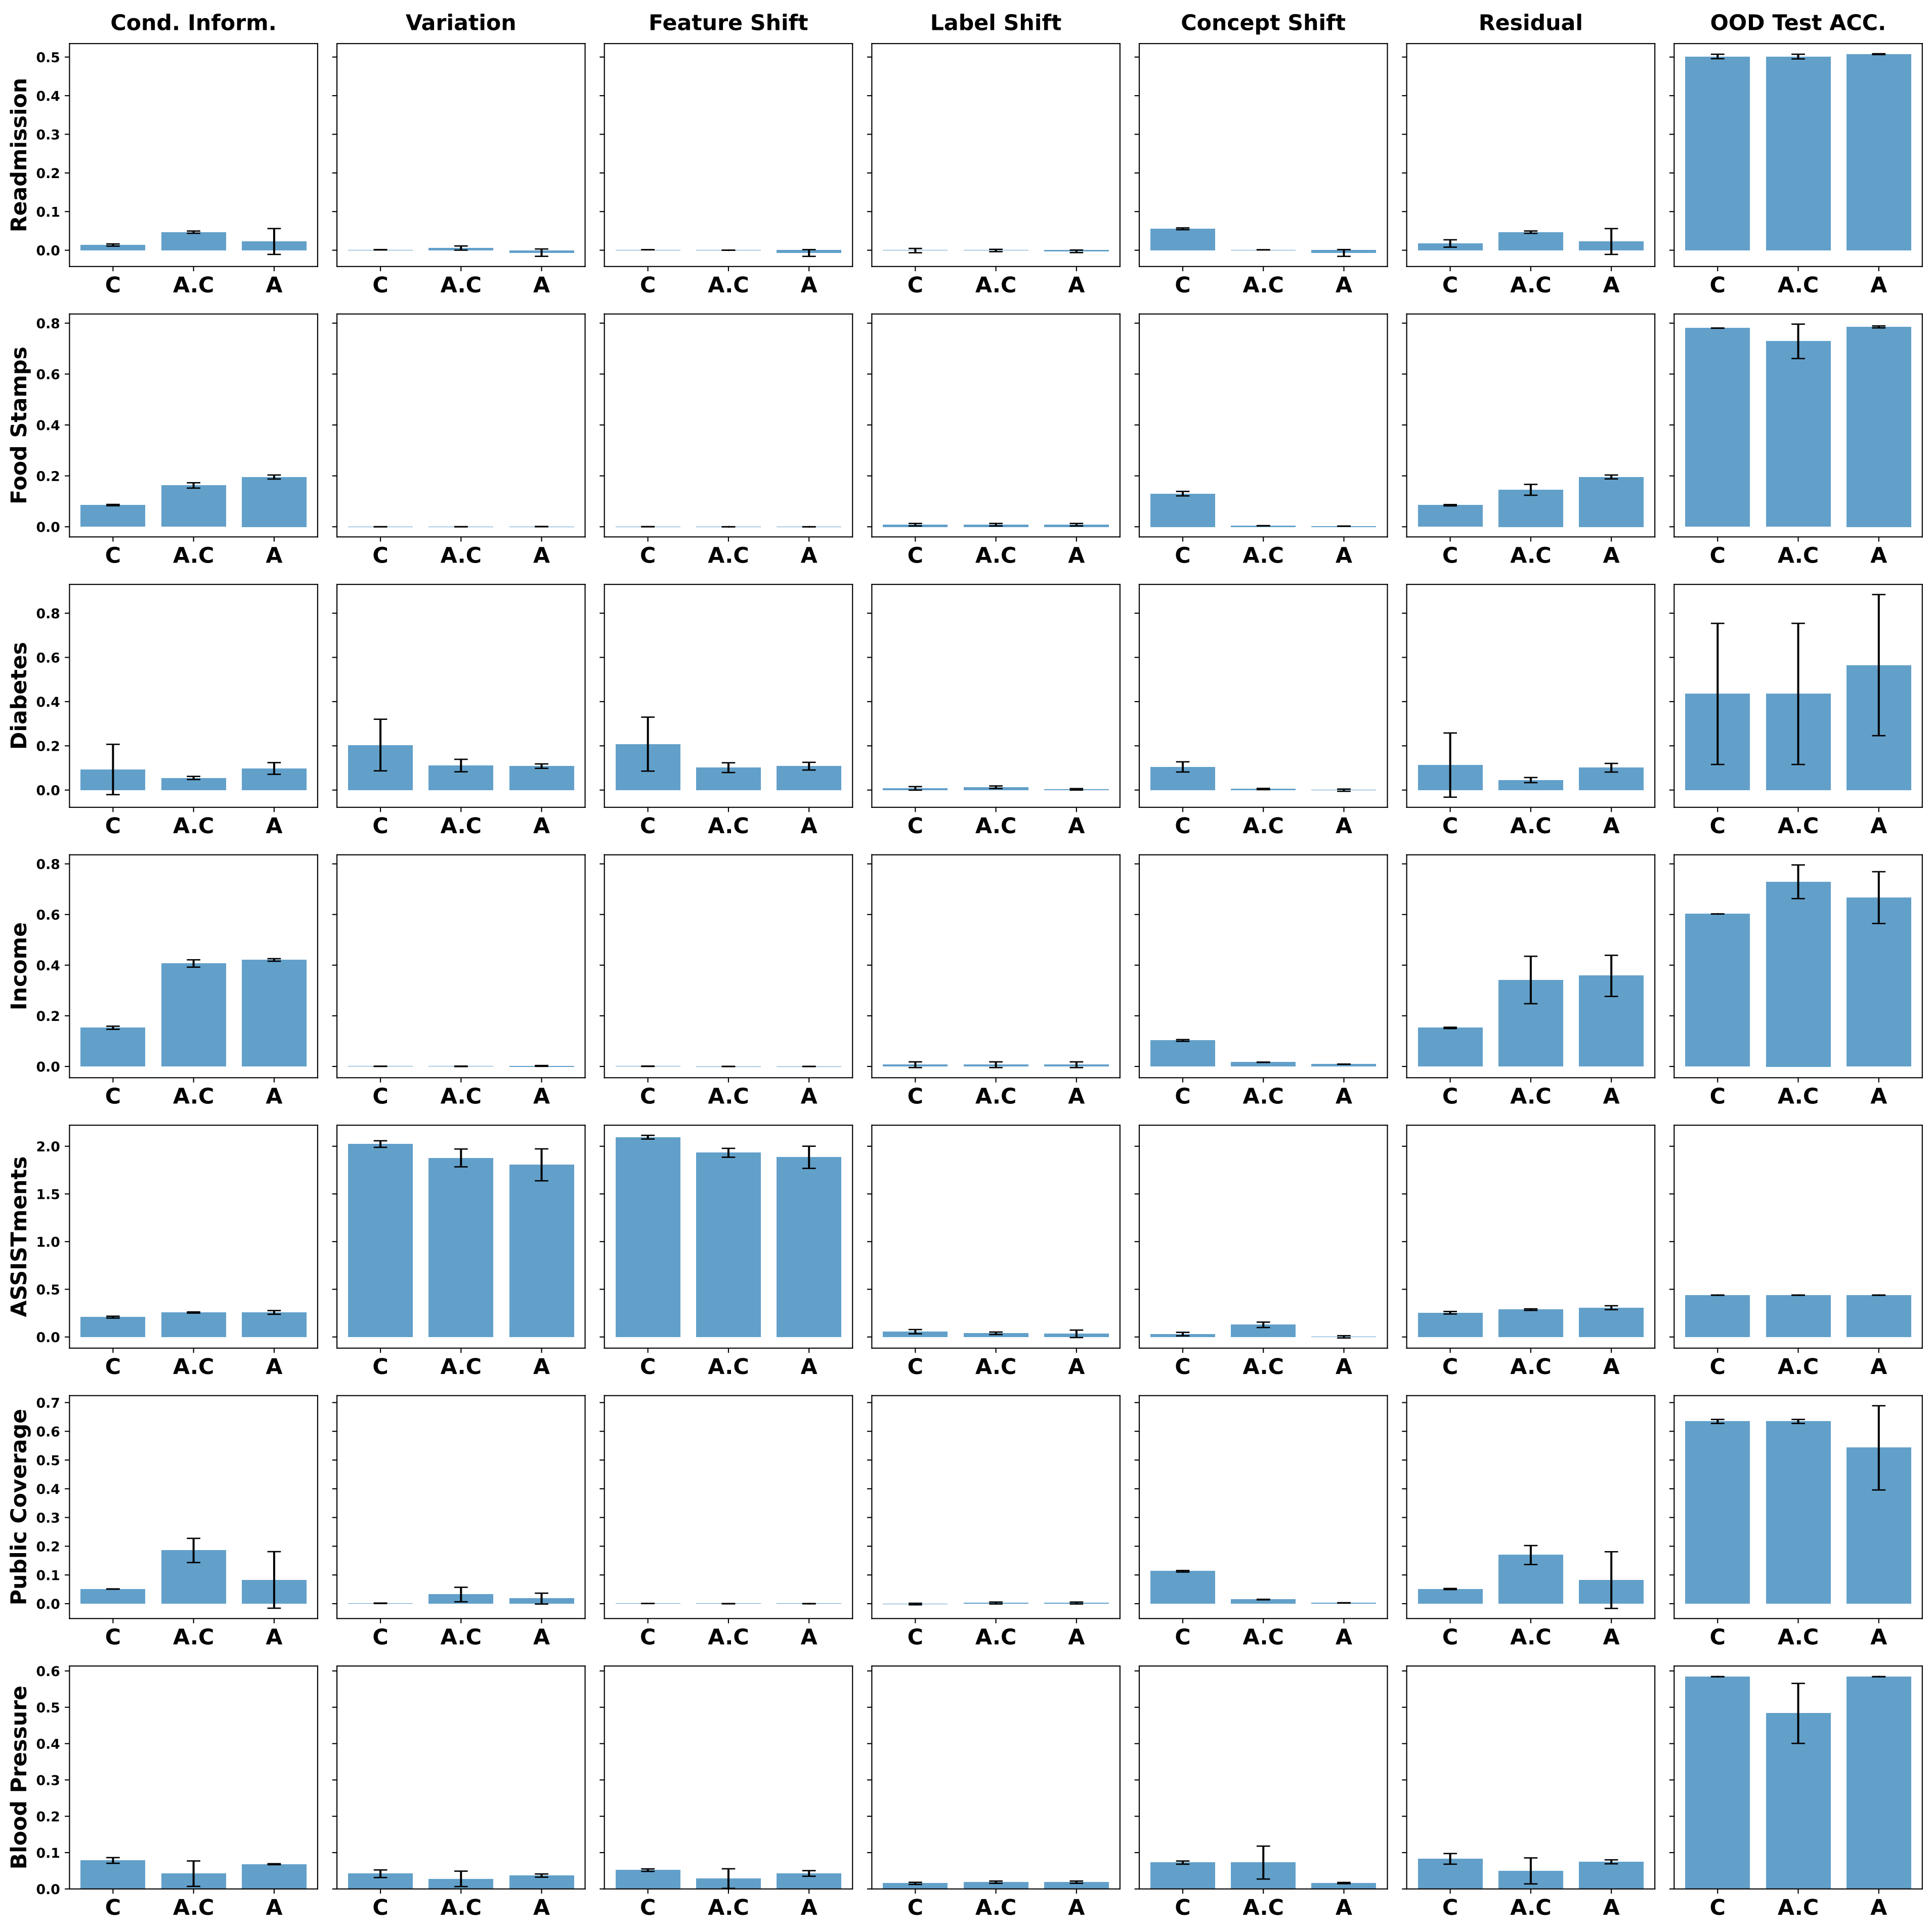

Supplement: supplementary_material [file test_datashifts_irm.pdf › code/realworld/results/hyperparamsetting/test_datashifts_irm.pdf]

# Test Data Shifts - MLP

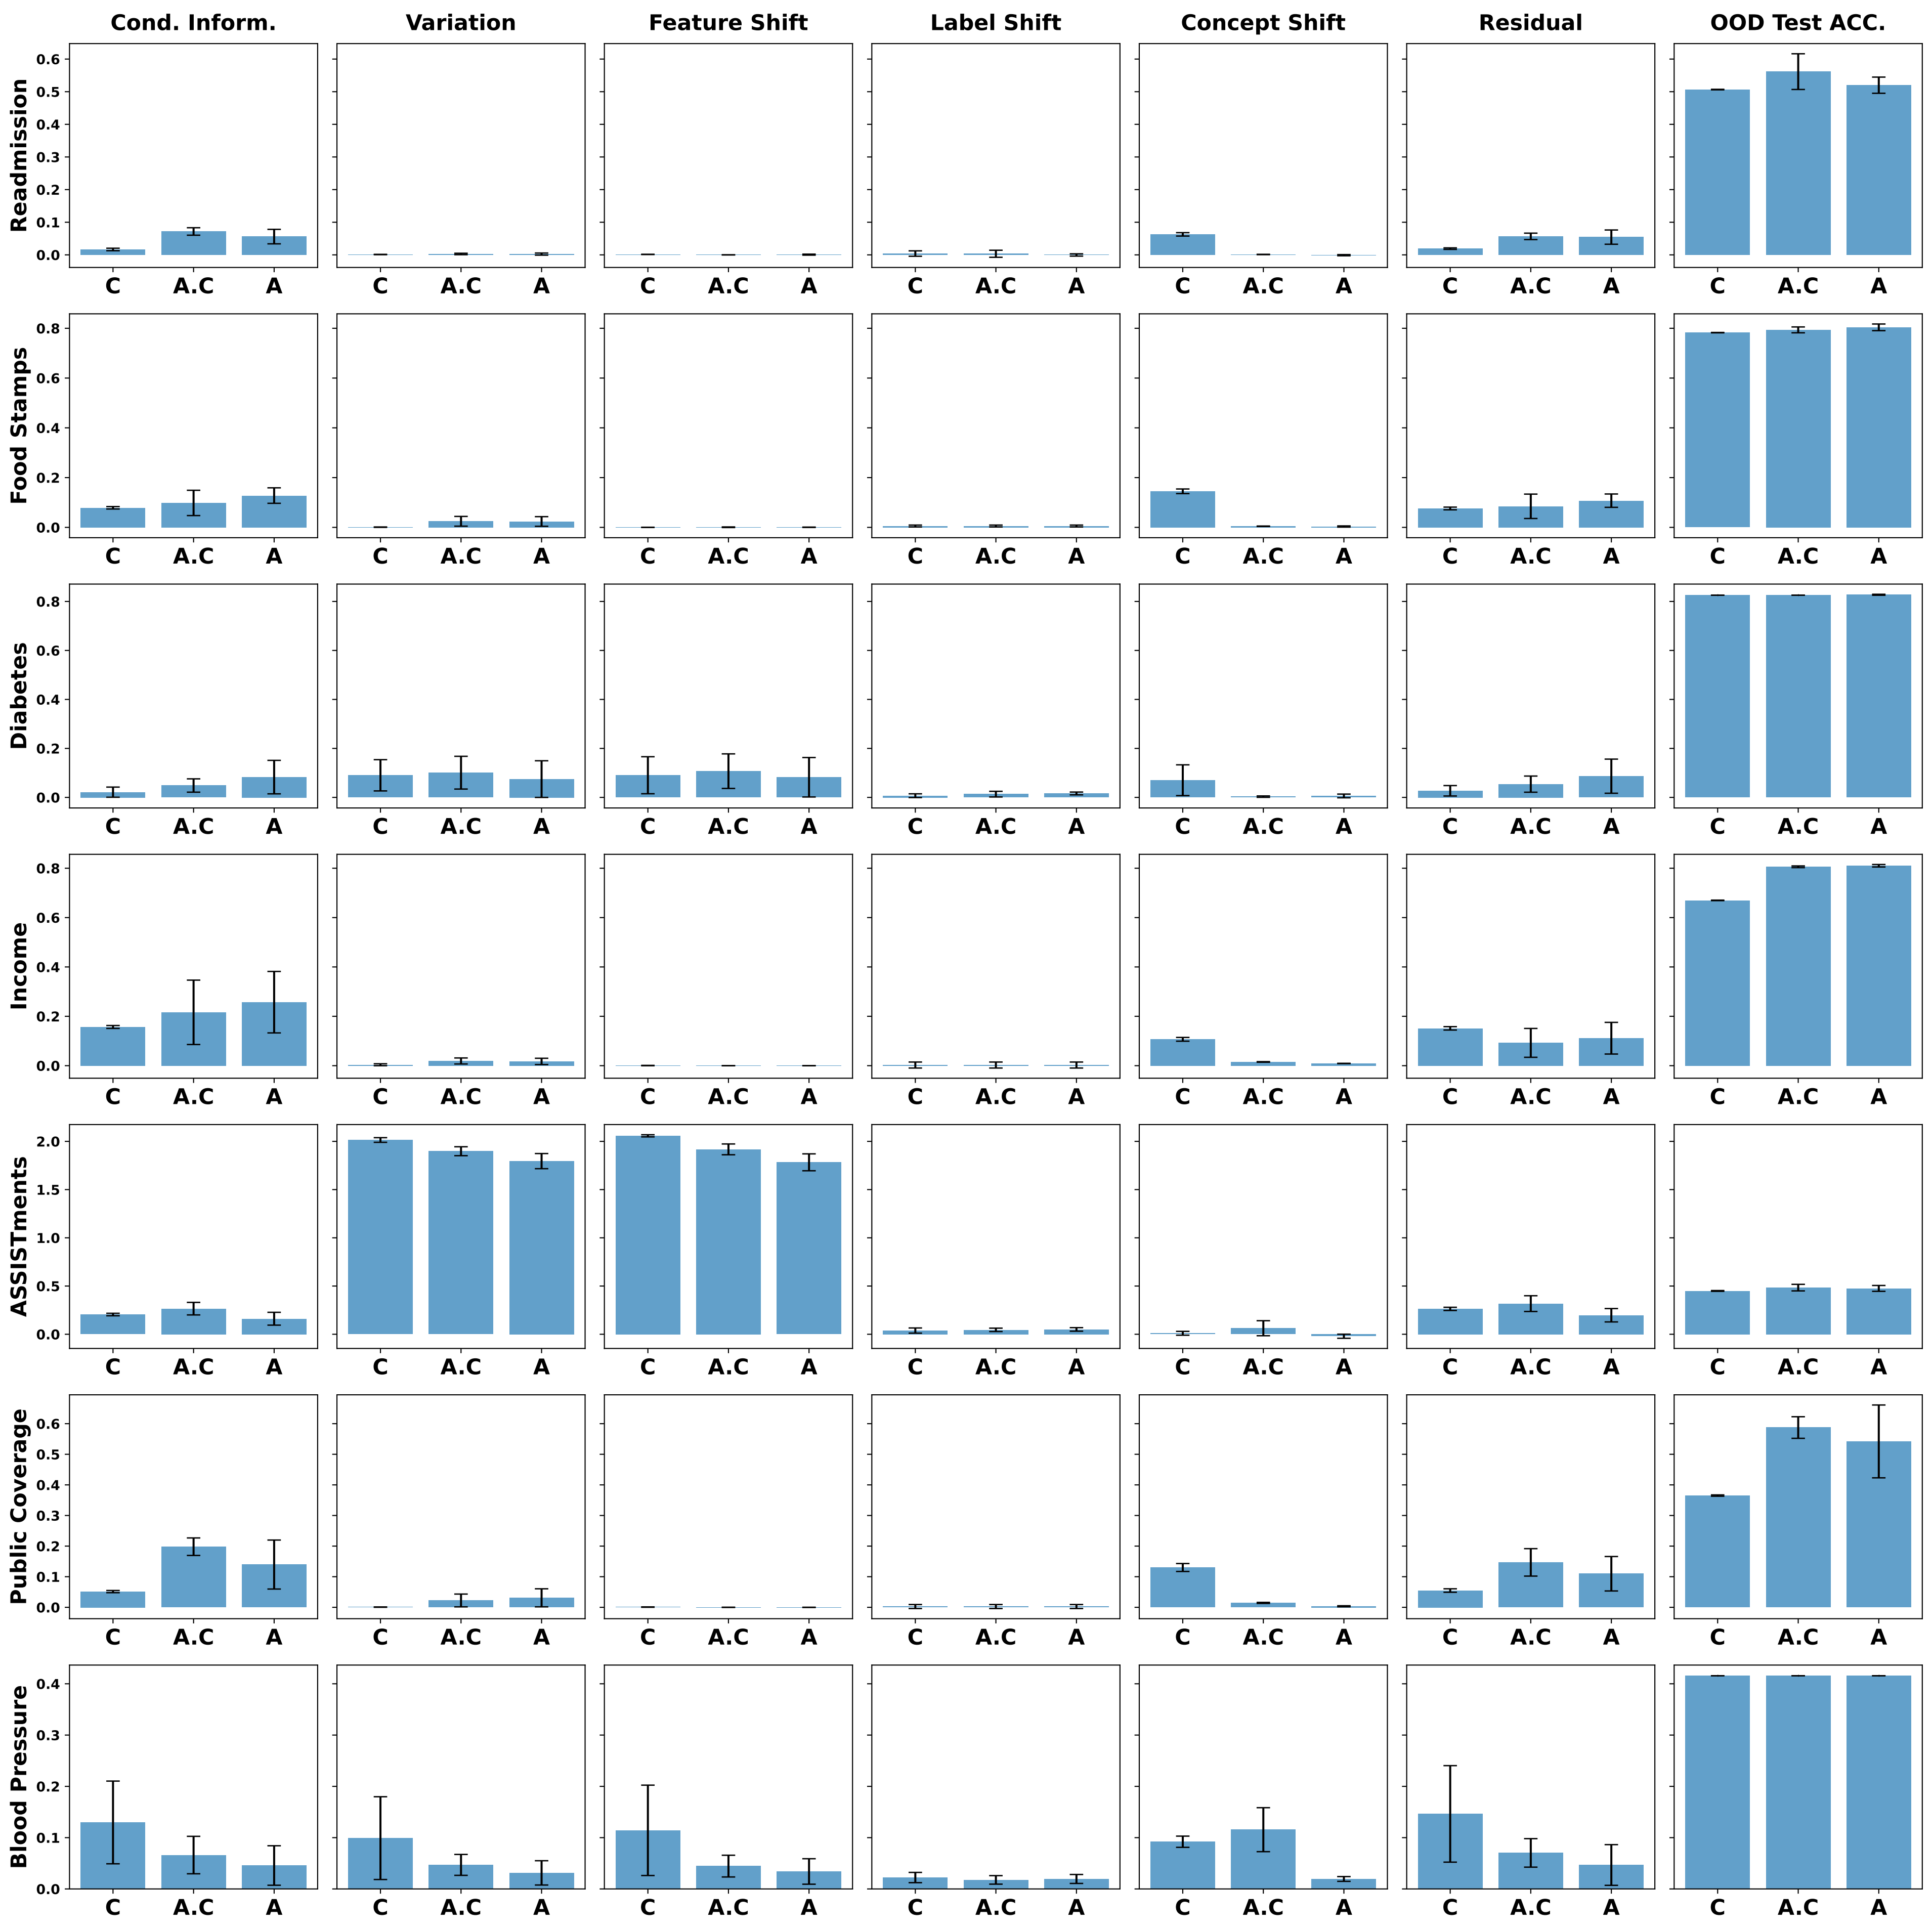

Supplement: supplementary_material [file test_datashifts_mlp.pdf › code/realworld/results/hyperparamsetting/test_datashifts_mlp.pdf]

# Test Data Shifts - VREX

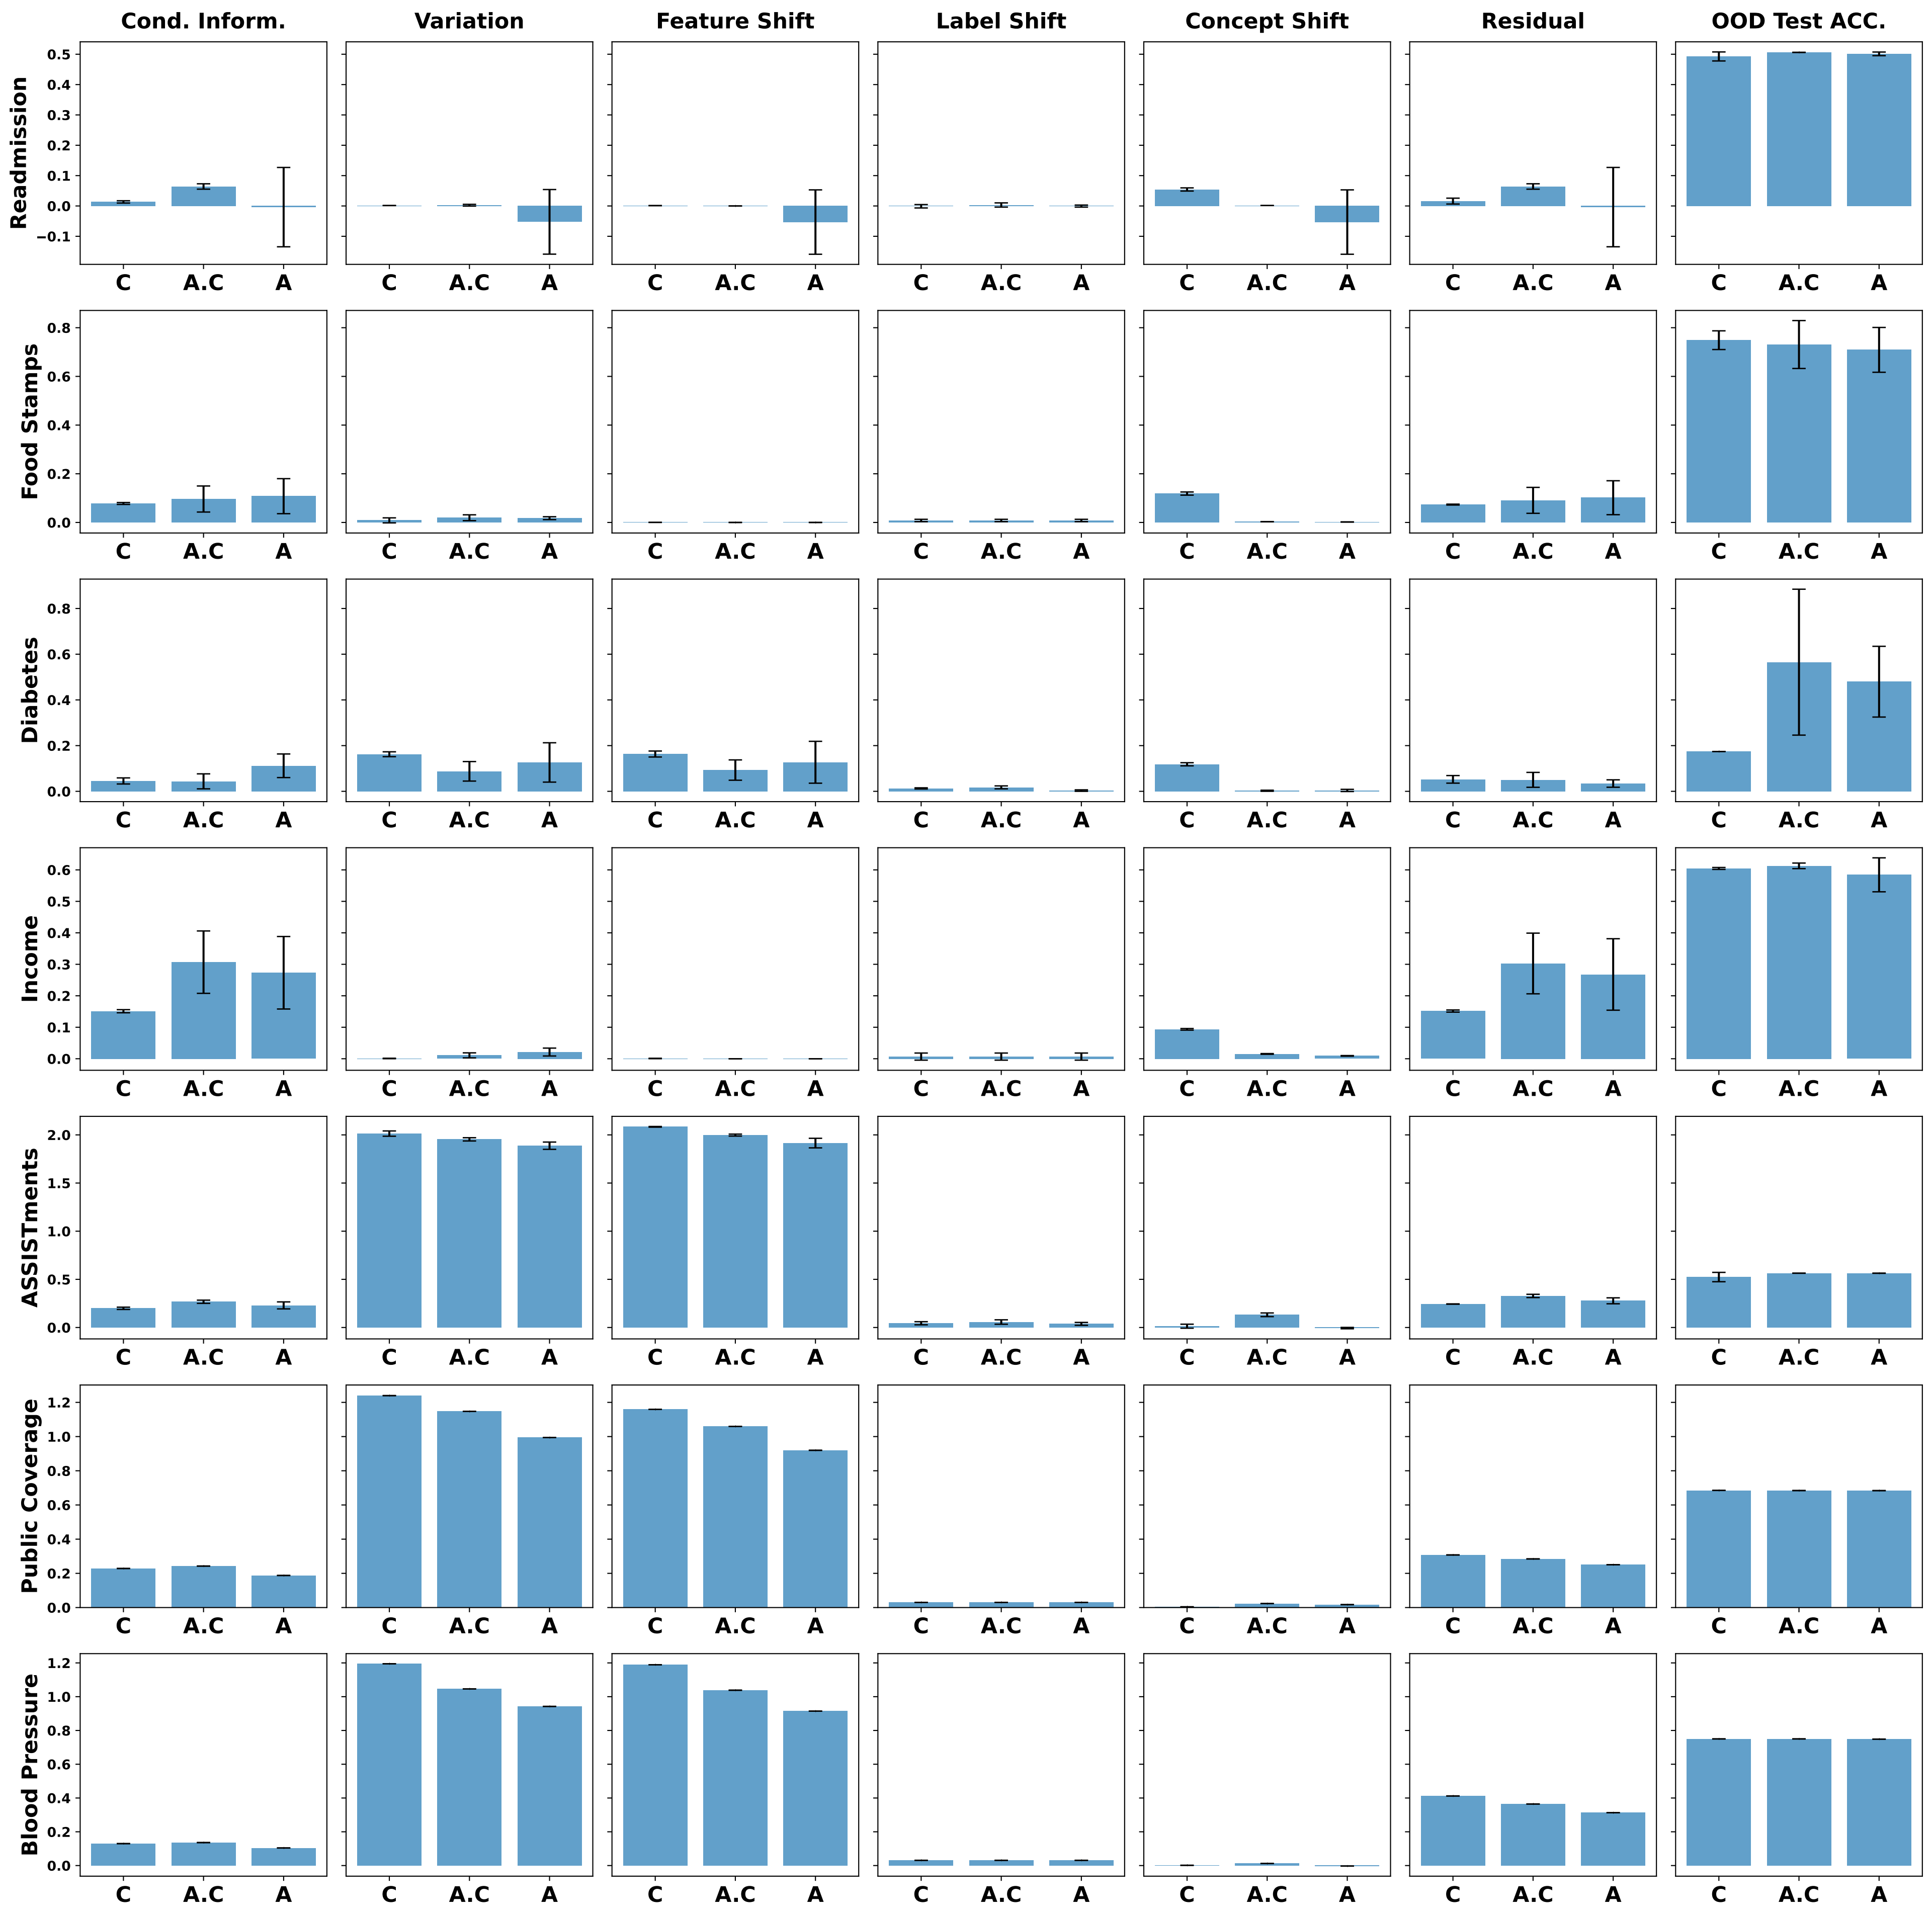

Supplement: supplementary_material [file test_datashifts_vrex.pdf › code/realworld/results/hyperparamsetting/test_datashifts_vrex.pdf]

# Test Data Shifts - XGB

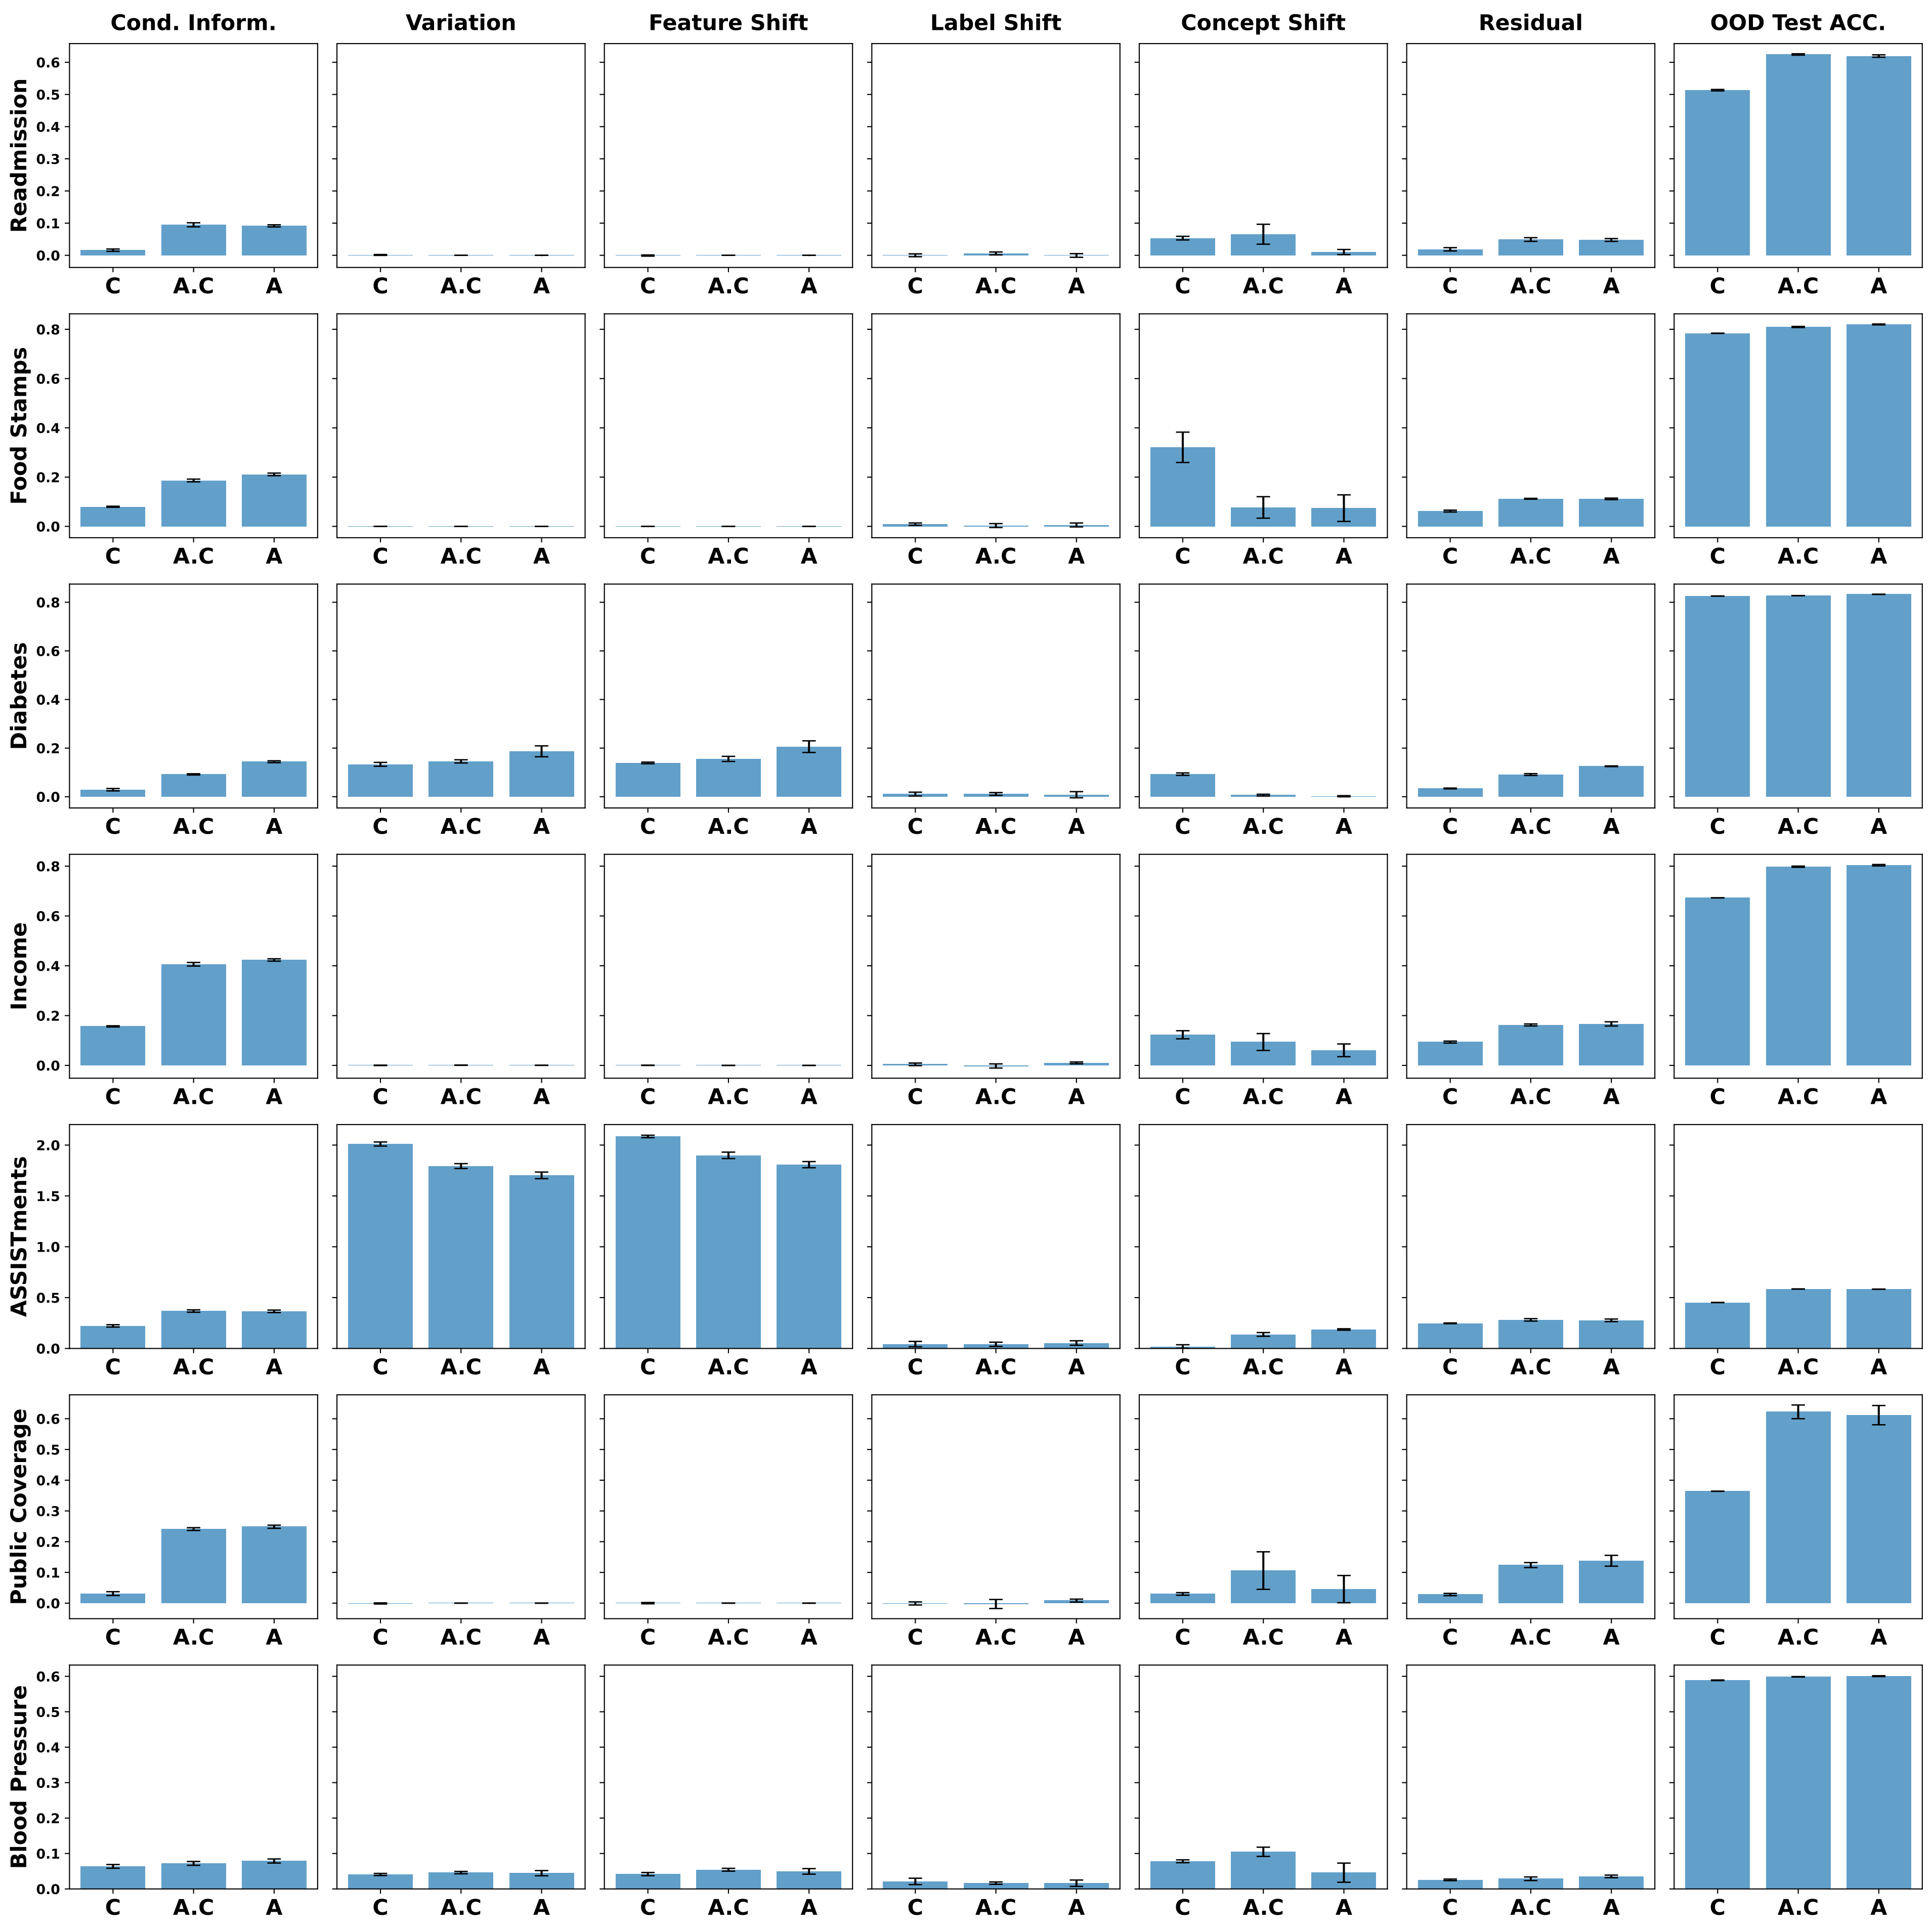

Supplement: supplementary_material [file test_datashifts_xgb.pdf › code/realworld/results/hyperparamsetting/test_datashifts_xgb.pdf]

# Train Data Shifts - GDRO

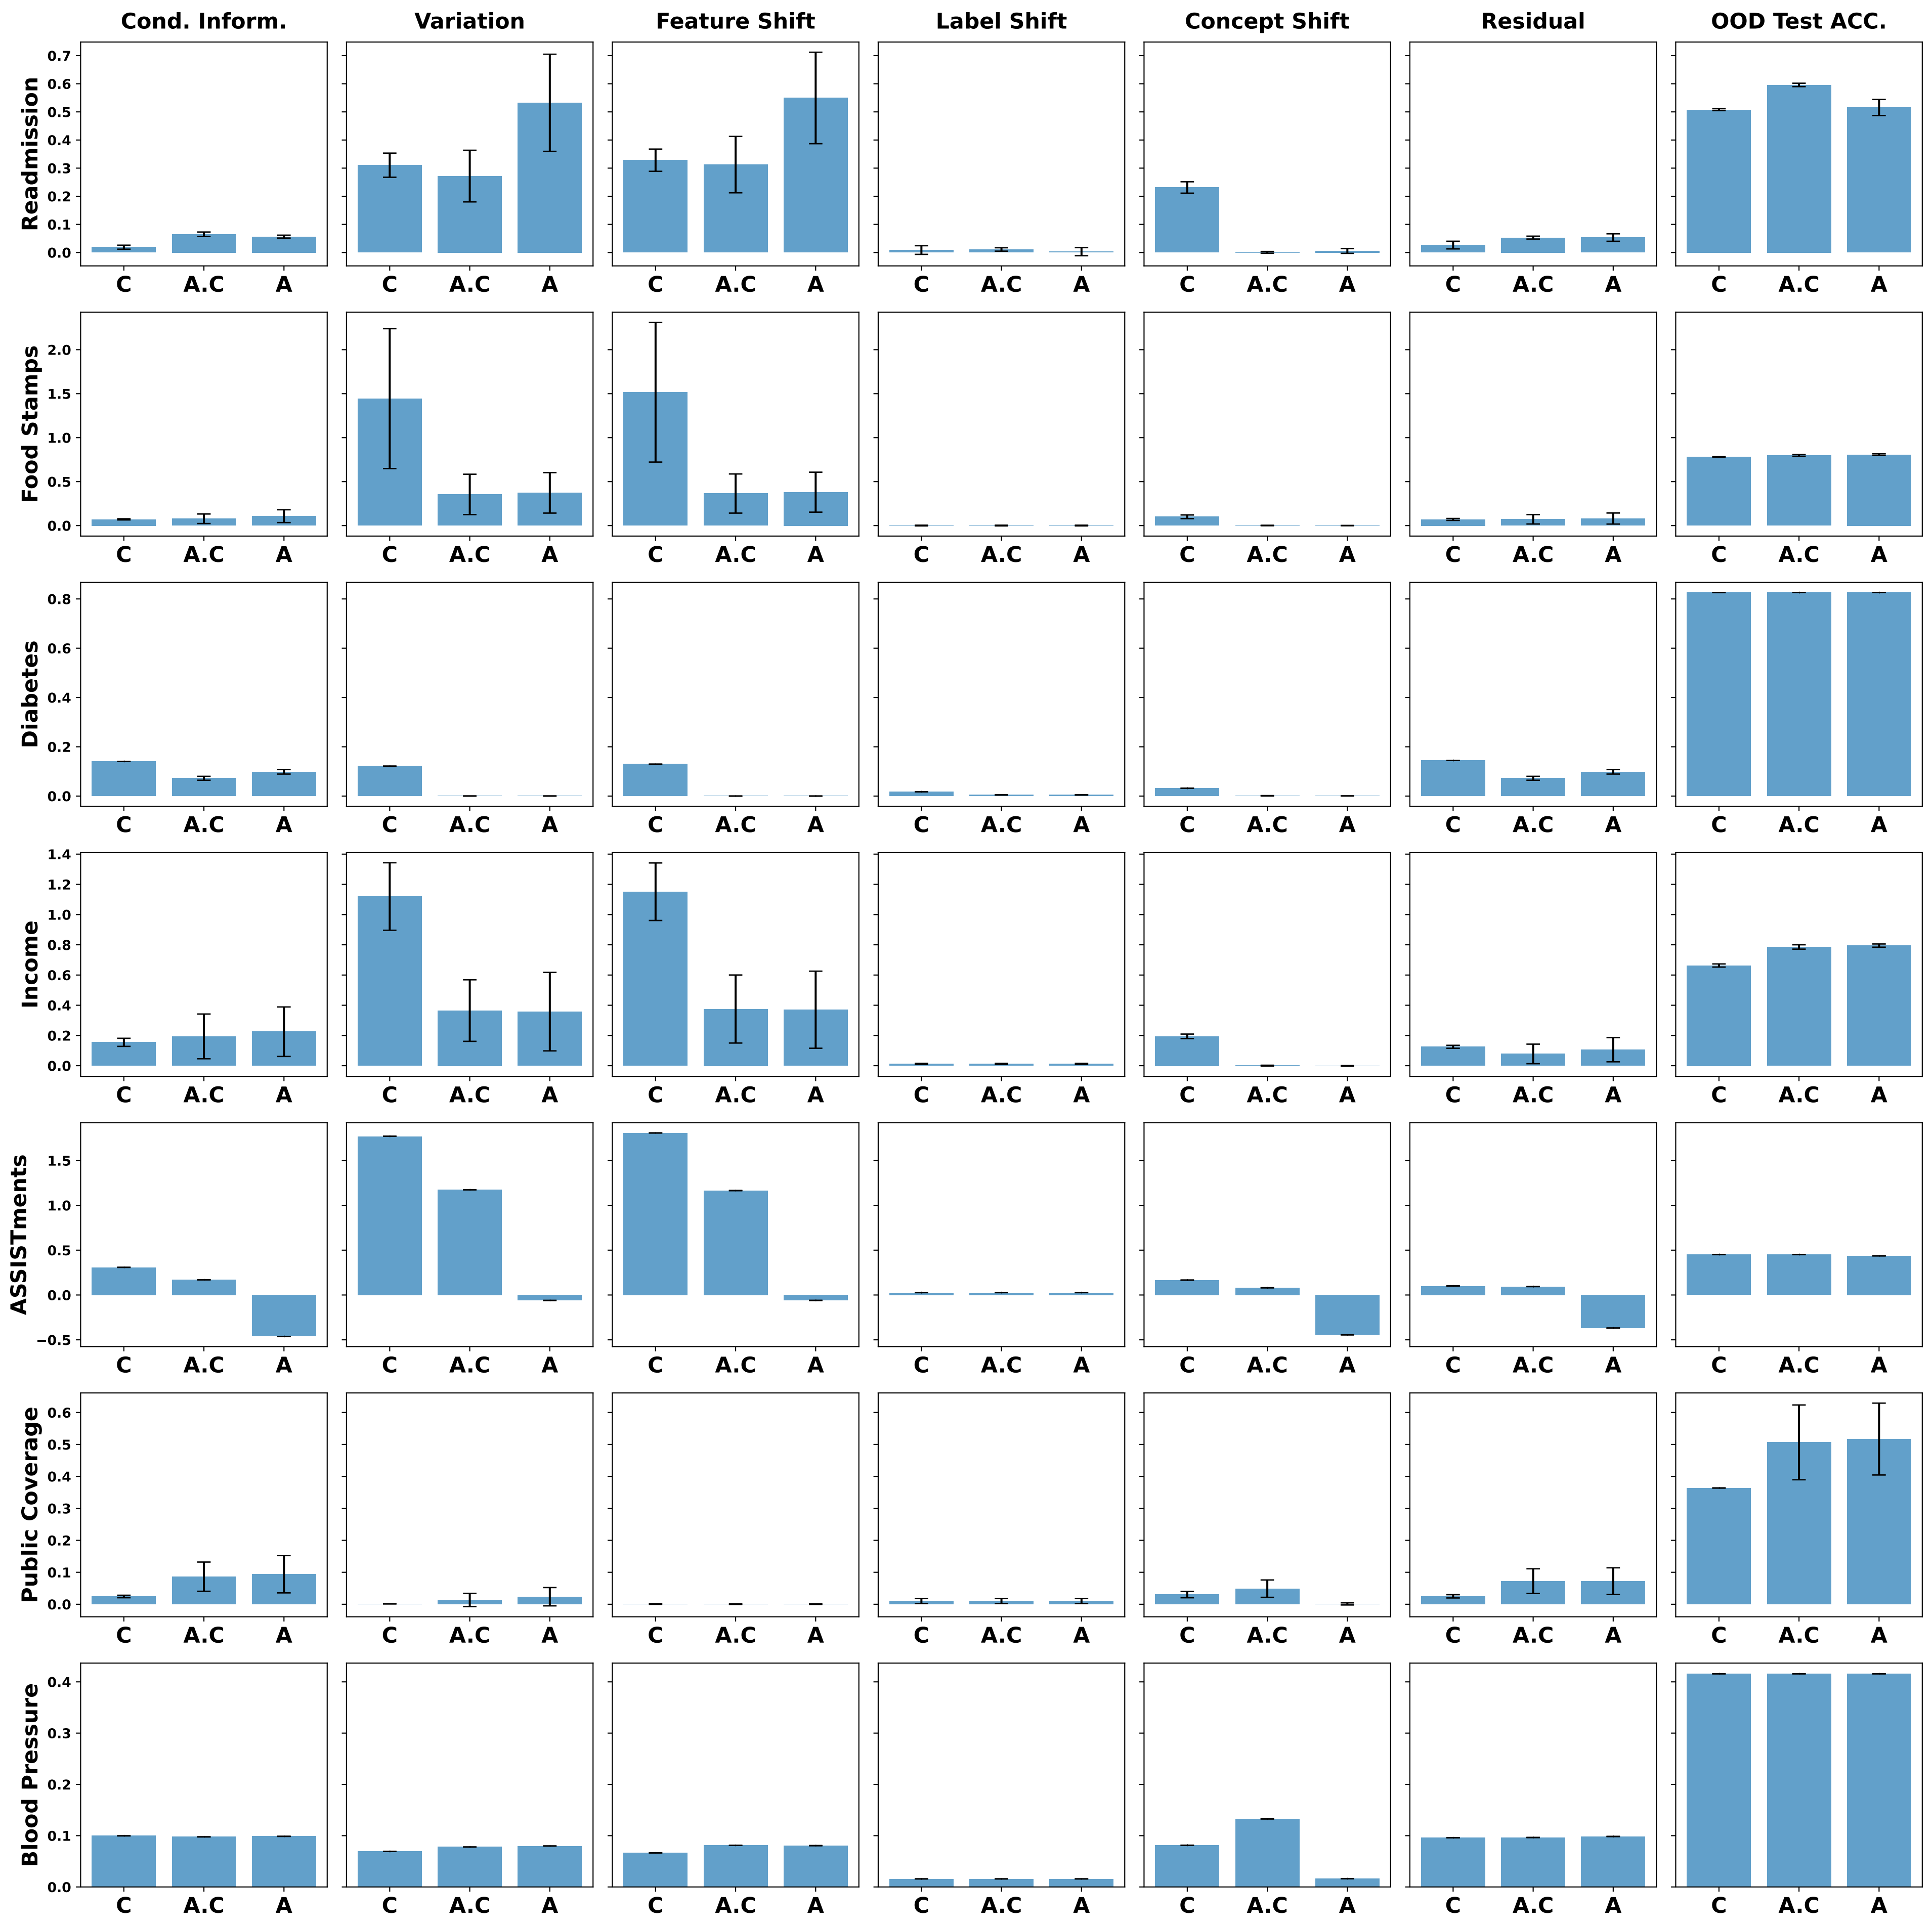

Supplement: supplementary_material [file train_datashifts_gdro.pdf › code/realworld/results/hyperparamsetting/train_datashifts_gdro.pdf]

# Train Data Shifts - IRM

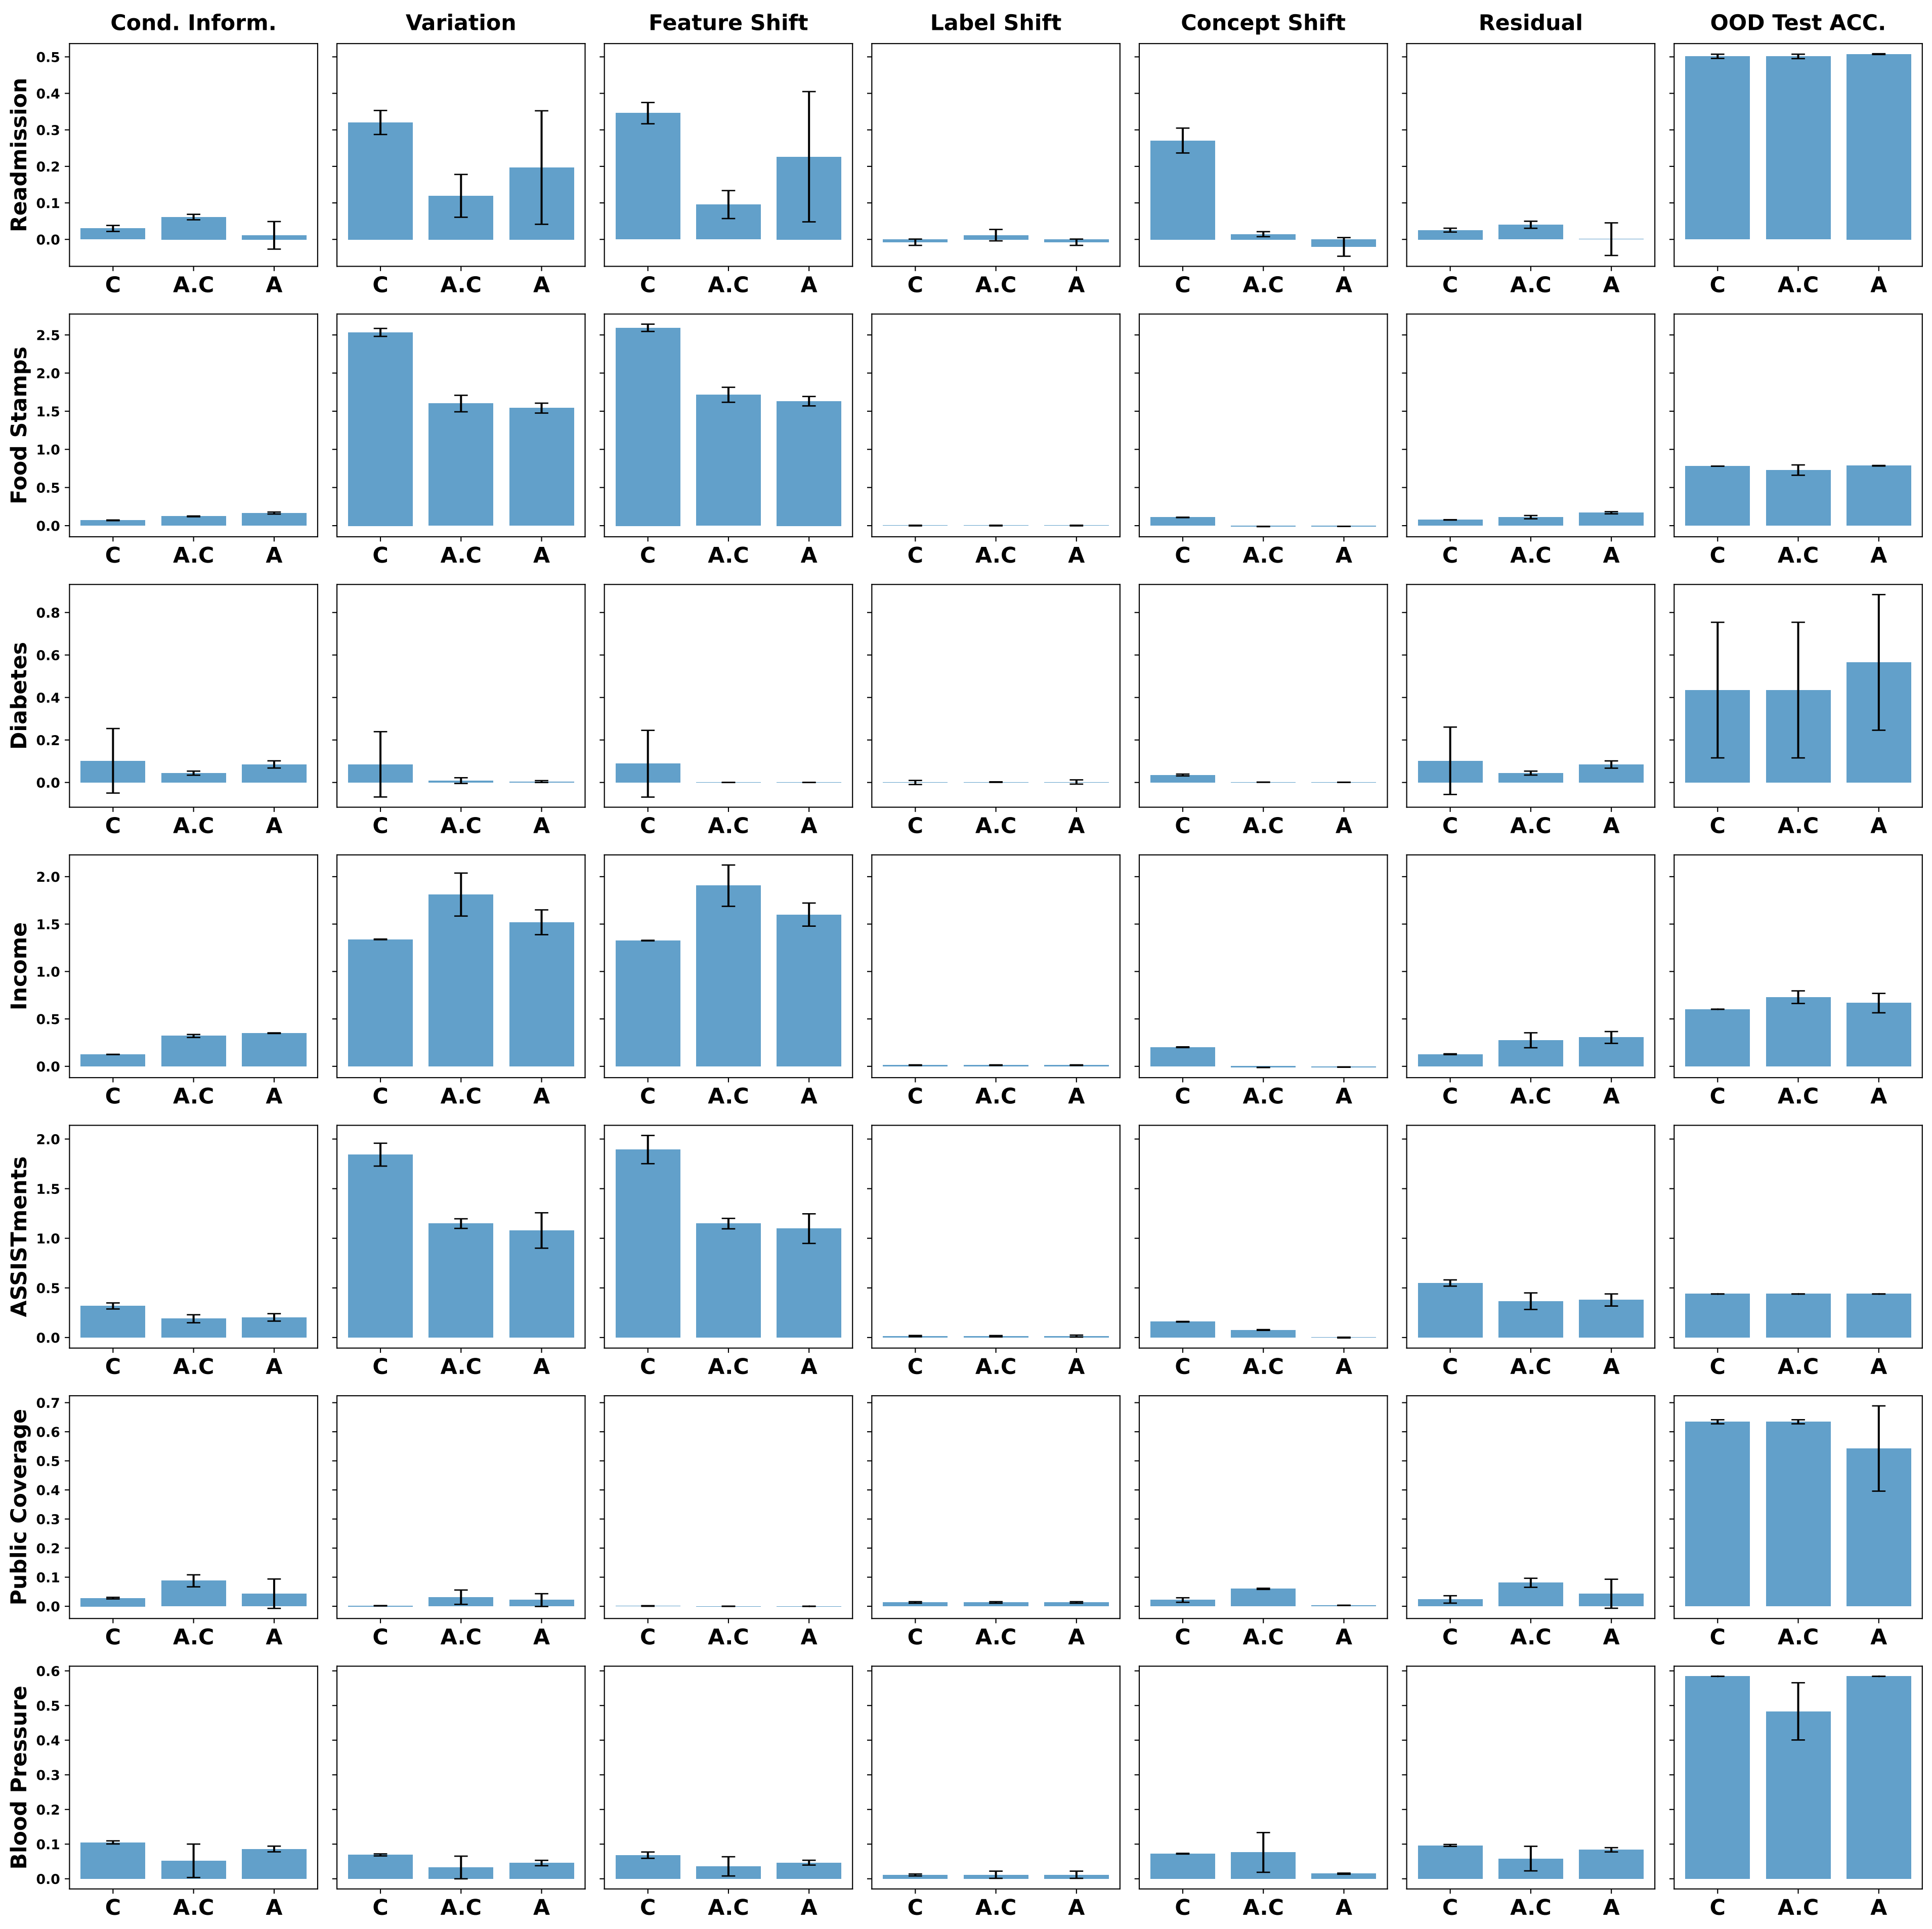

Supplement: supplementary_material [file train_datashifts_irm.pdf › code/realworld/results/hyperparamsetting/train_datashifts_irm.pdf]

# Train Data Shifts - MLP

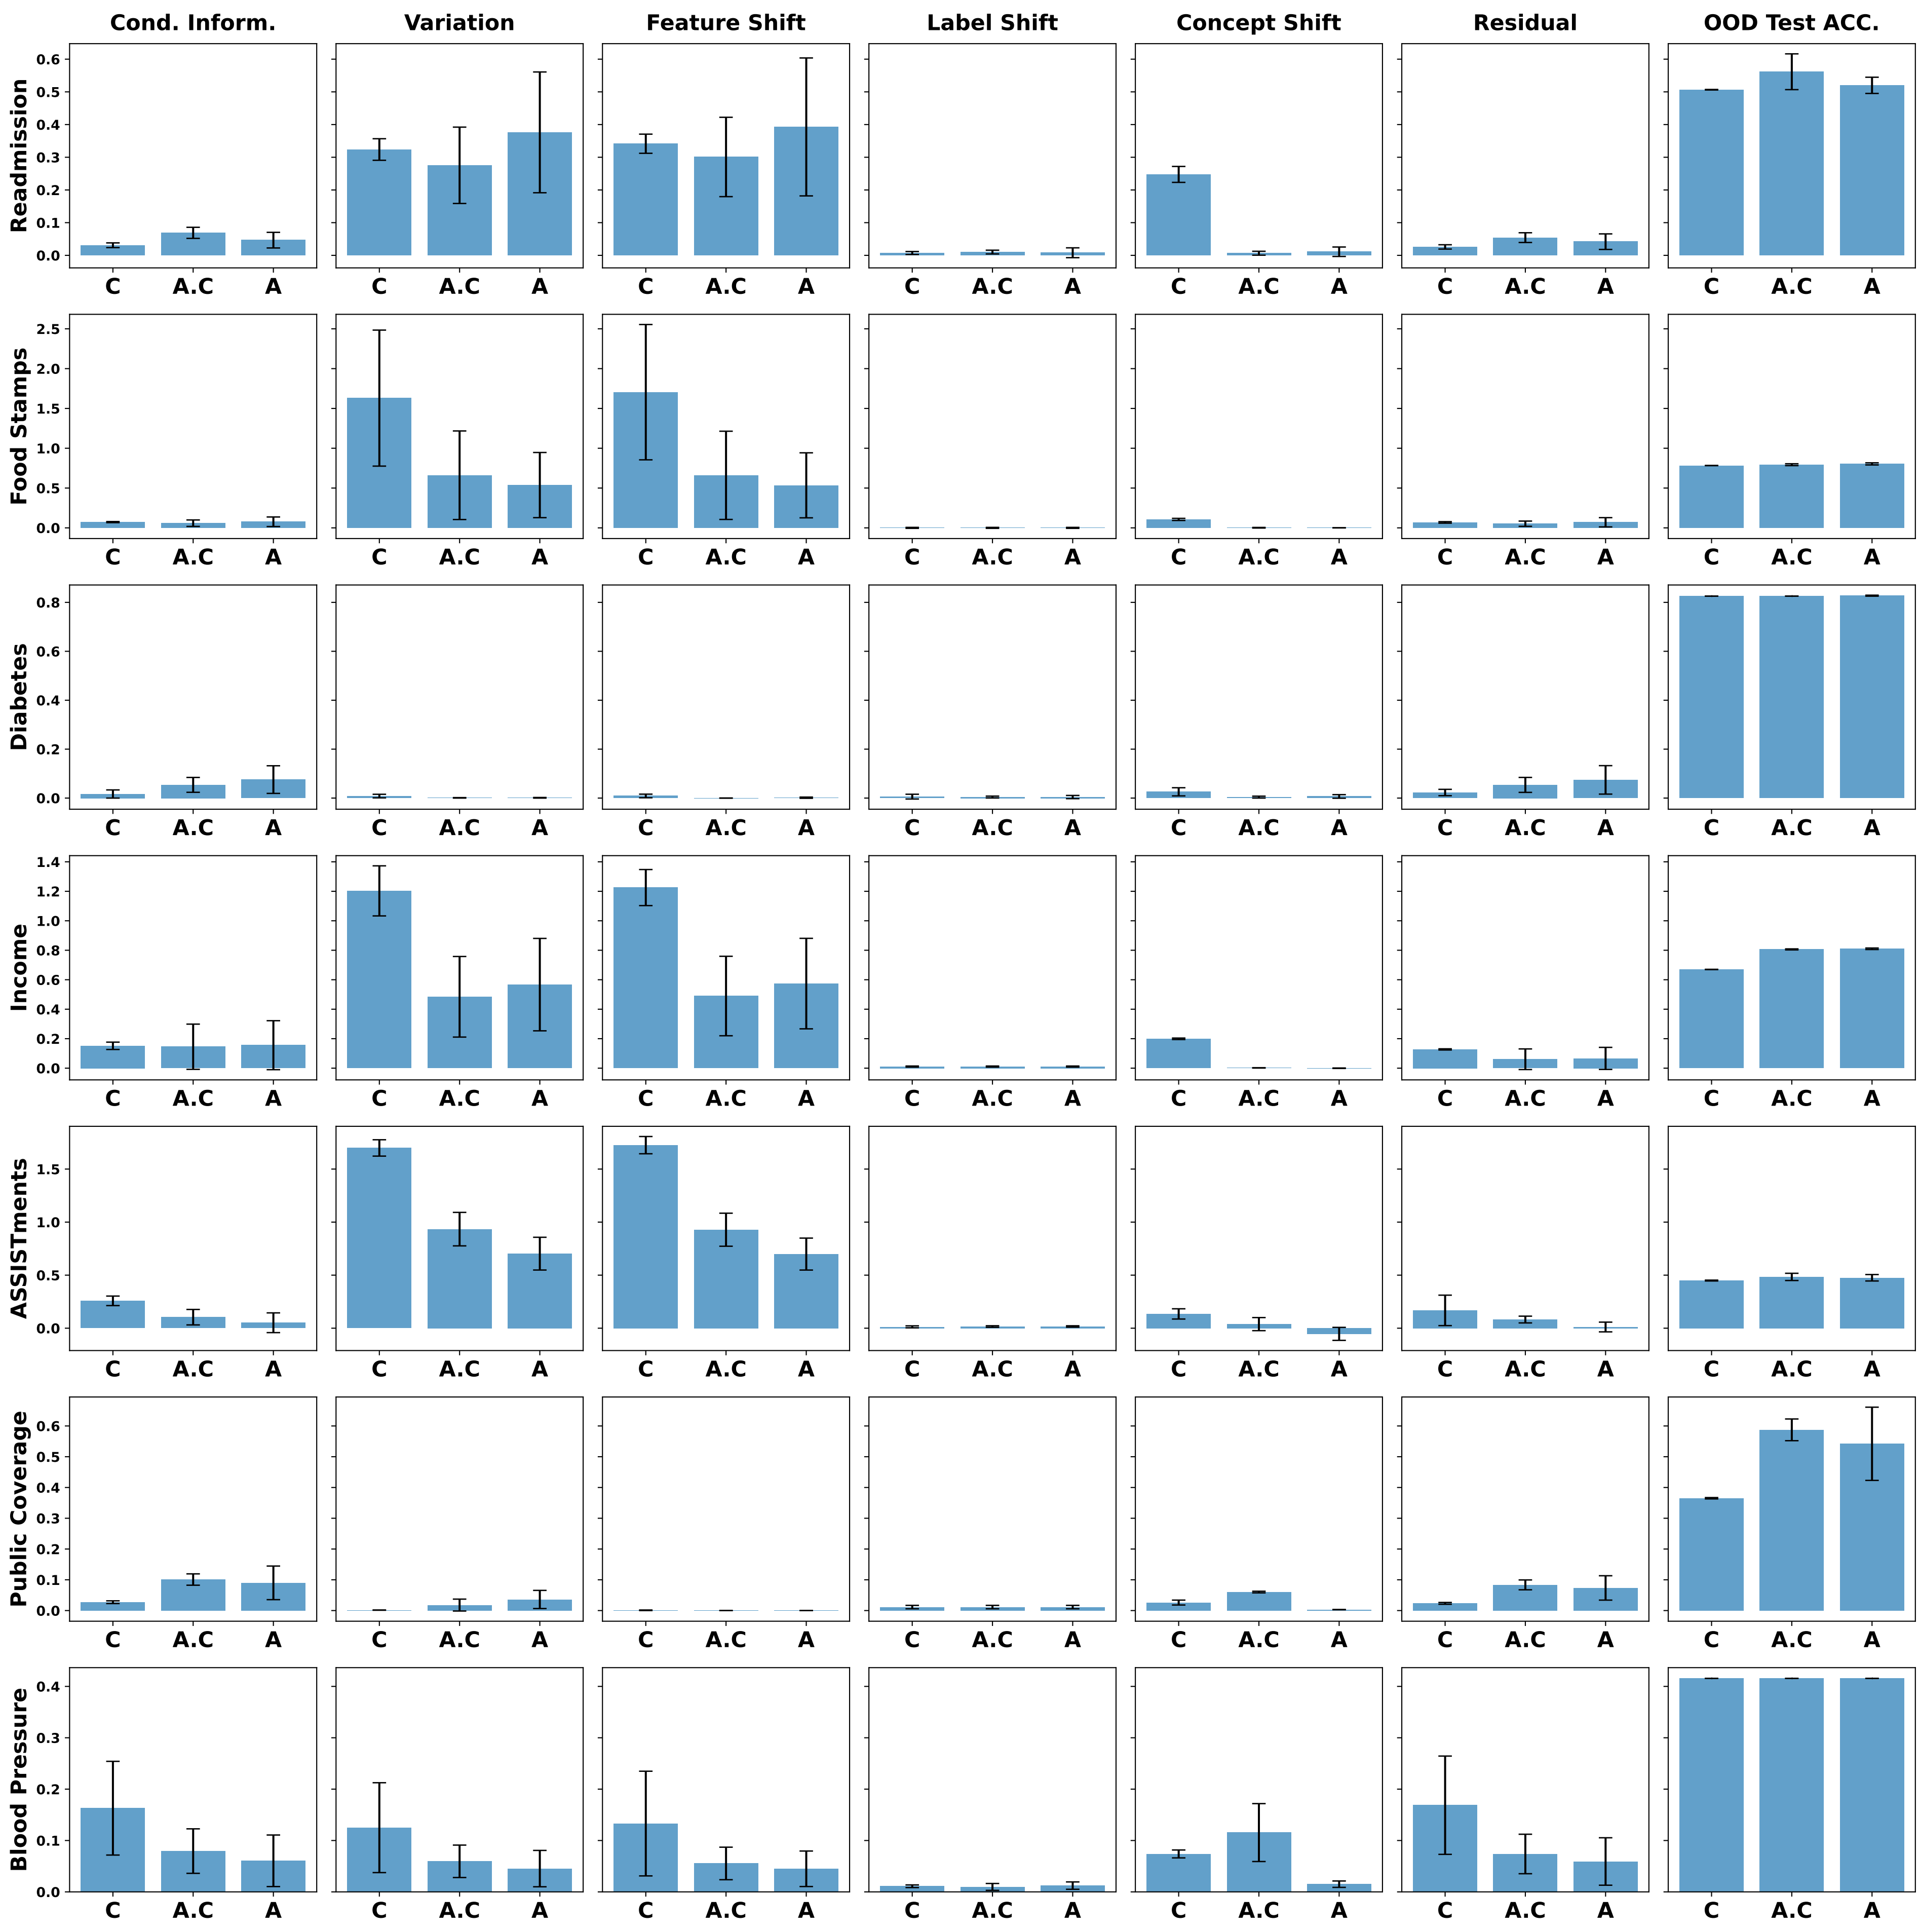

Supplement: supplementary_material [file train_datashifts_mlp.pdf › code/realworld/results/hyperparamsetting/train_datashifts_mlp.pdf]

# Train Data Shifts - VREX

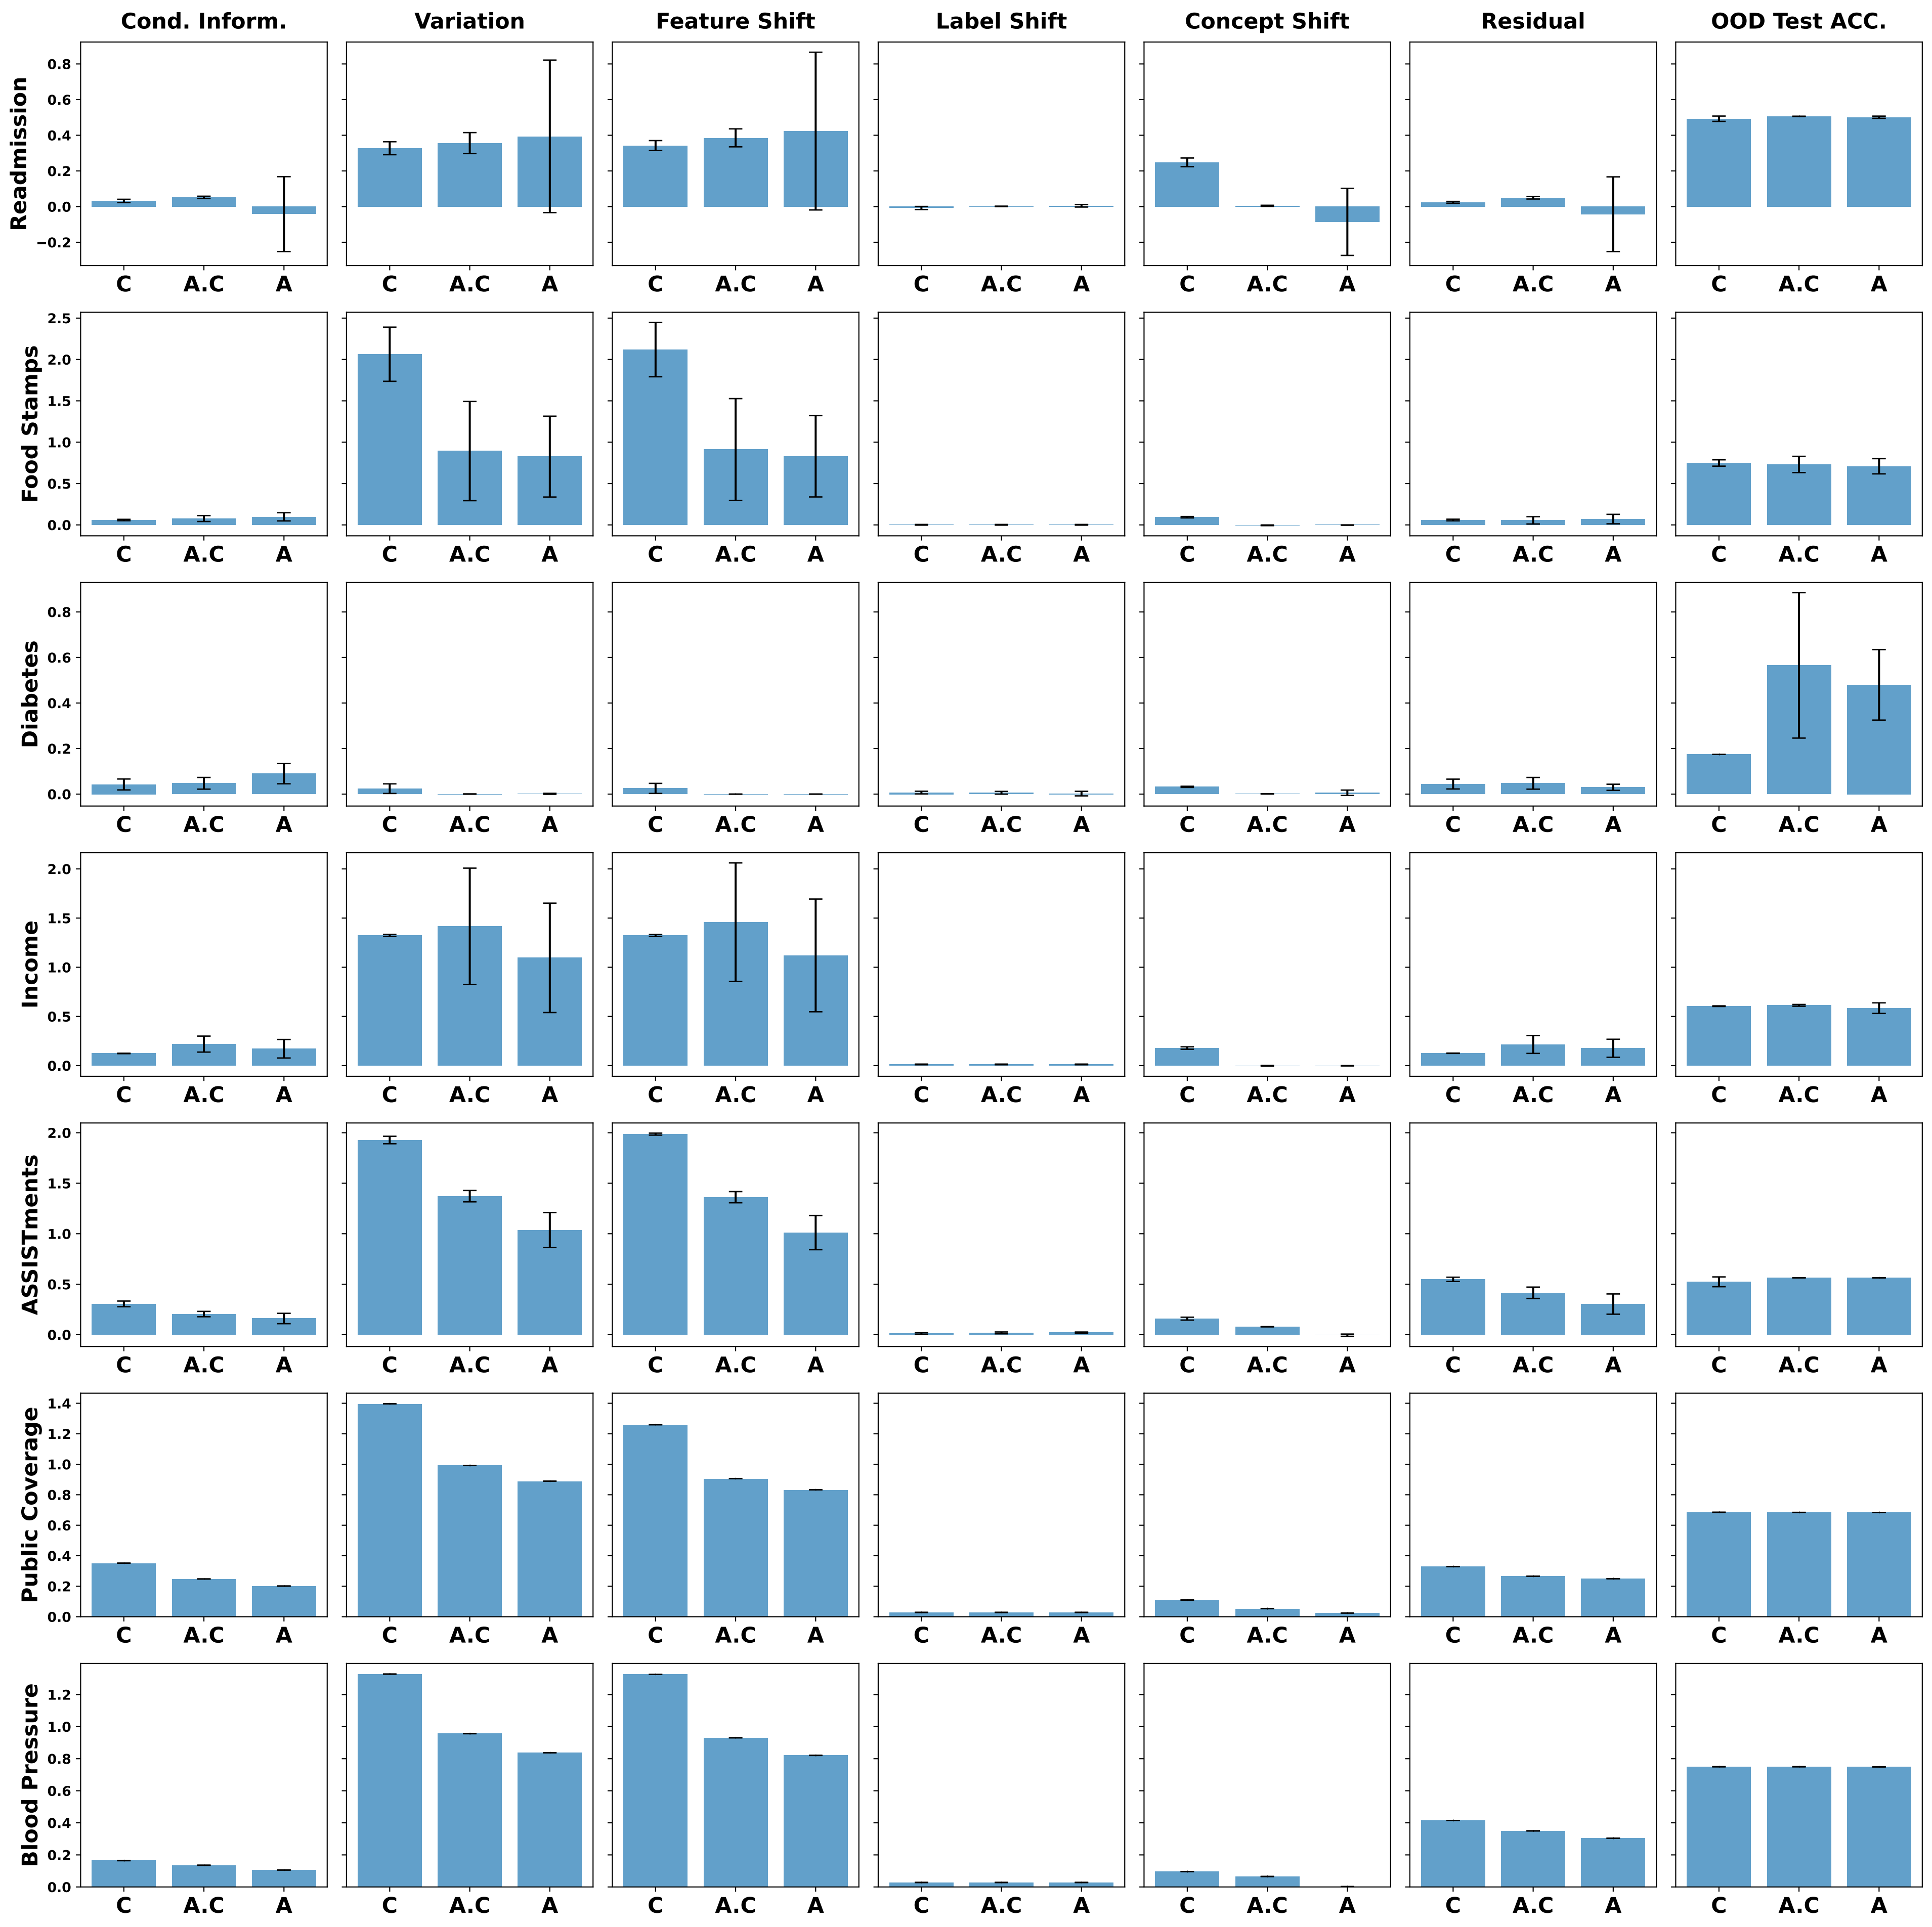

Supplement: supplementary_material [file train_datashifts_vrex.pdf › code/realworld/results/hyperparamsetting/train_datashifts_vrex.pdf]

# Train Data Shifts - XGB

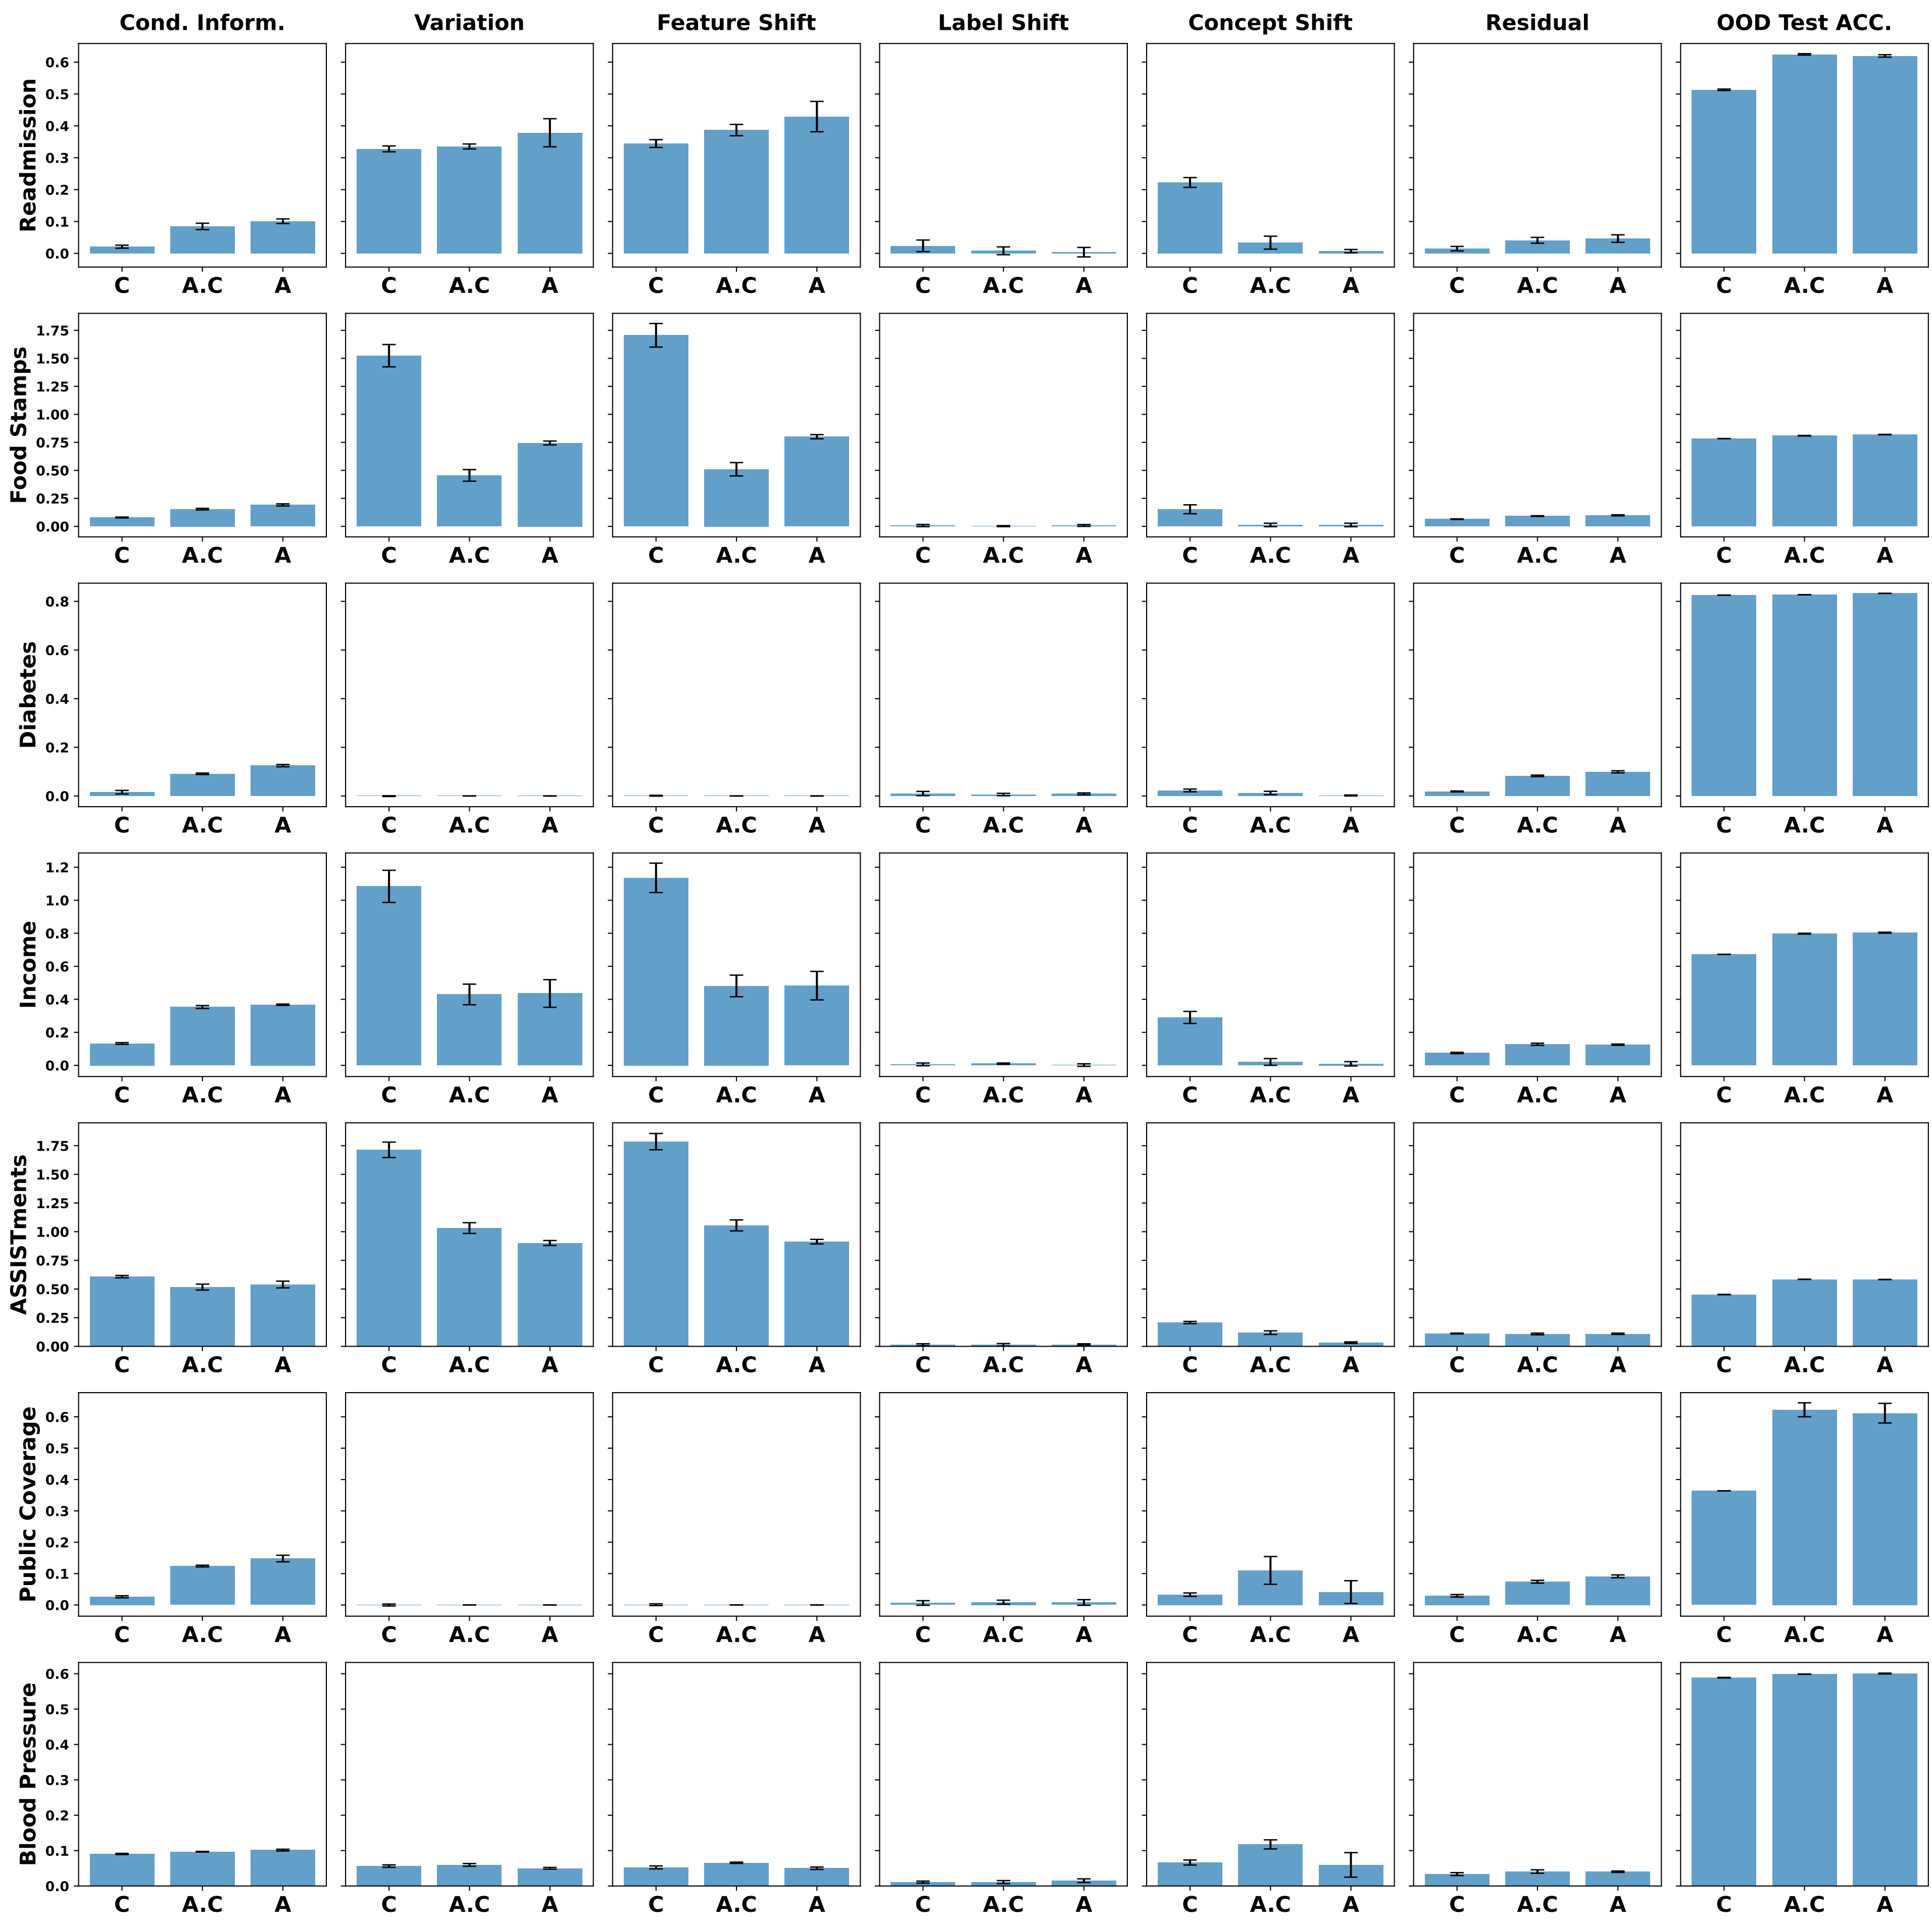

Supplement: supplementary_material [file train_datashifts_xgb.pdf › code/realworld/results/hyperparamsetting/train_datashifts_xgb.pdf]

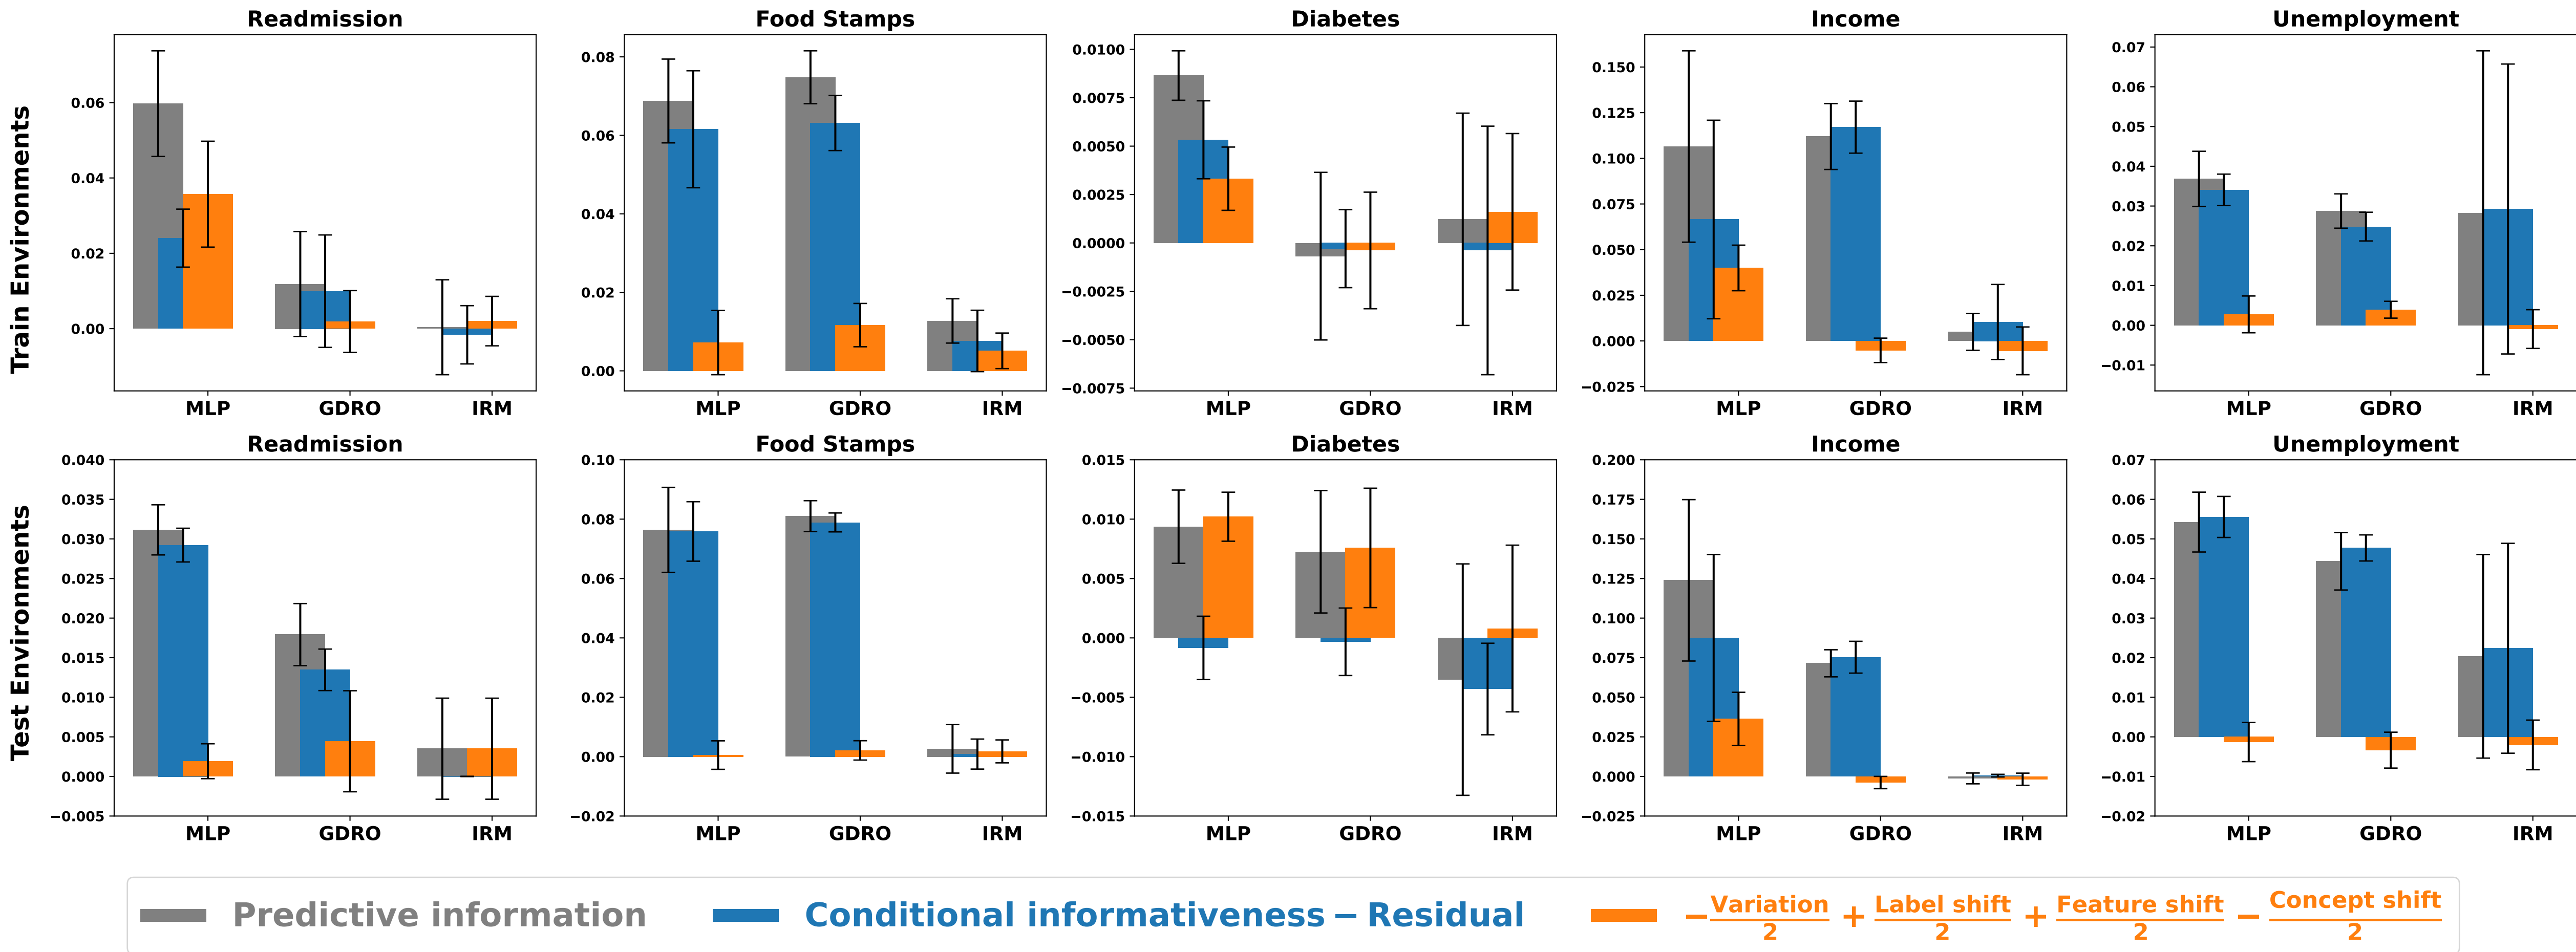

Supplement: supplementary_material [file combined_shiftdifferences_datasets.pdf › code/realworld/results/hyperparamsetting_besthps/combined_shiftdifferences_datasets.pdf]

### In-domain: Avg. Over Datasets

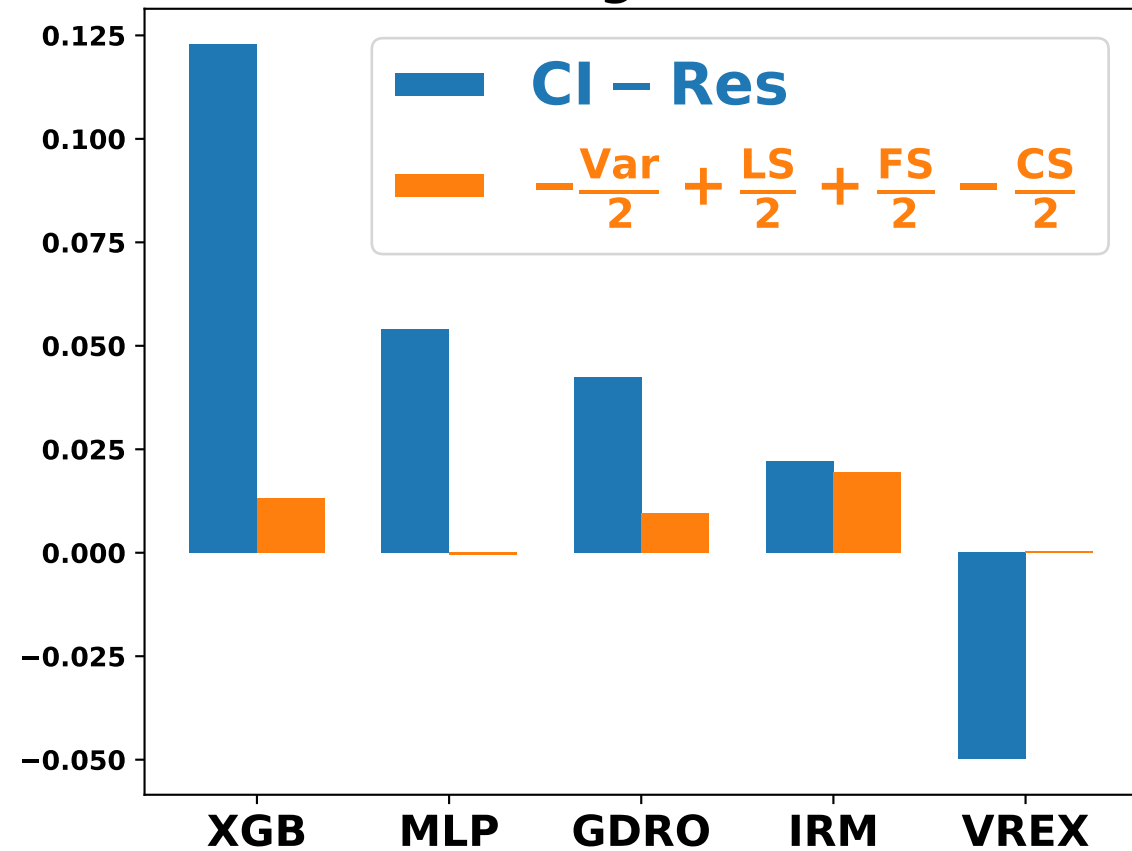

### Out-of-domain: Avg. Over Datasets

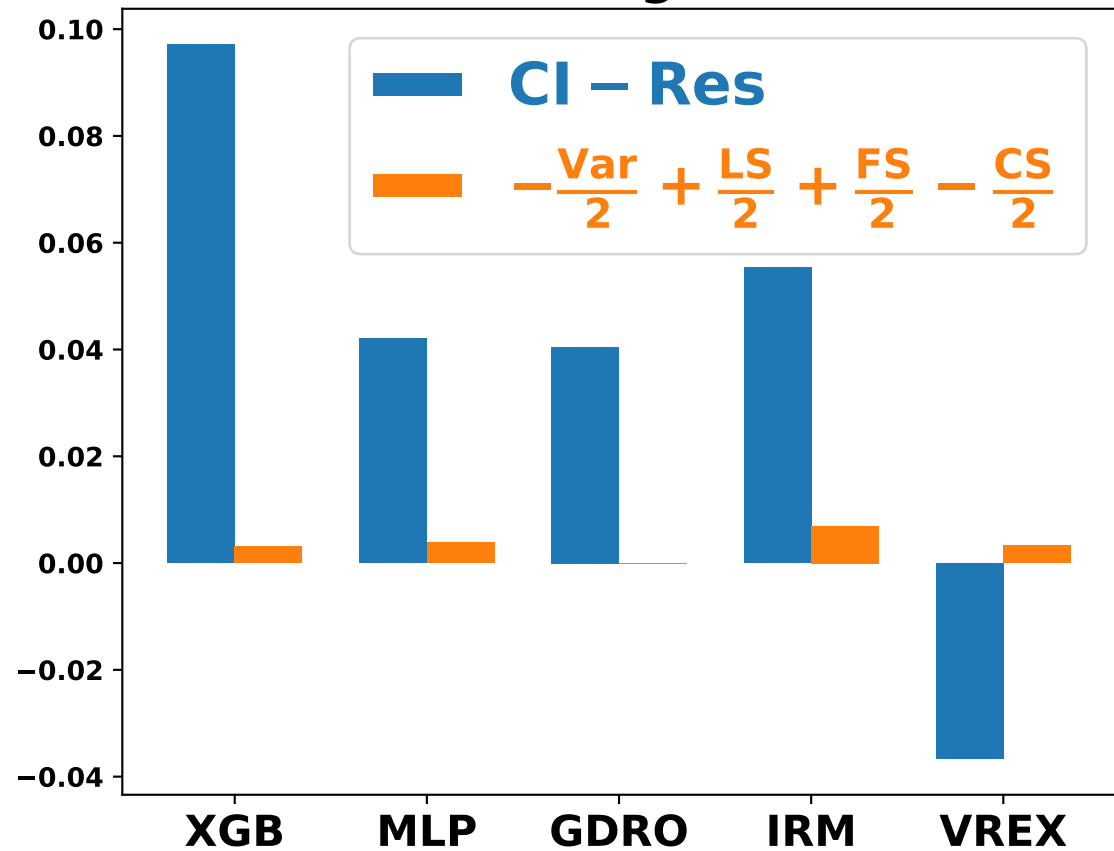

Supplement: supplementary_material [file shiftdifferences.pdf › code/realworld/results/informative/shiftdifferences.pdf]

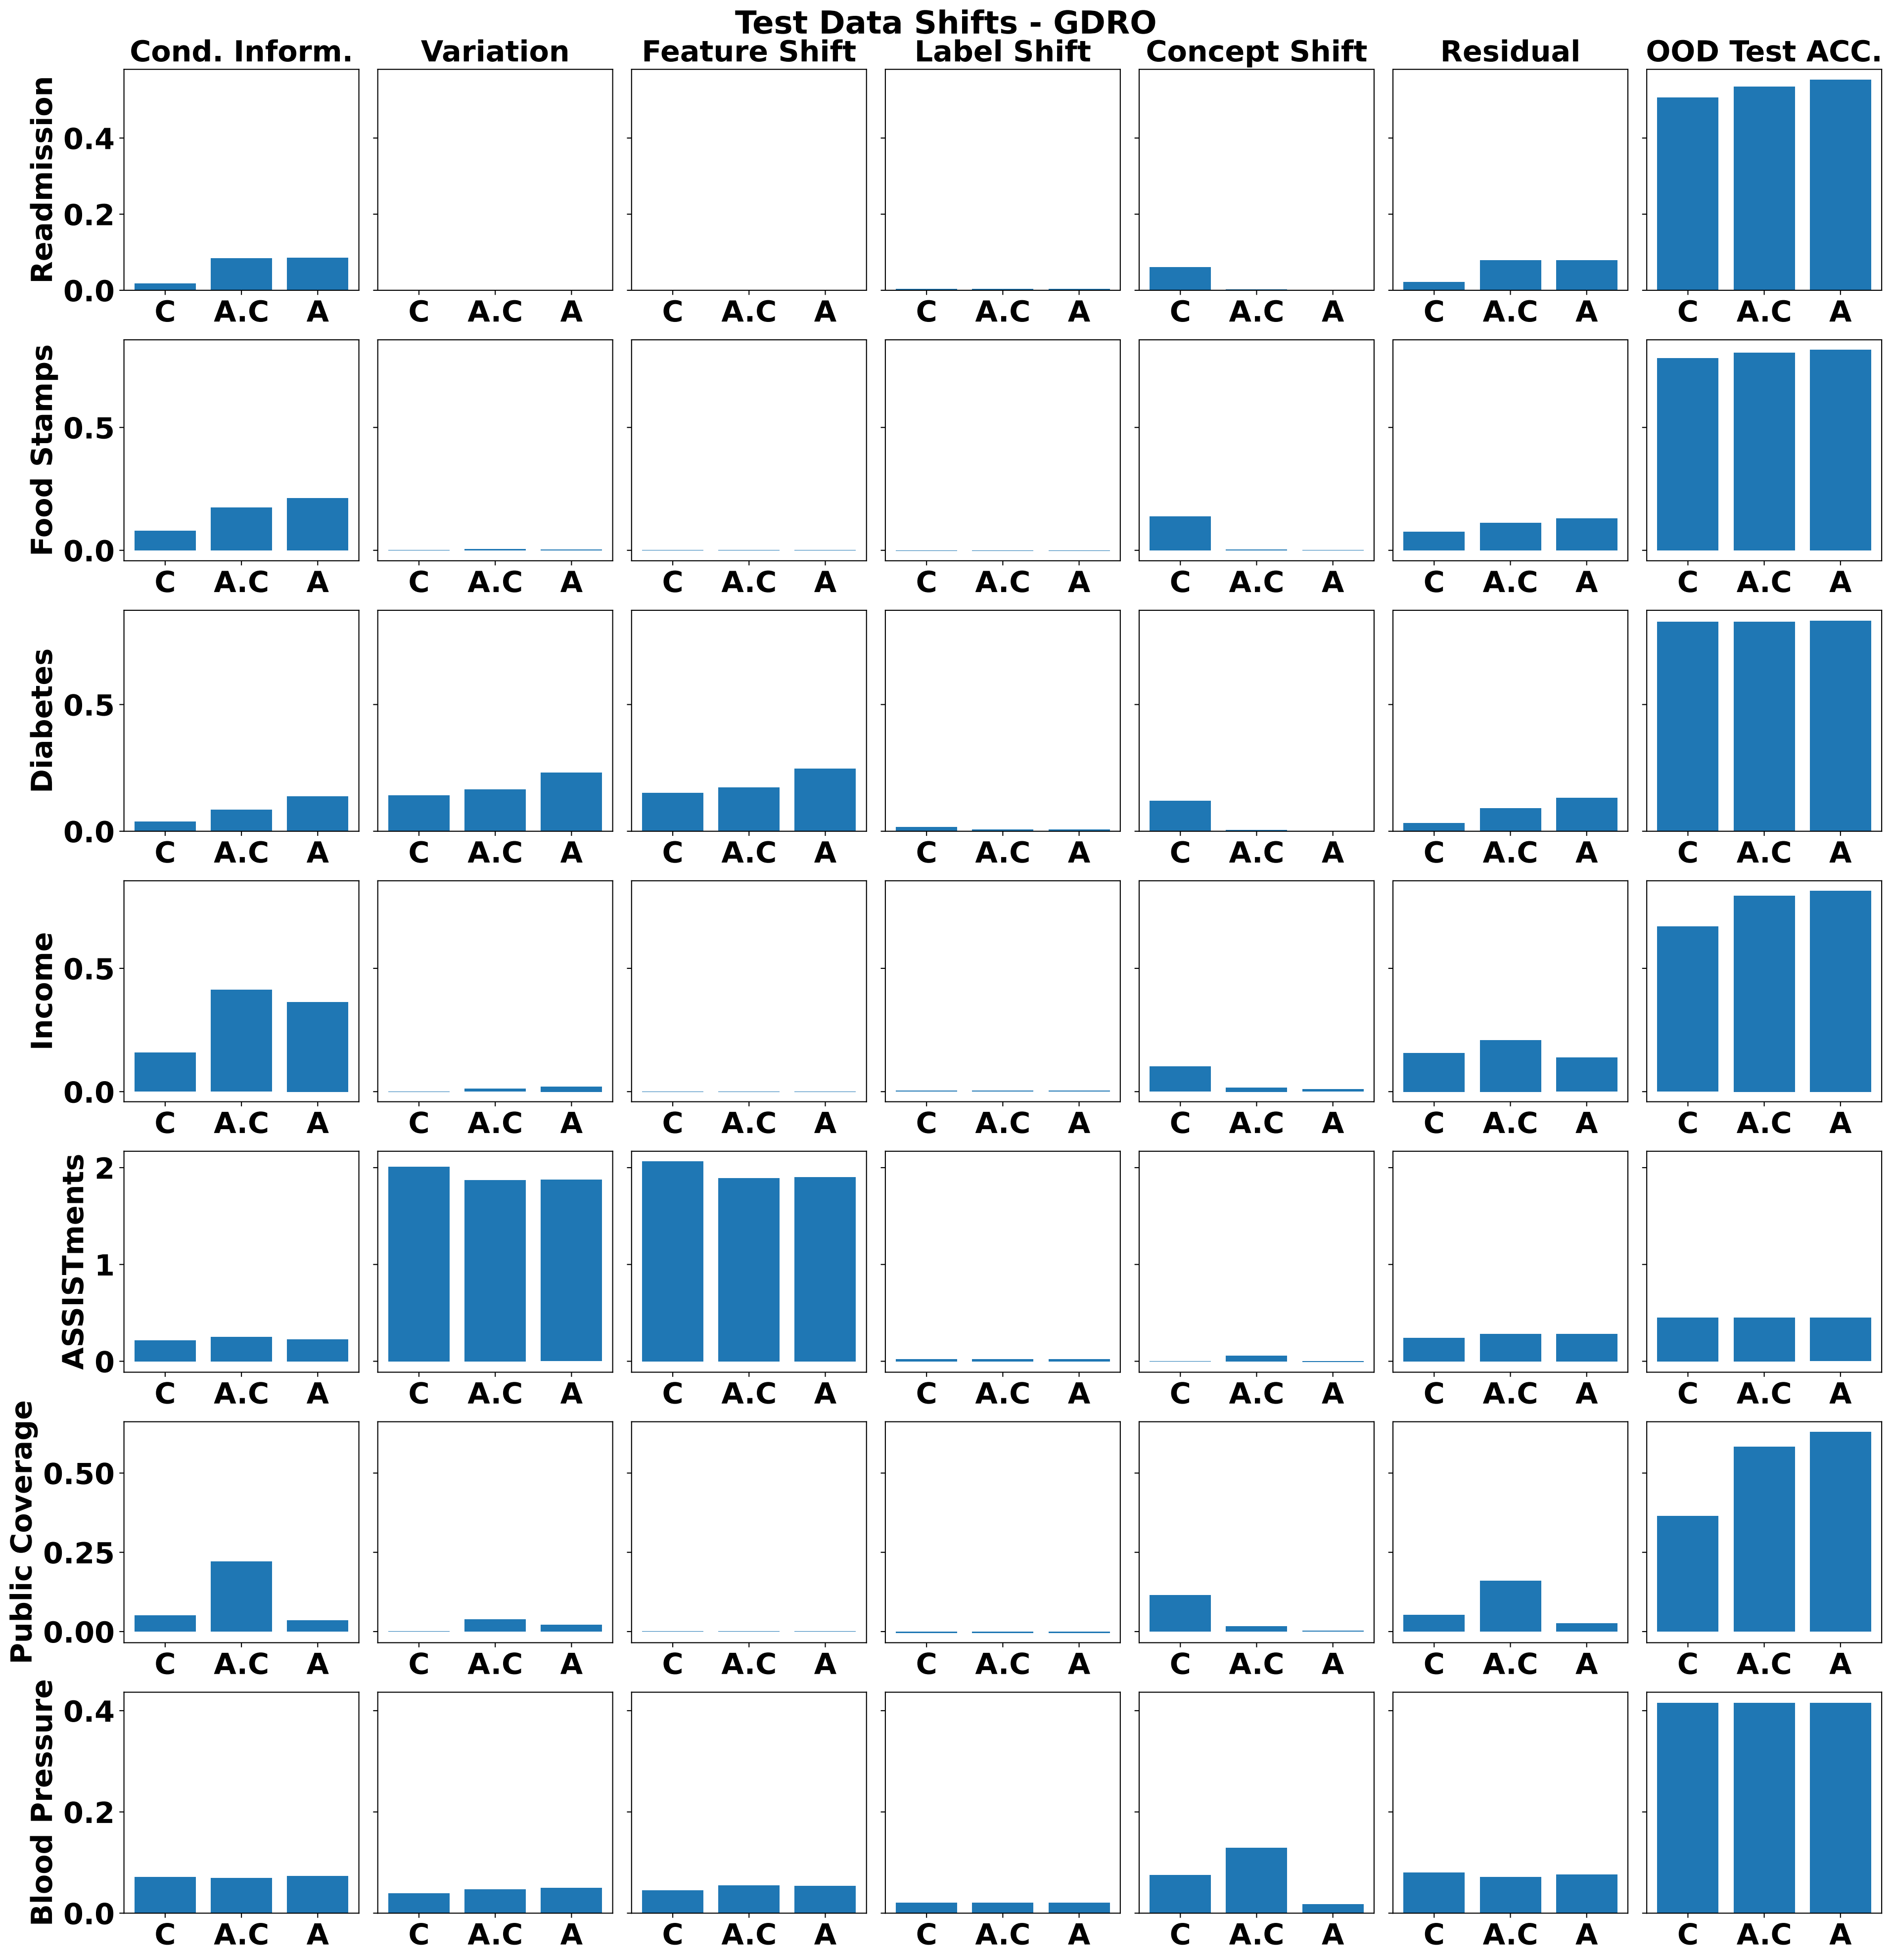

Supplement: supplementary_material [file test_datashifts_group_dro.pdf › code/realworld/results/informative/test_datashifts_group_dro.pdf]

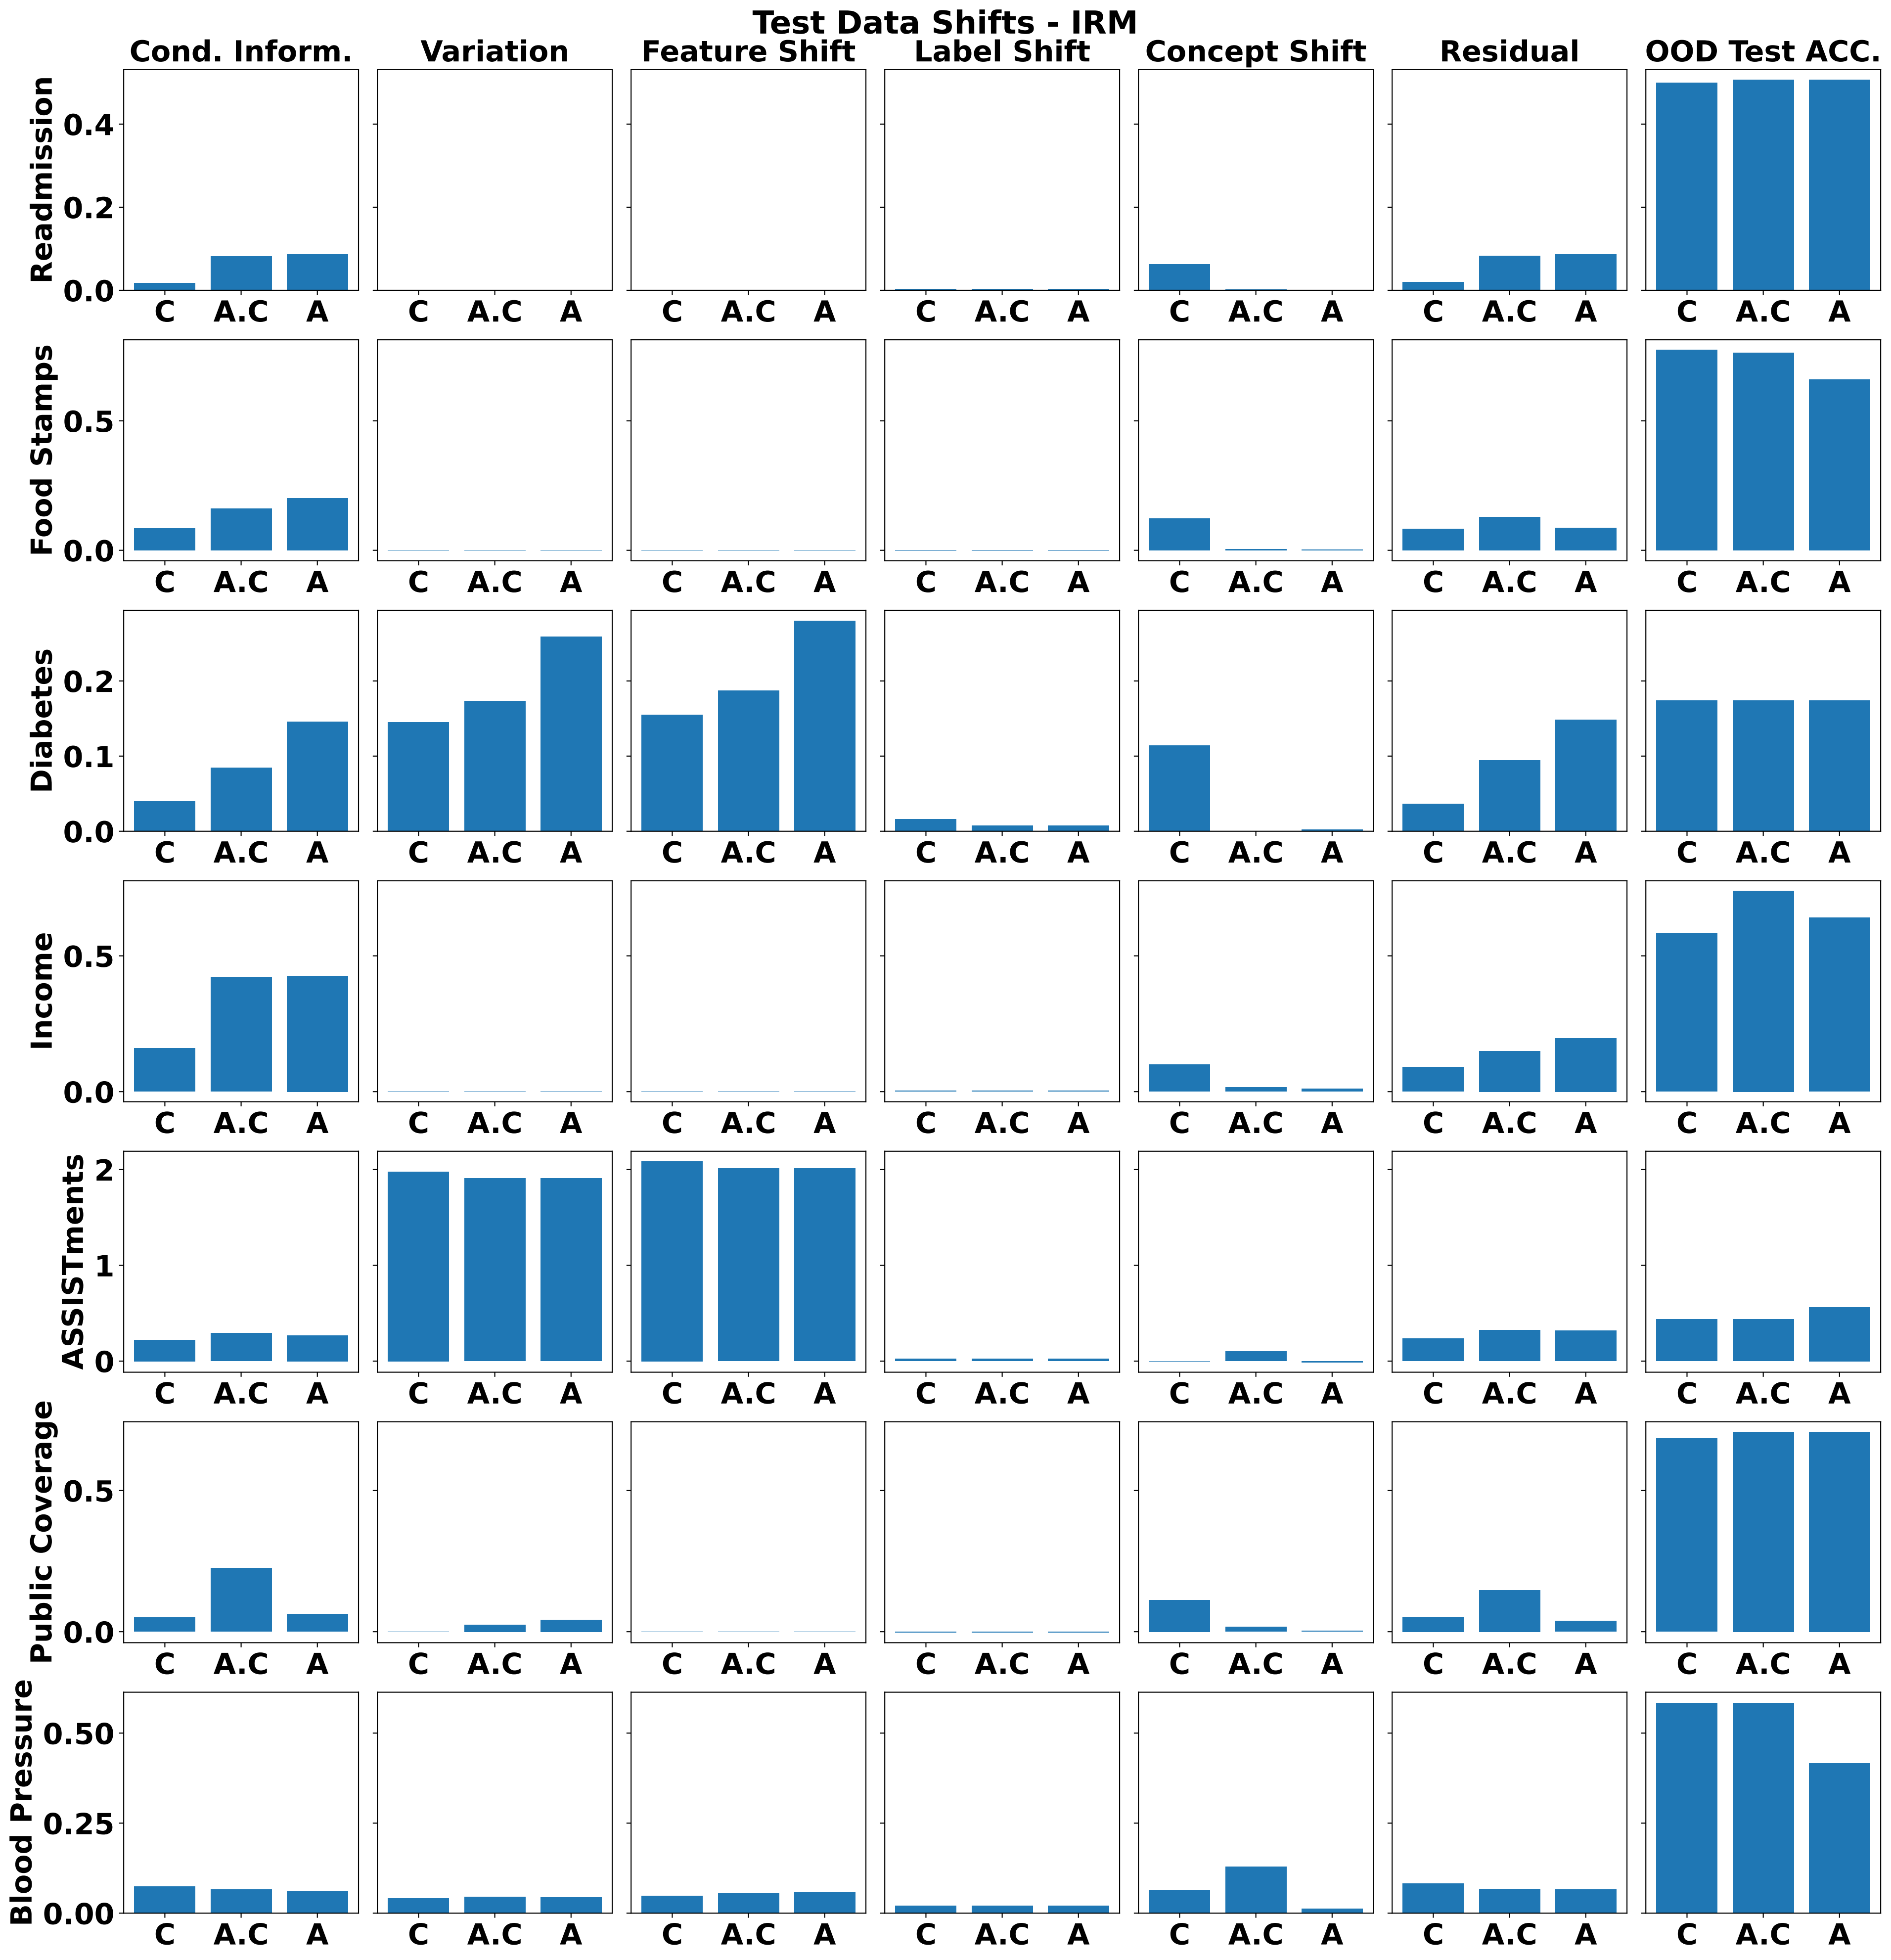

Supplement: supplementary_material [file test_datashifts_irm.pdf › code/realworld/results/informative/test_datashifts_irm.pdf]

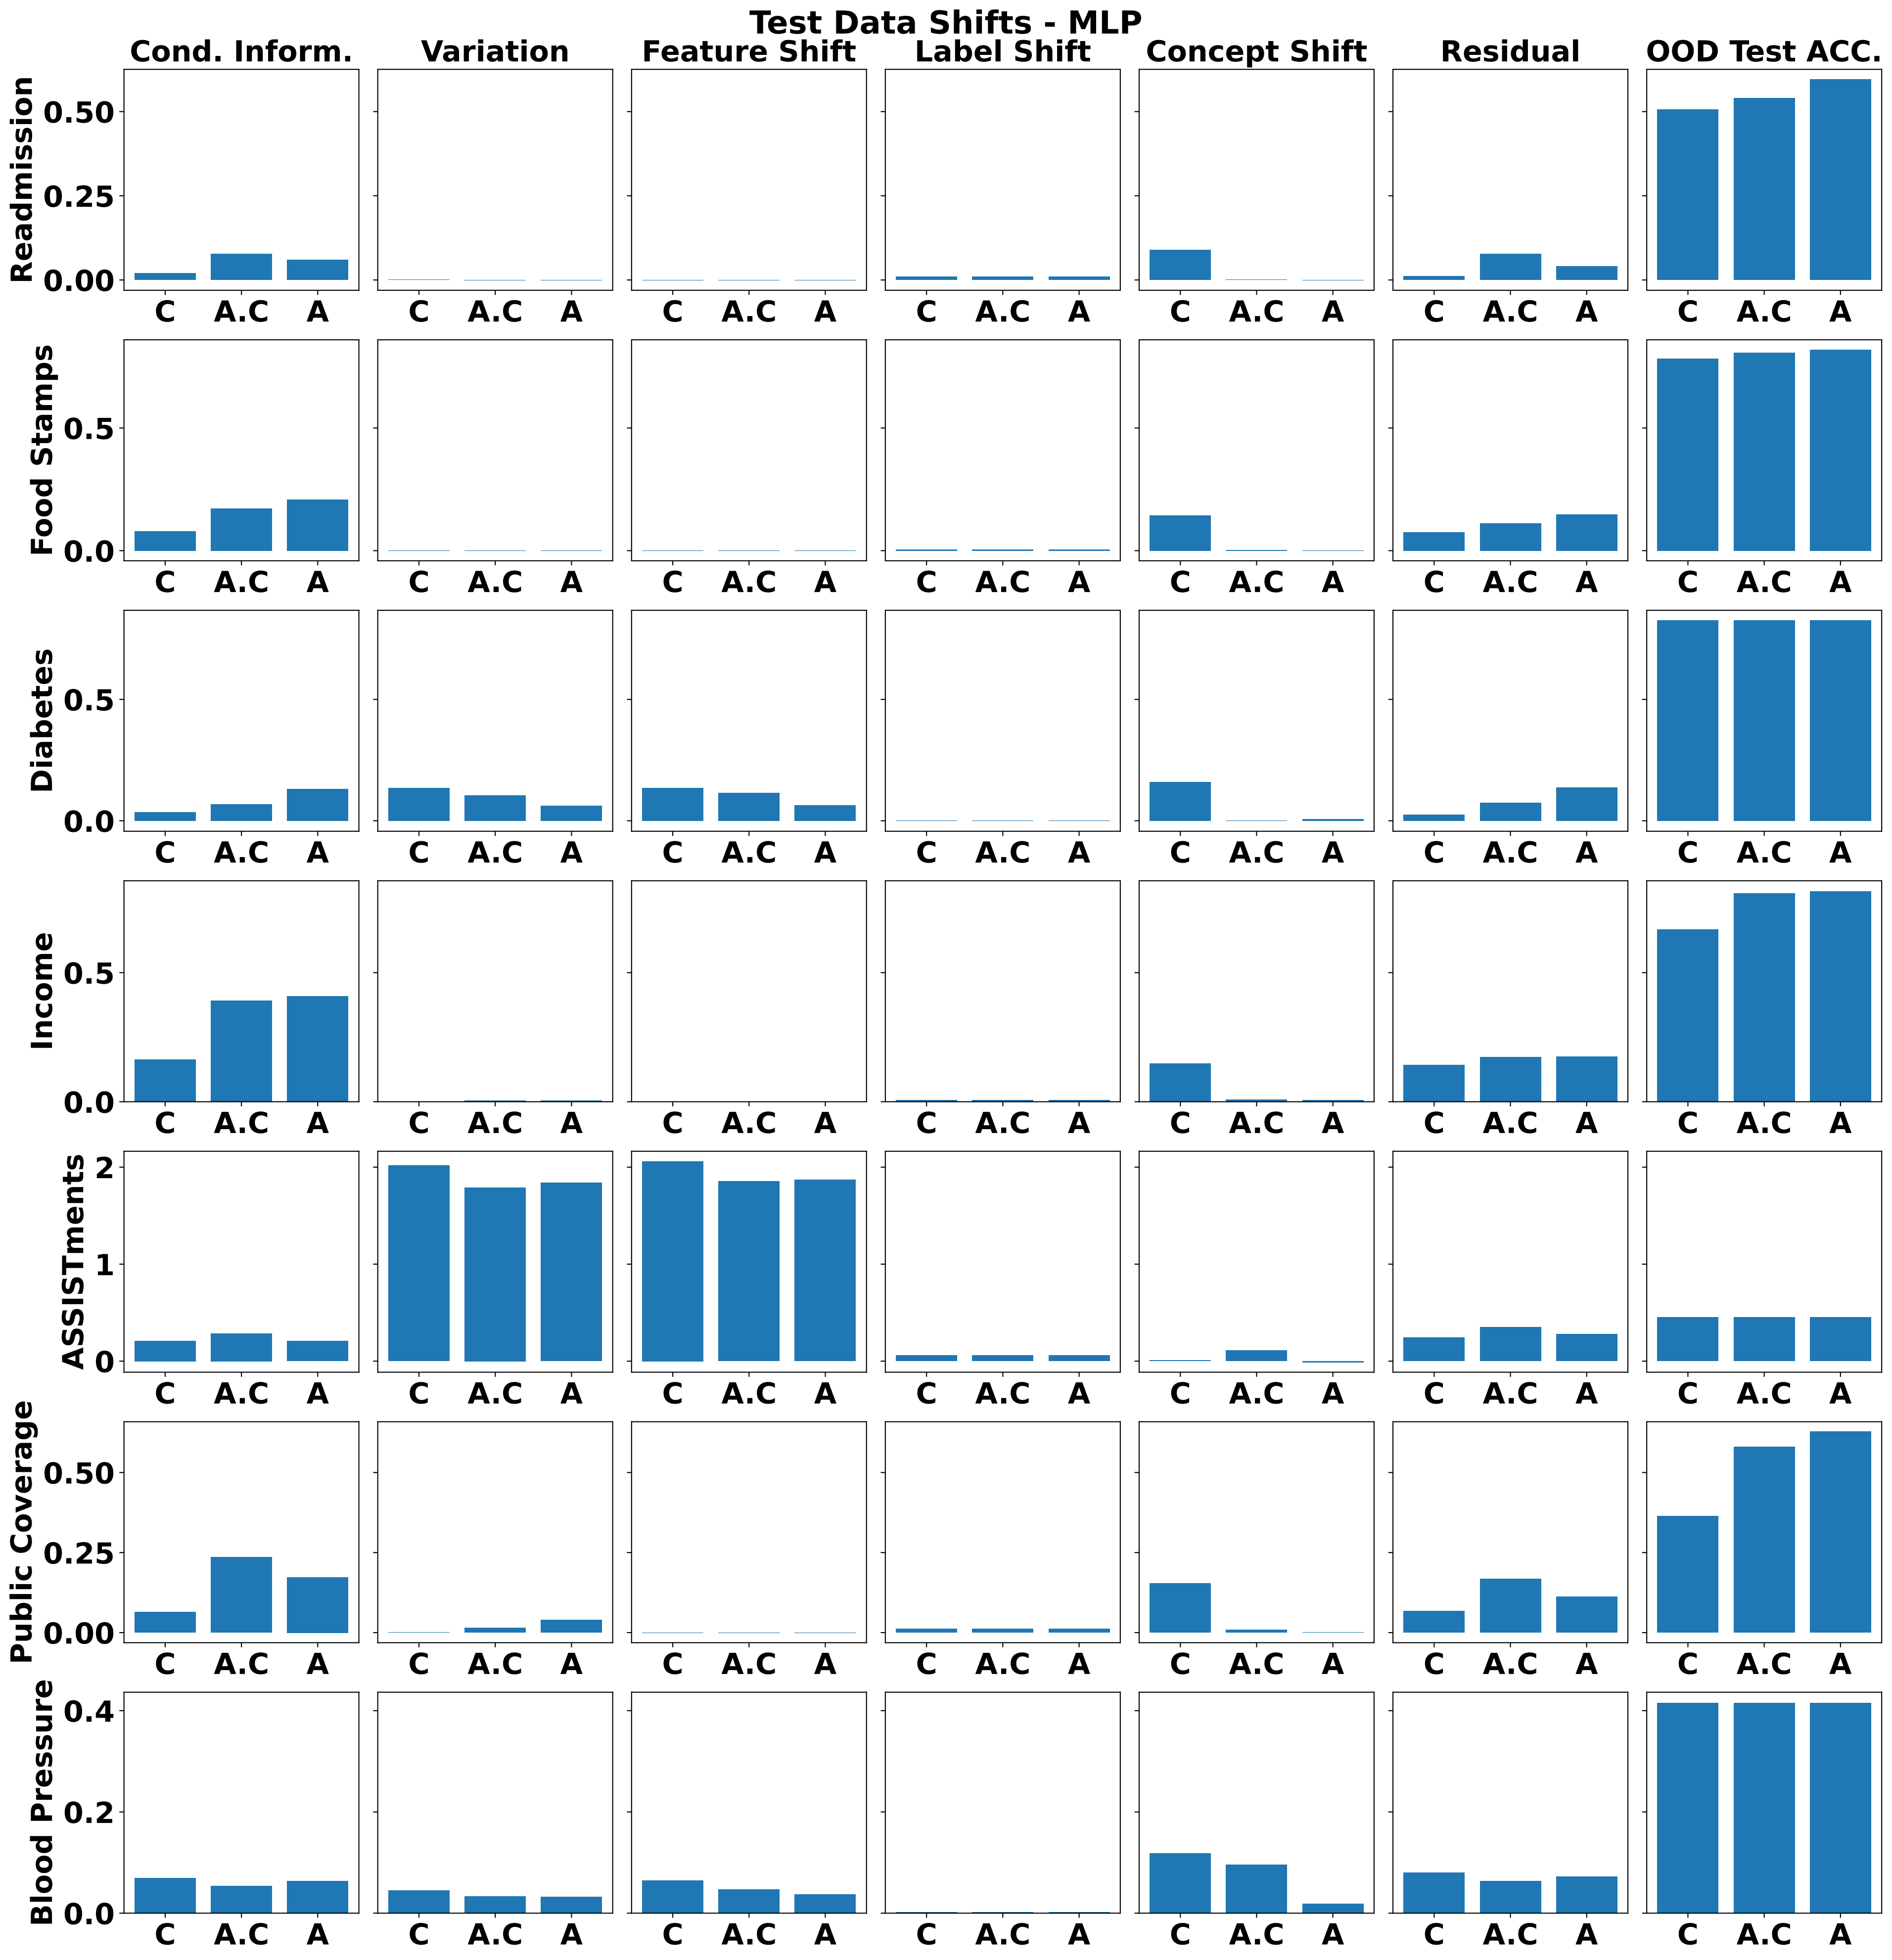

Supplement: supplementary_material [file test_datashifts_mlp.pdf › code/realworld/results/informative/test_datashifts_mlp.pdf]

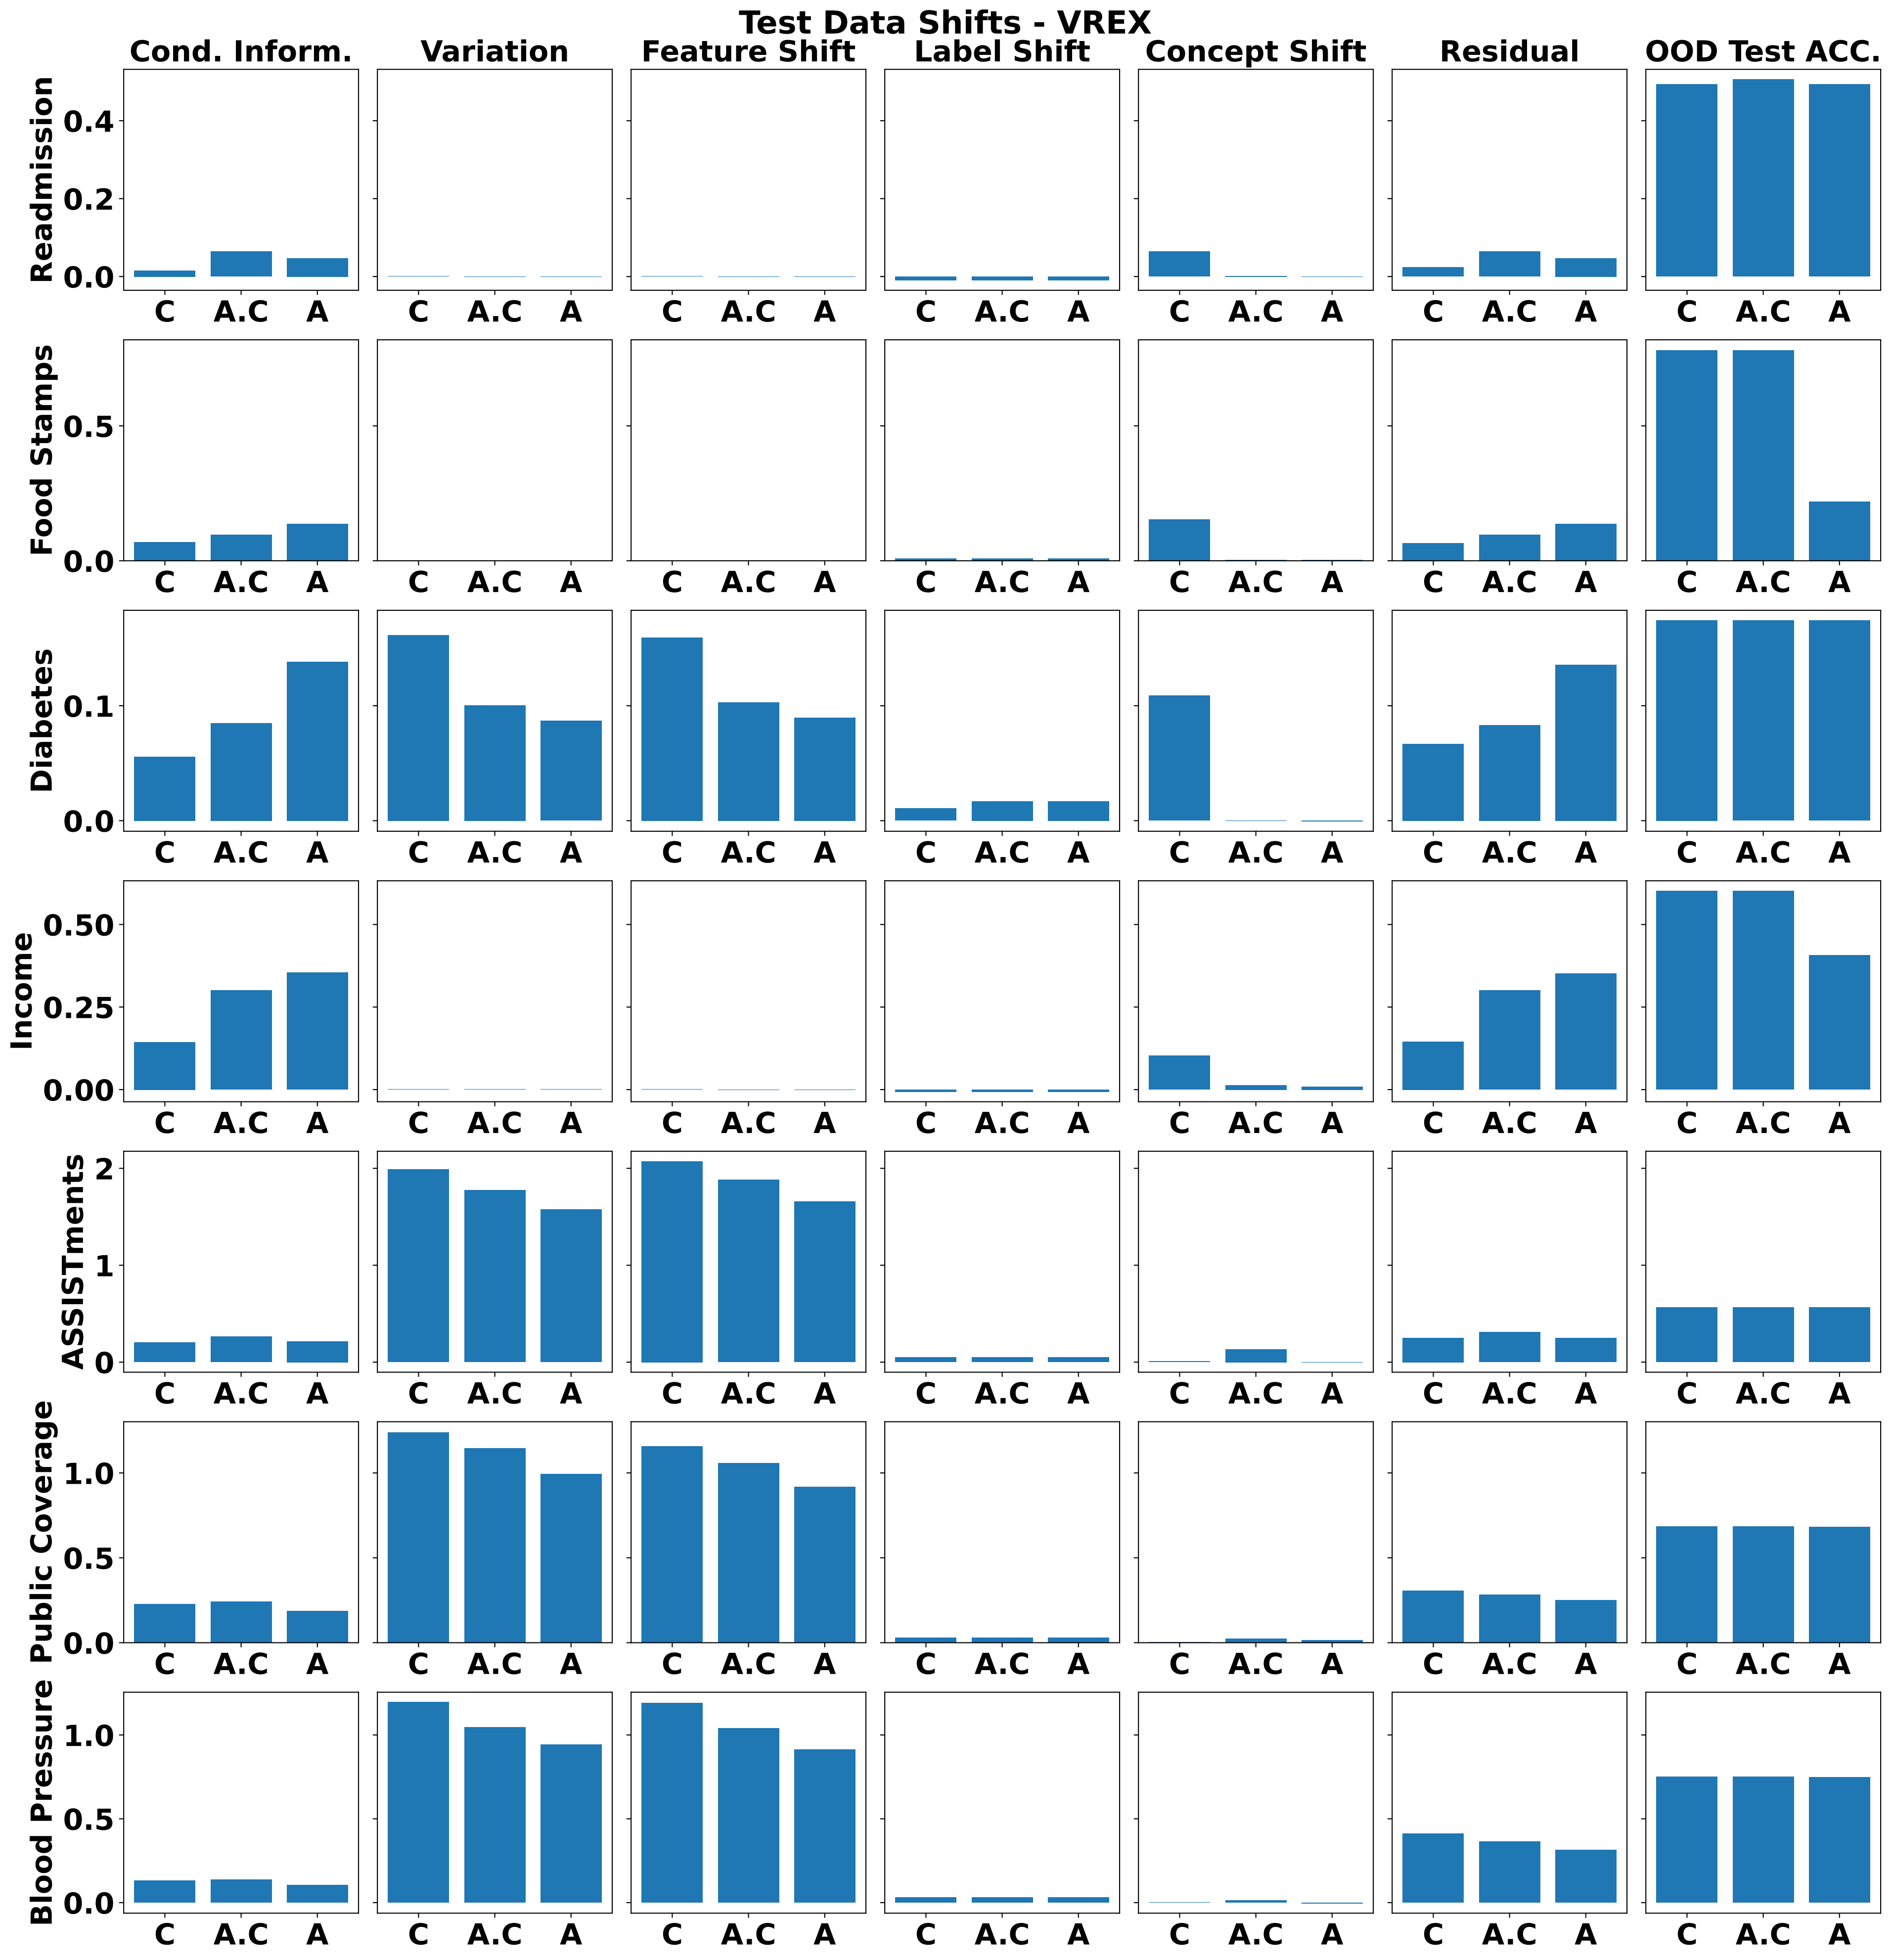

Supplement: supplementary_material [file test_datashifts_vrex.pdf › code/realworld/results/informative/test_datashifts_vrex.pdf]

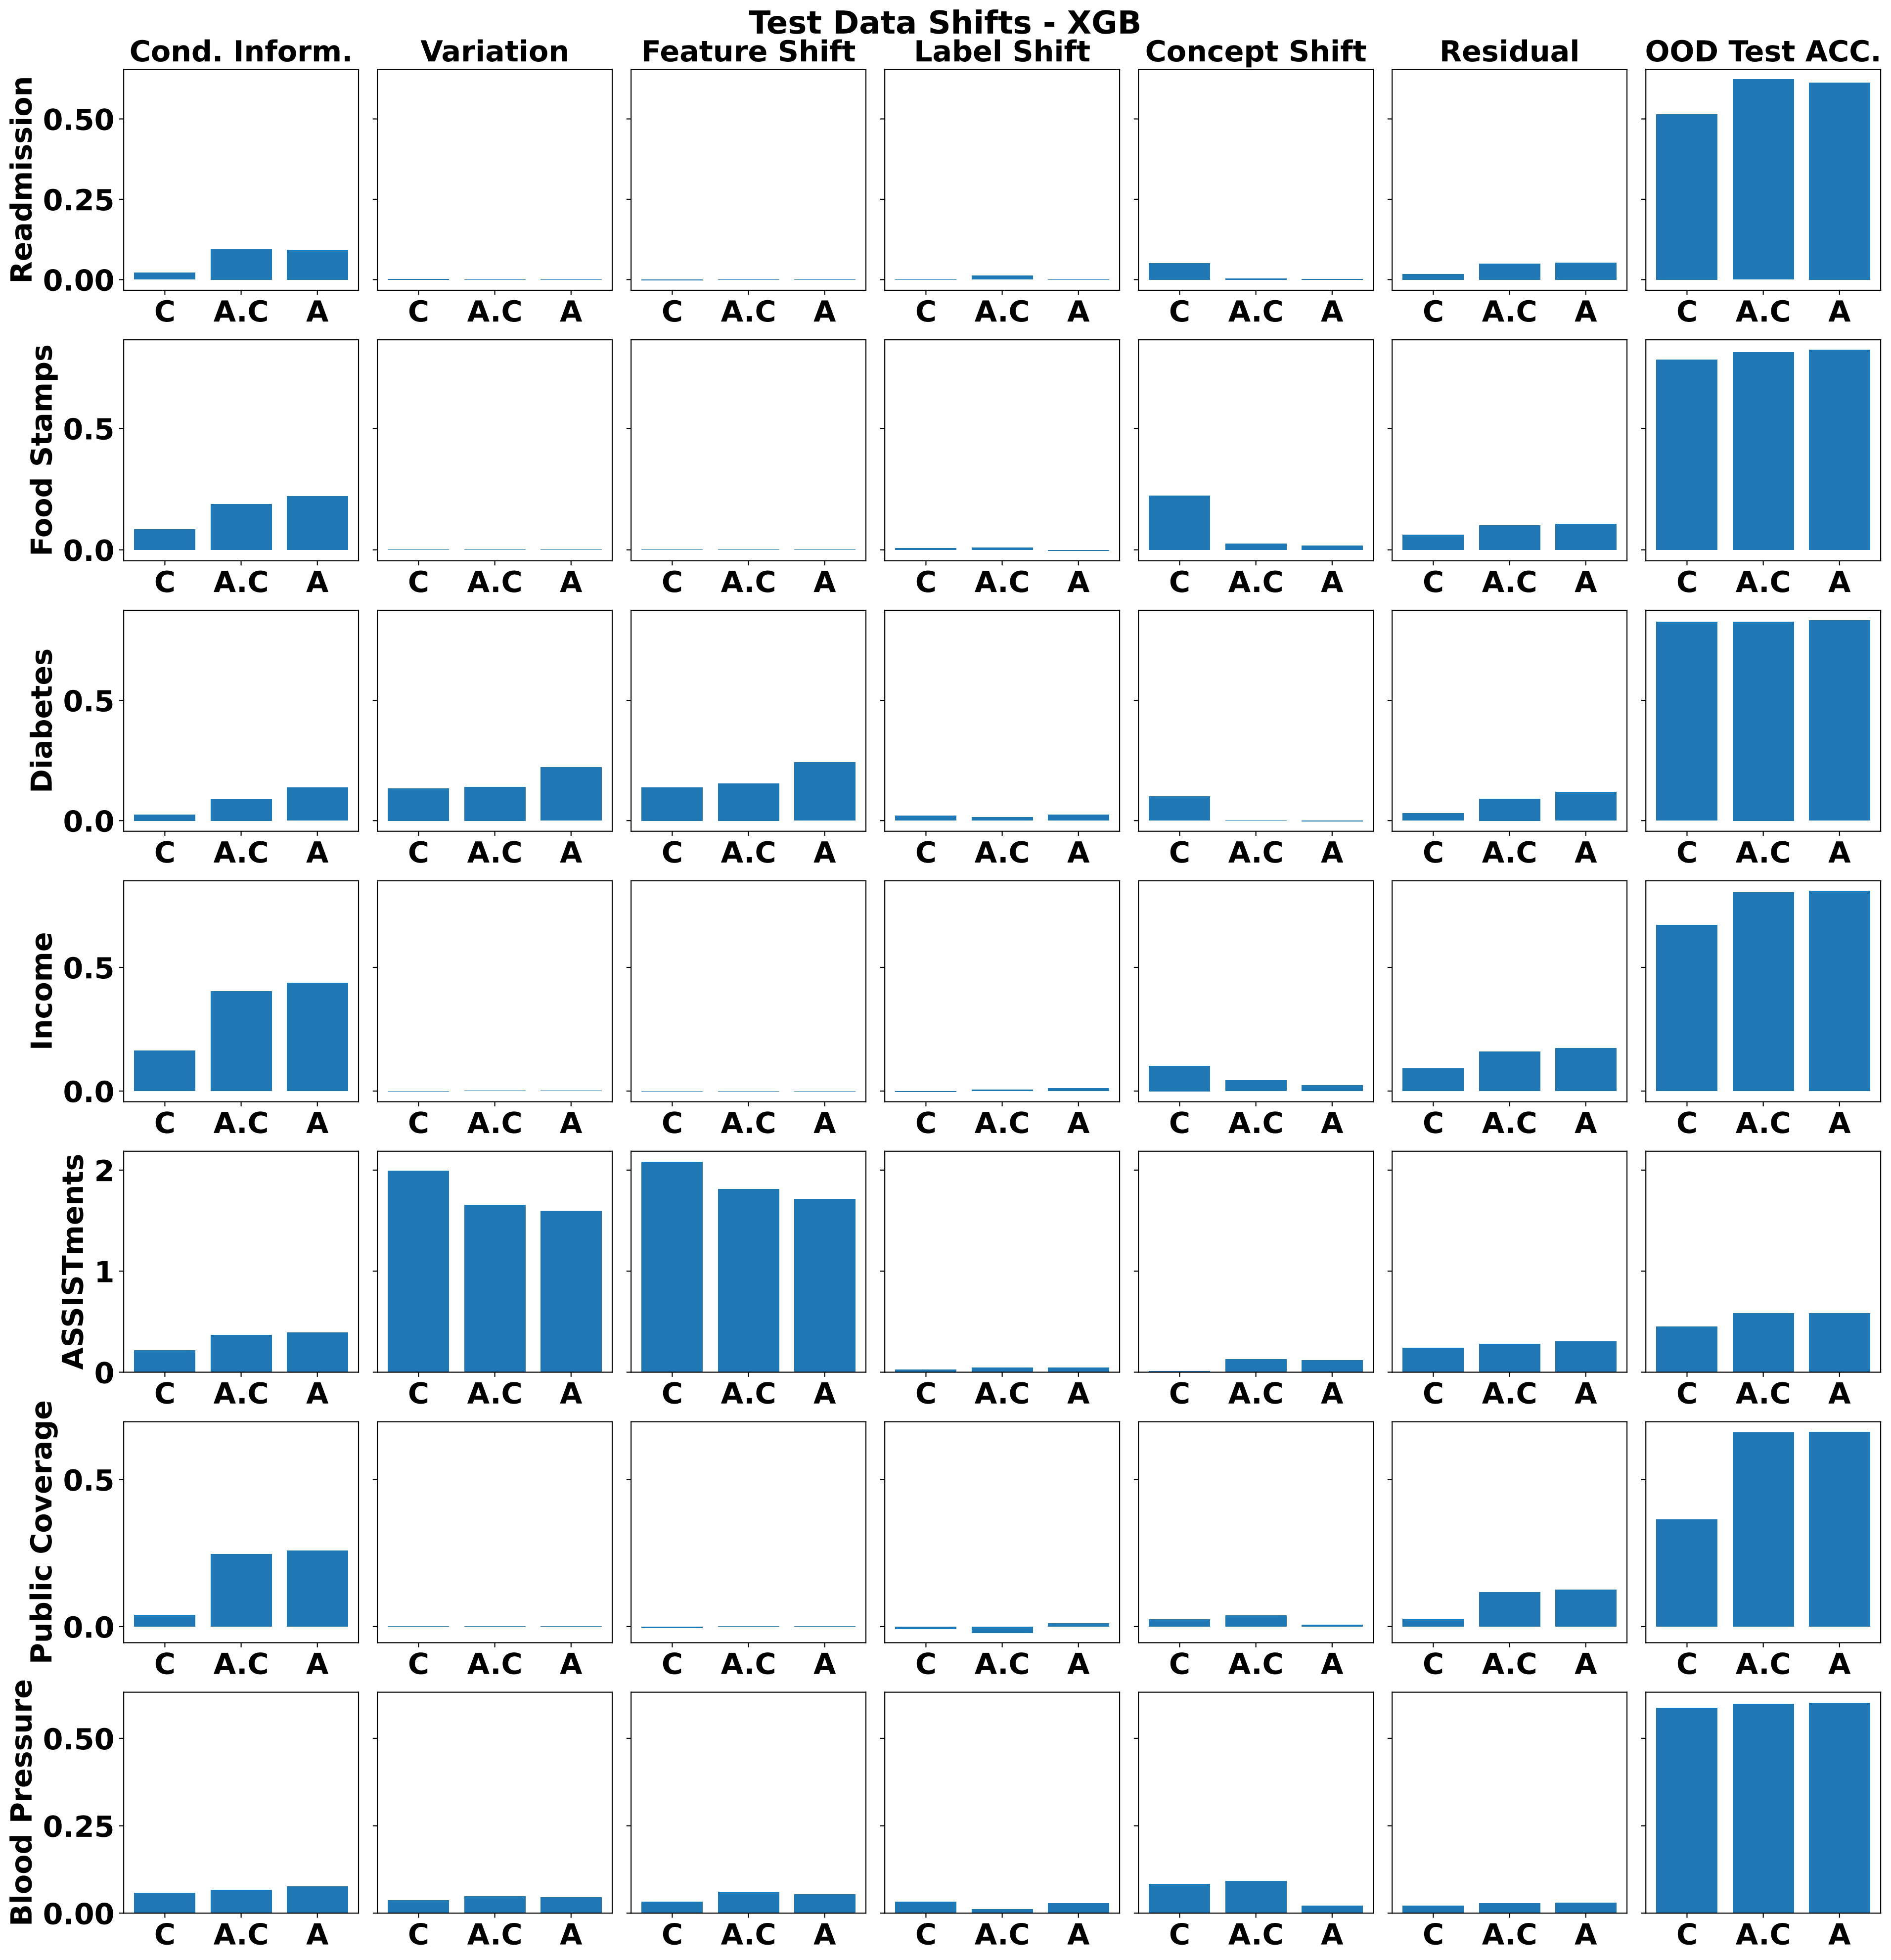

Supplement: supplementary_material [file test_datashifts_xgb.pdf › code/realworld/results/informative/test_datashifts_xgb.pdf]

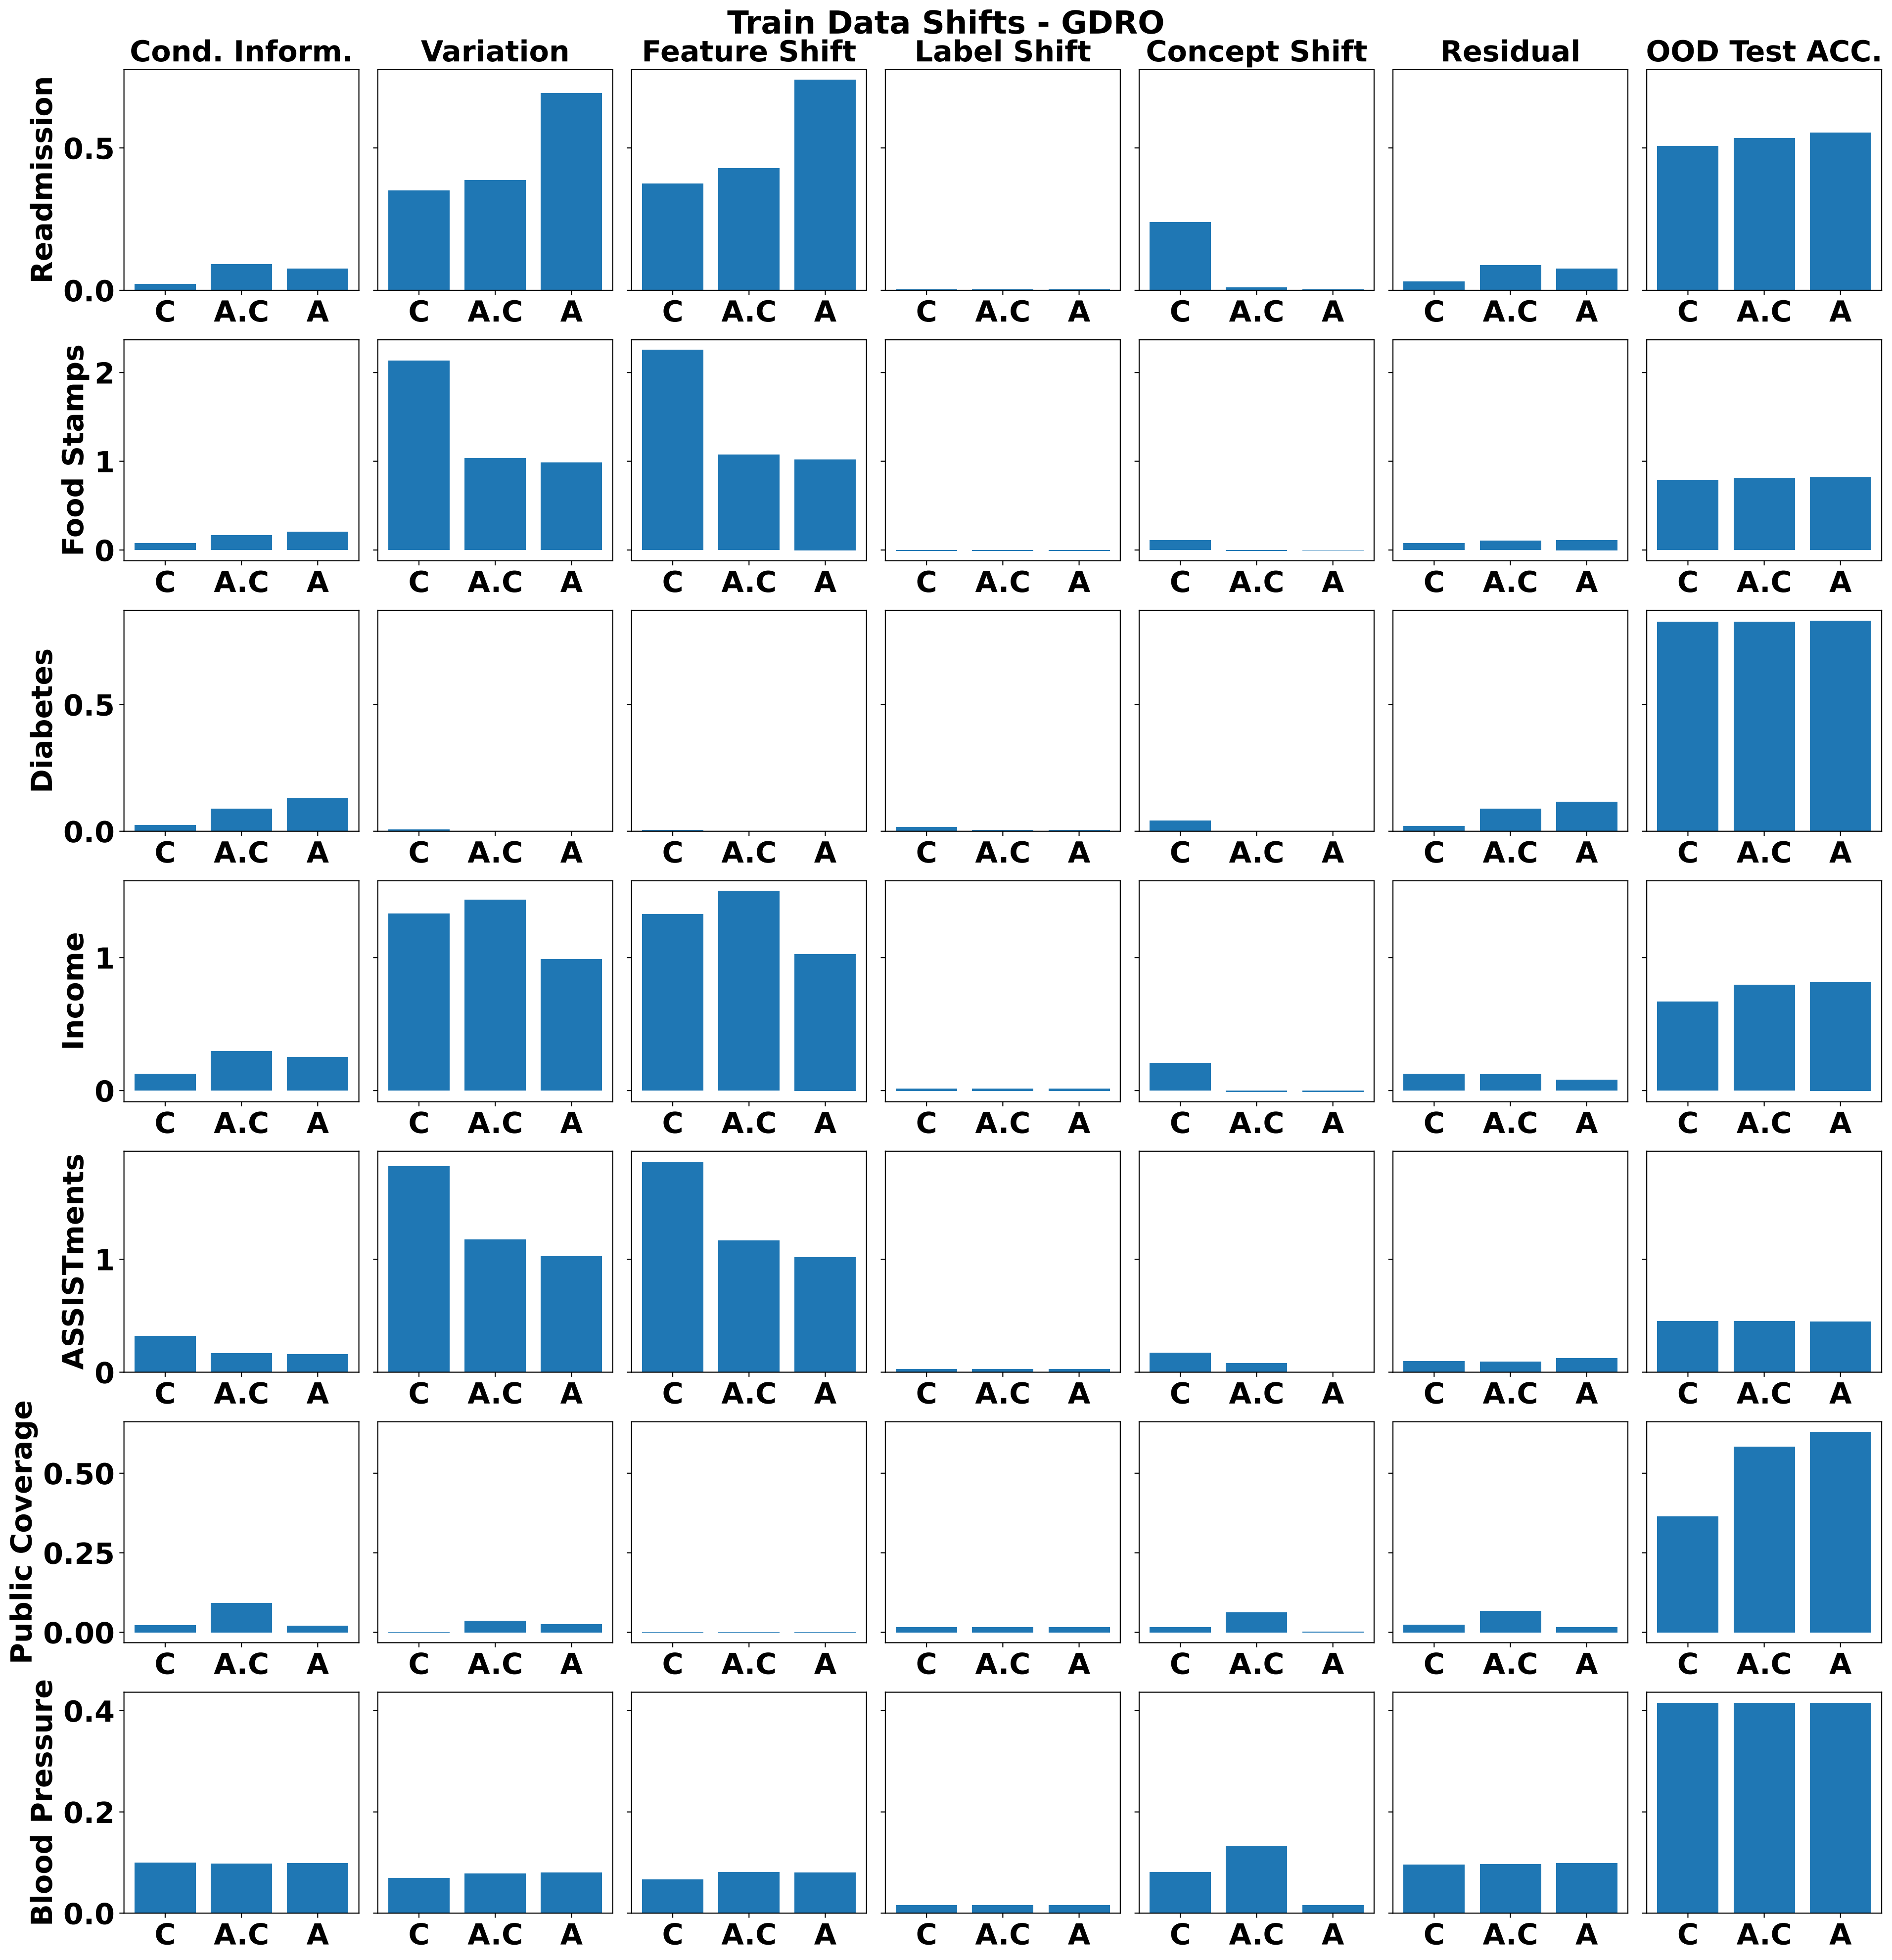

Supplement: supplementary_material [file train_datashifts_group_dro.pdf › code/realworld/results/informative/train_datashifts_group_dro.pdf]

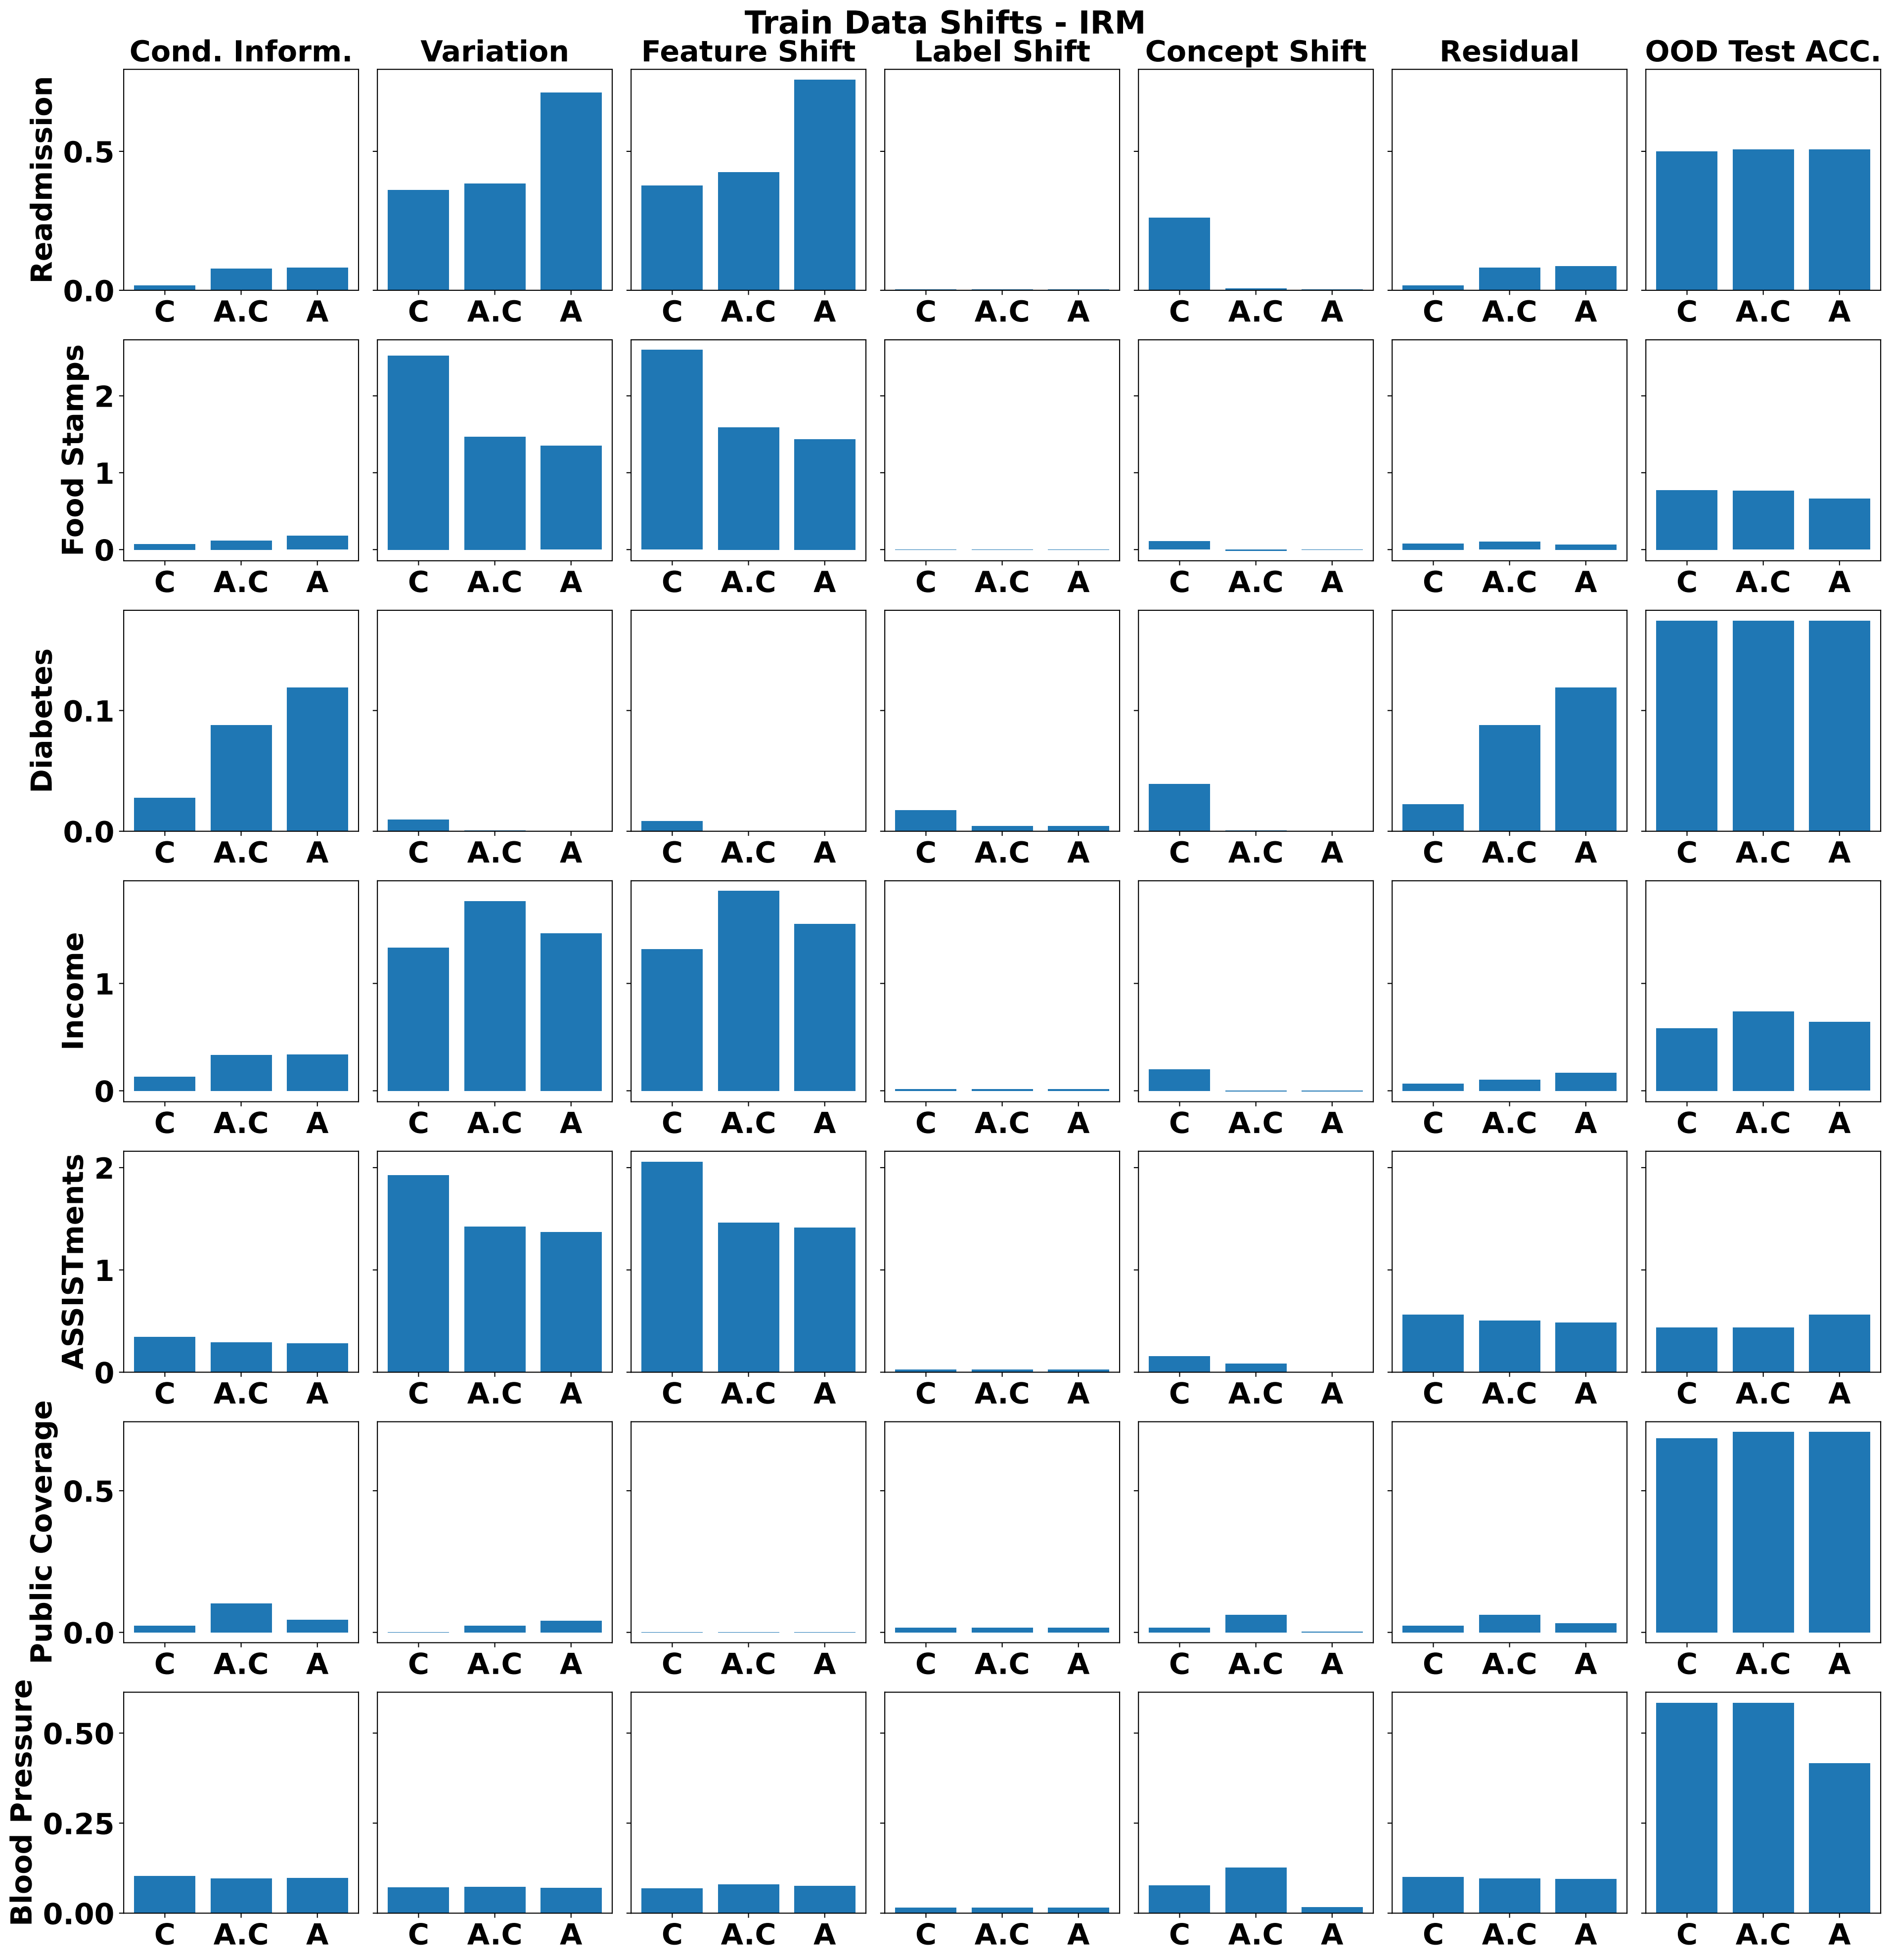

Supplement: supplementary_material [file train_datashifts_irm.pdf › code/realworld/results/informative/train_datashifts_irm.pdf]

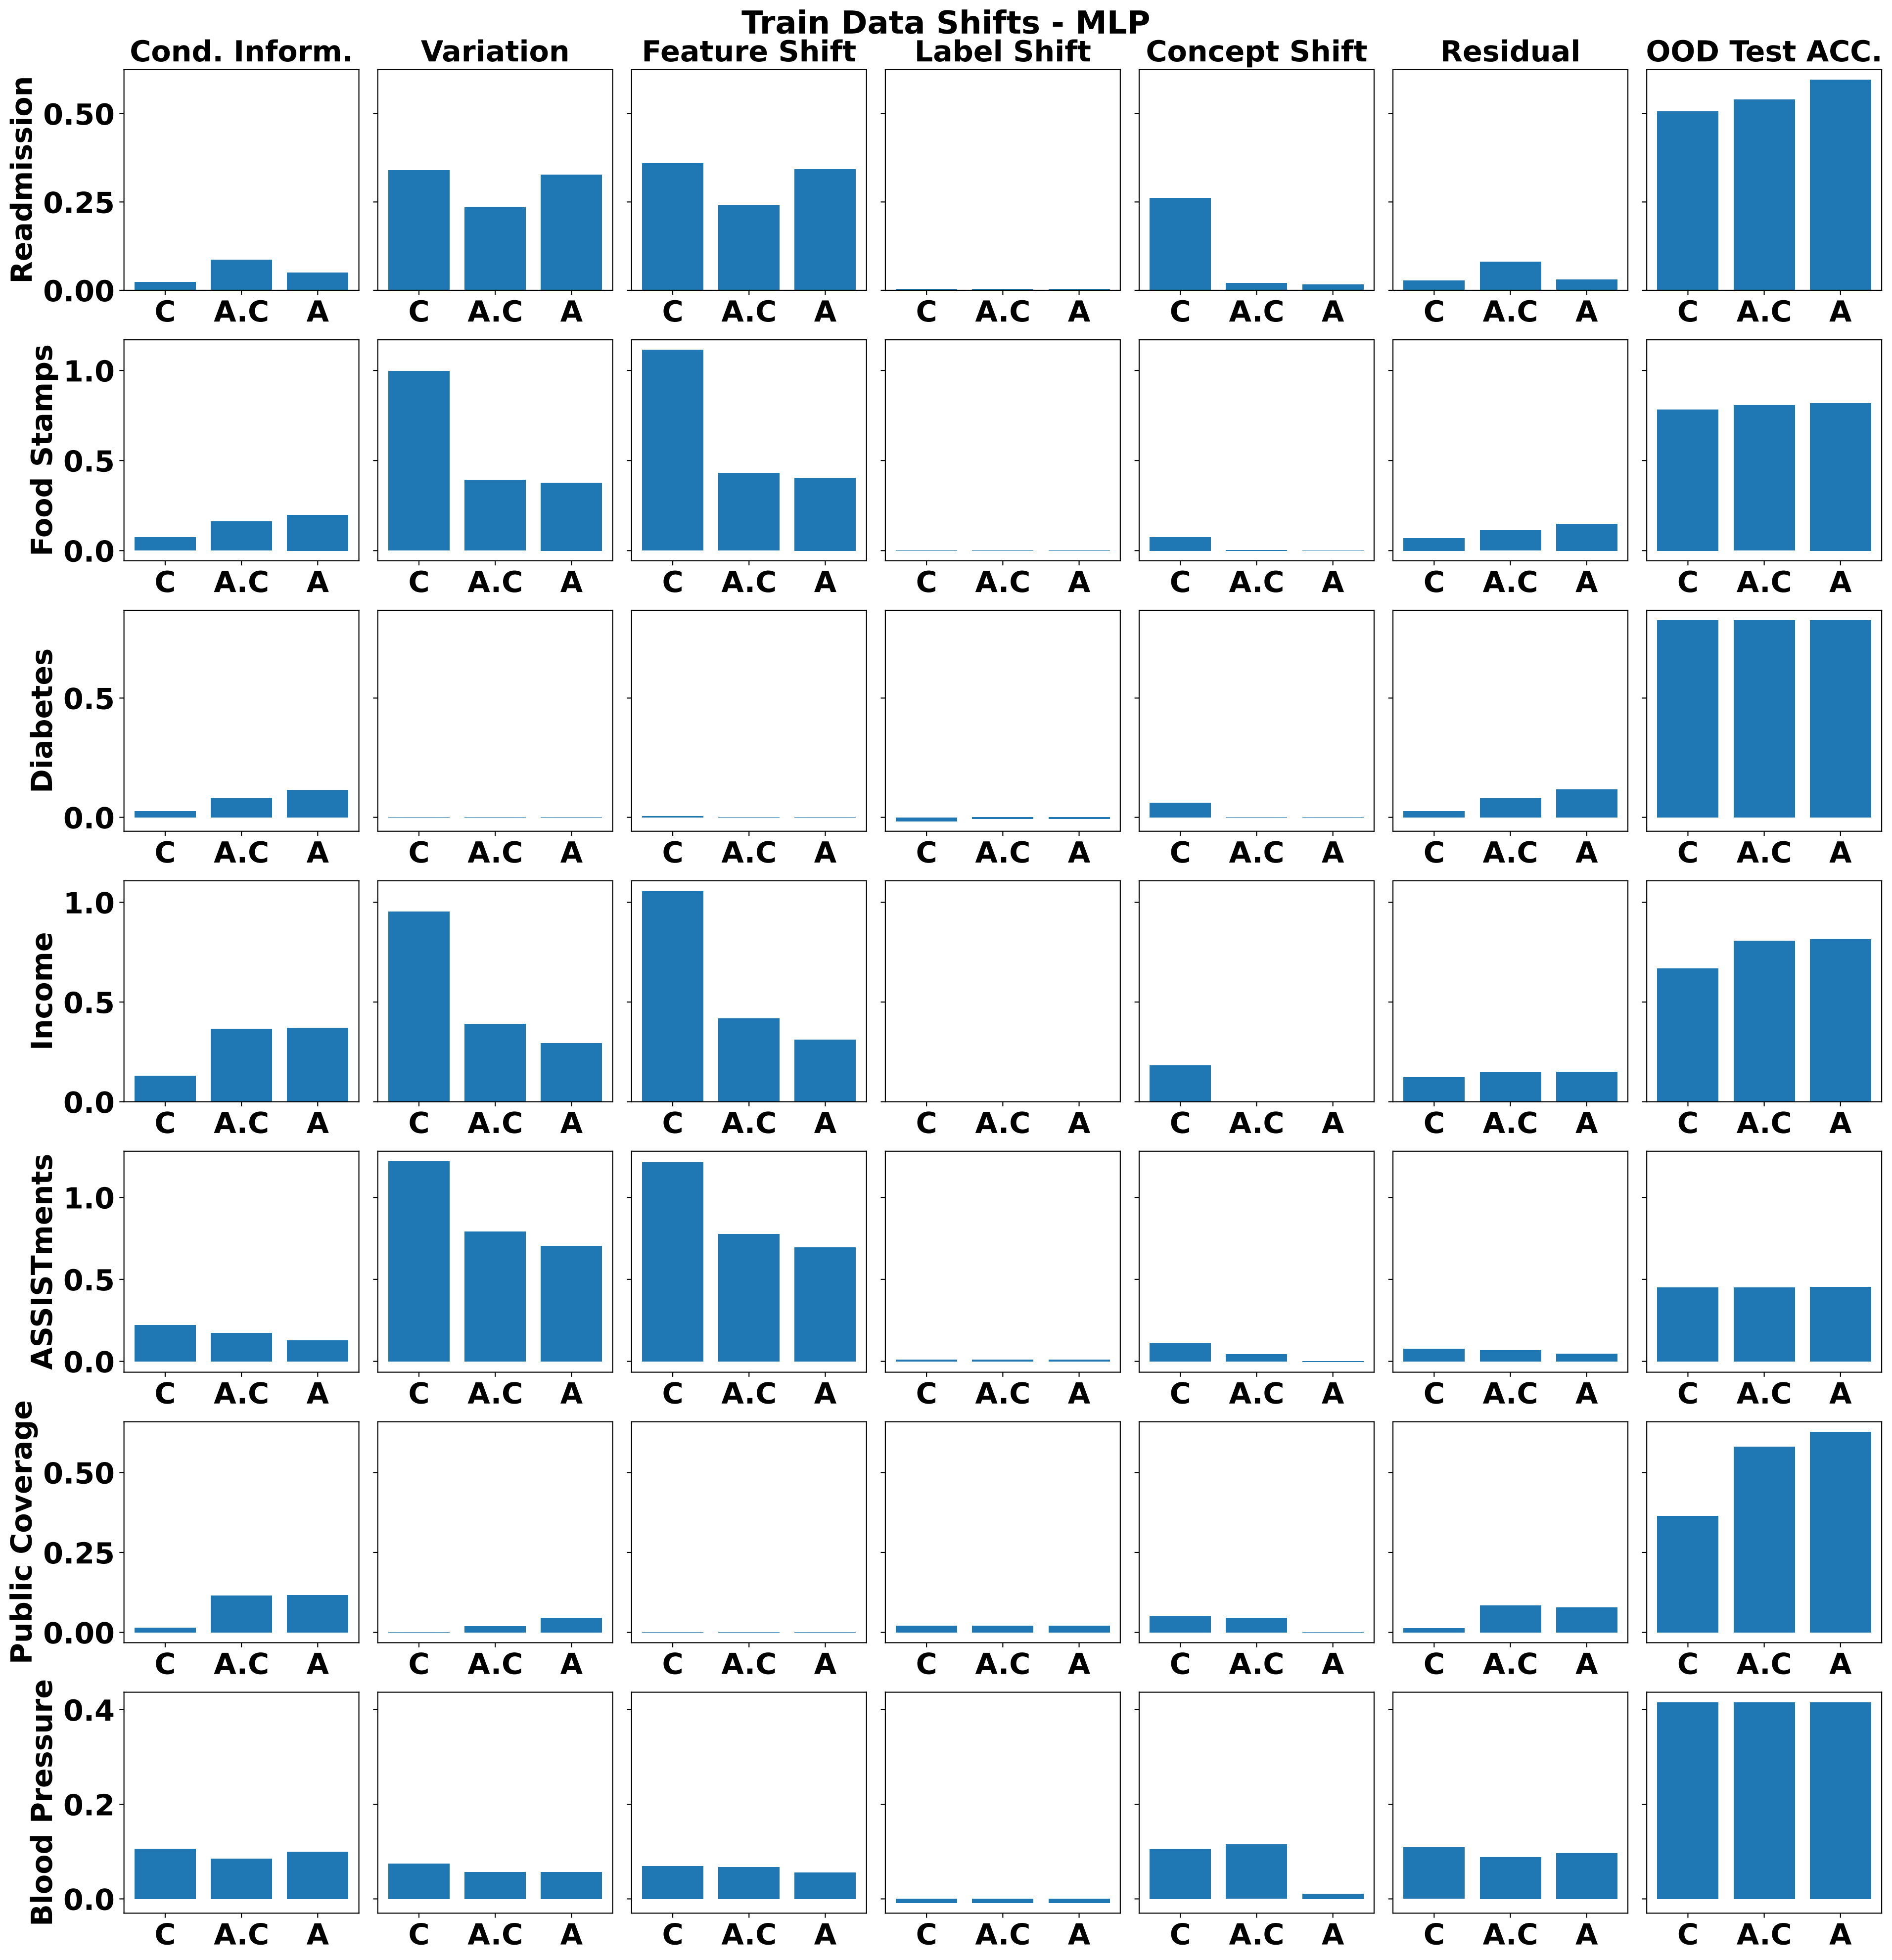

Supplement: supplementary_material [file train_datashifts_mlp.pdf › code/realworld/results/informative/train_datashifts_mlp.pdf]

## Train Data Shifts - VREX

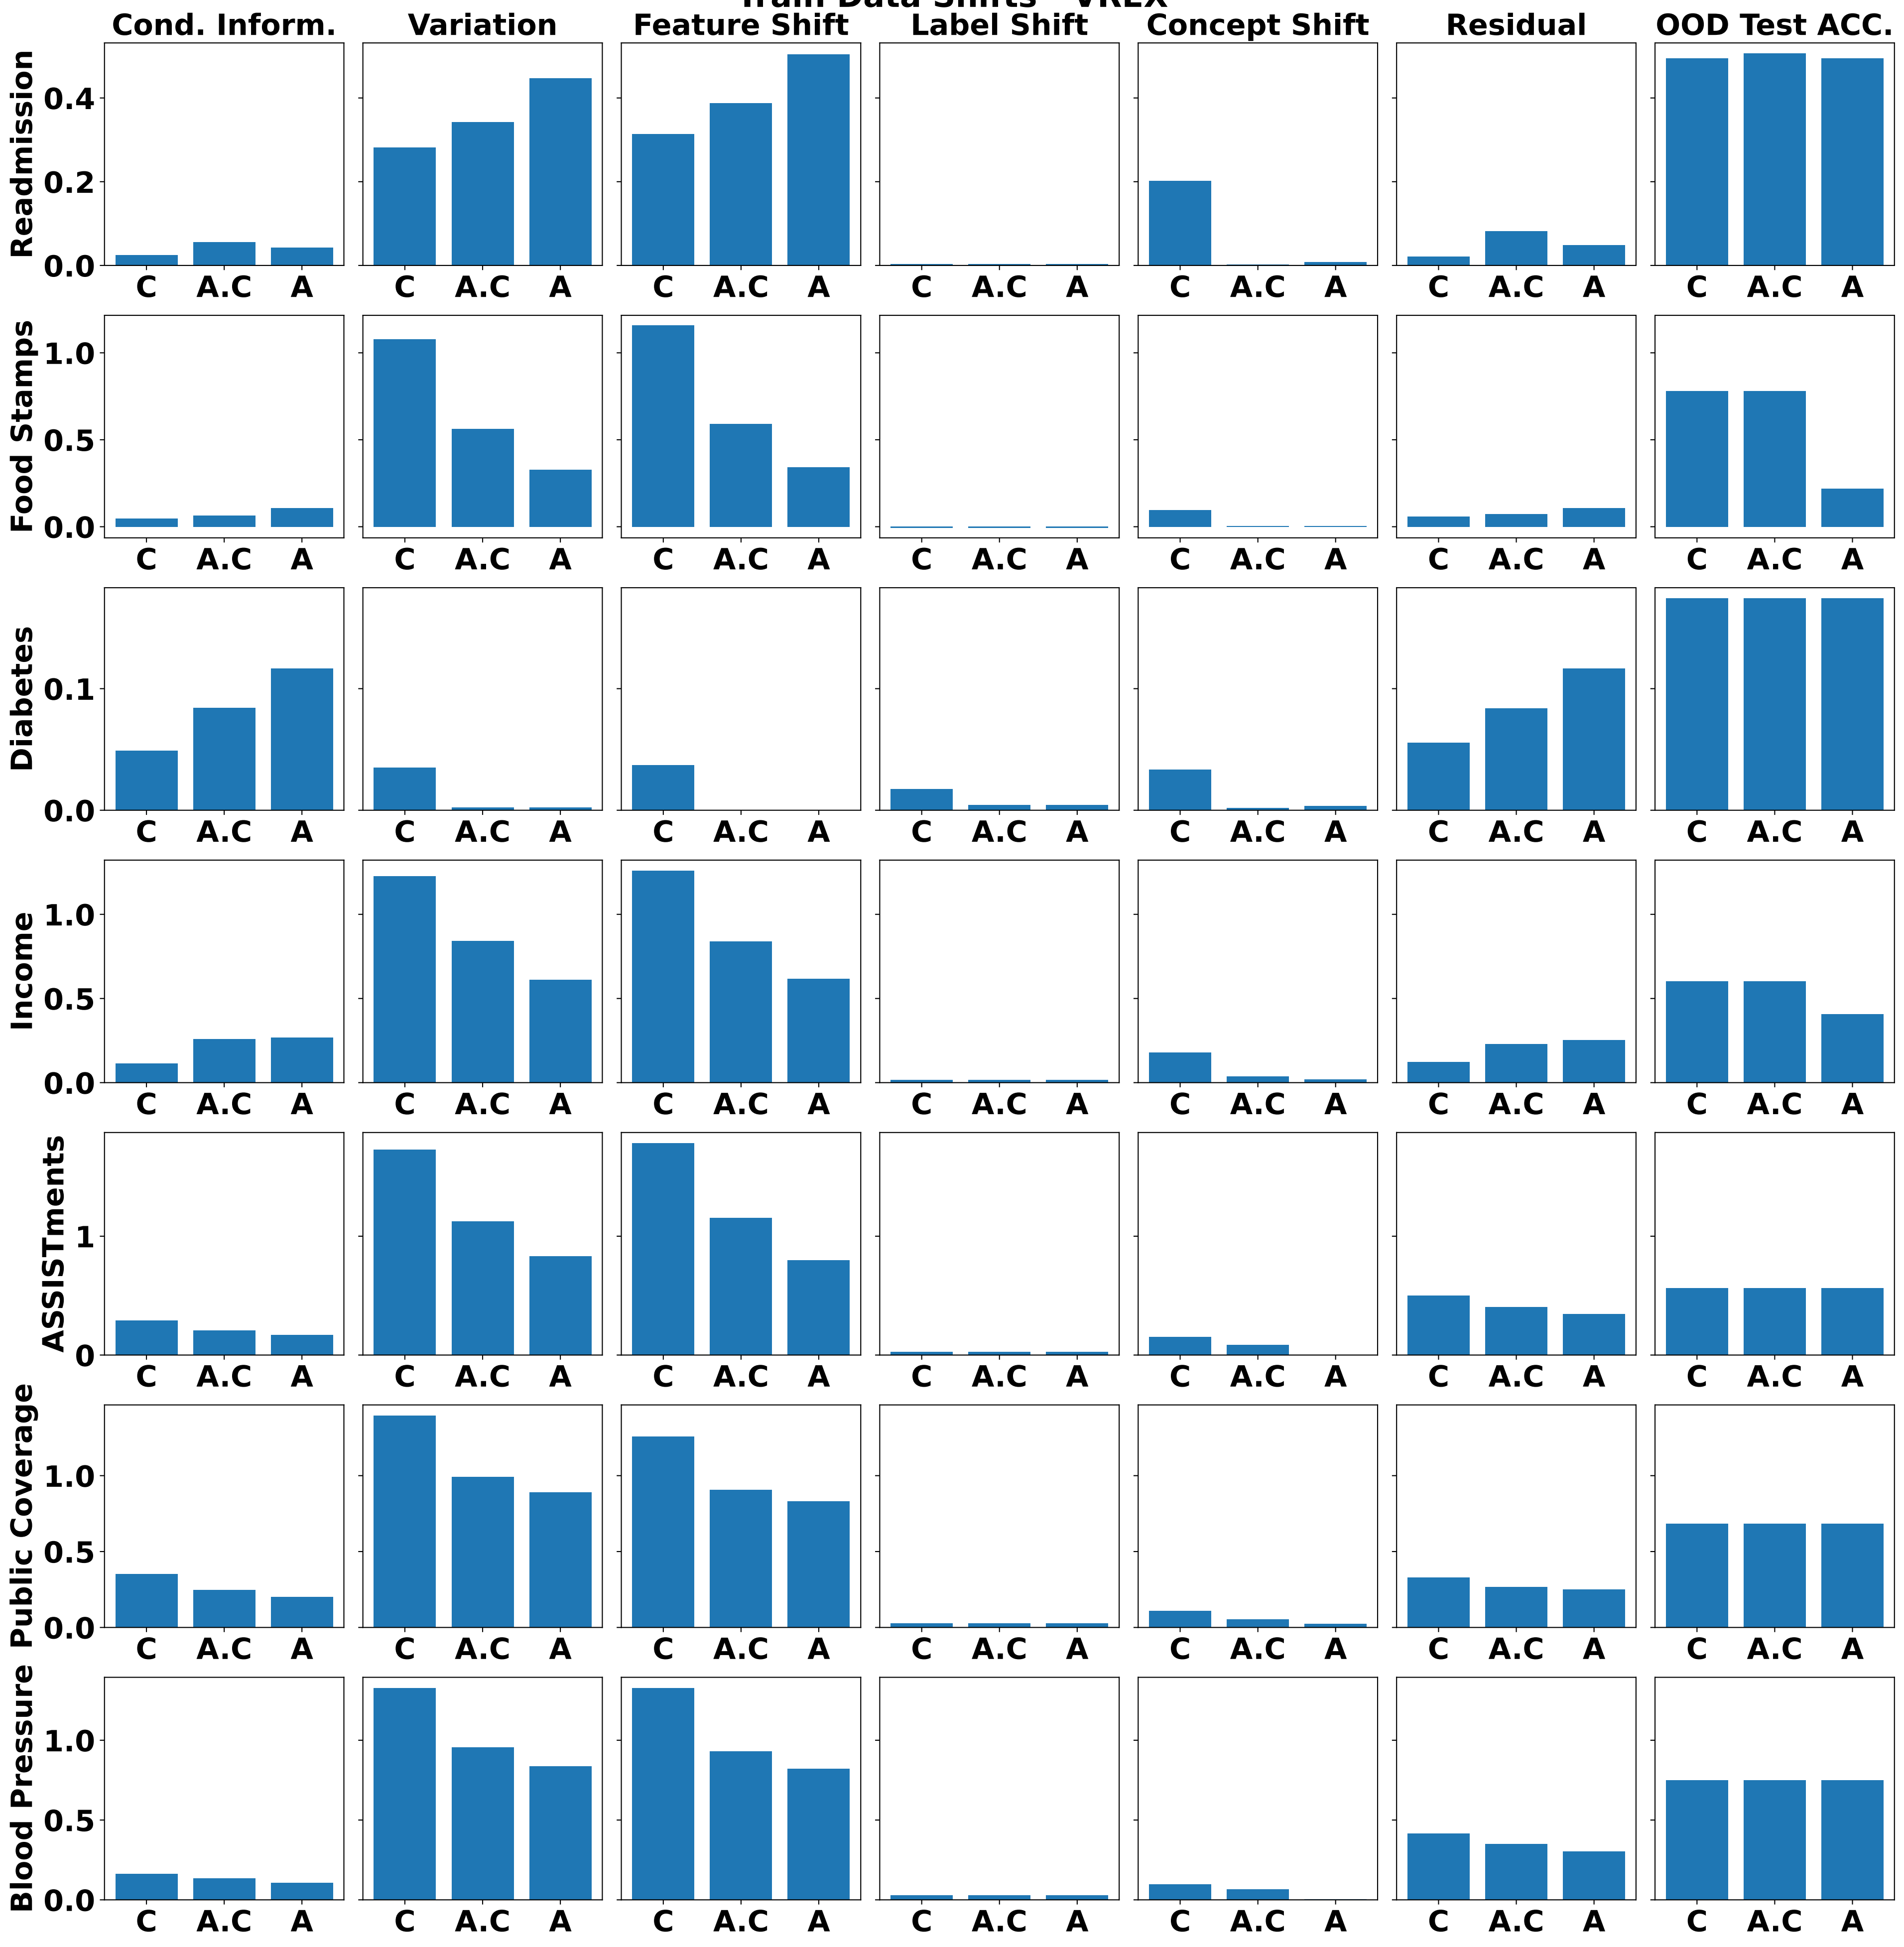

Supplement: supplementary_material [file train_datashifts_vrex.pdf › code/realworld/results/informative/train_datashifts_vrex.pdf]

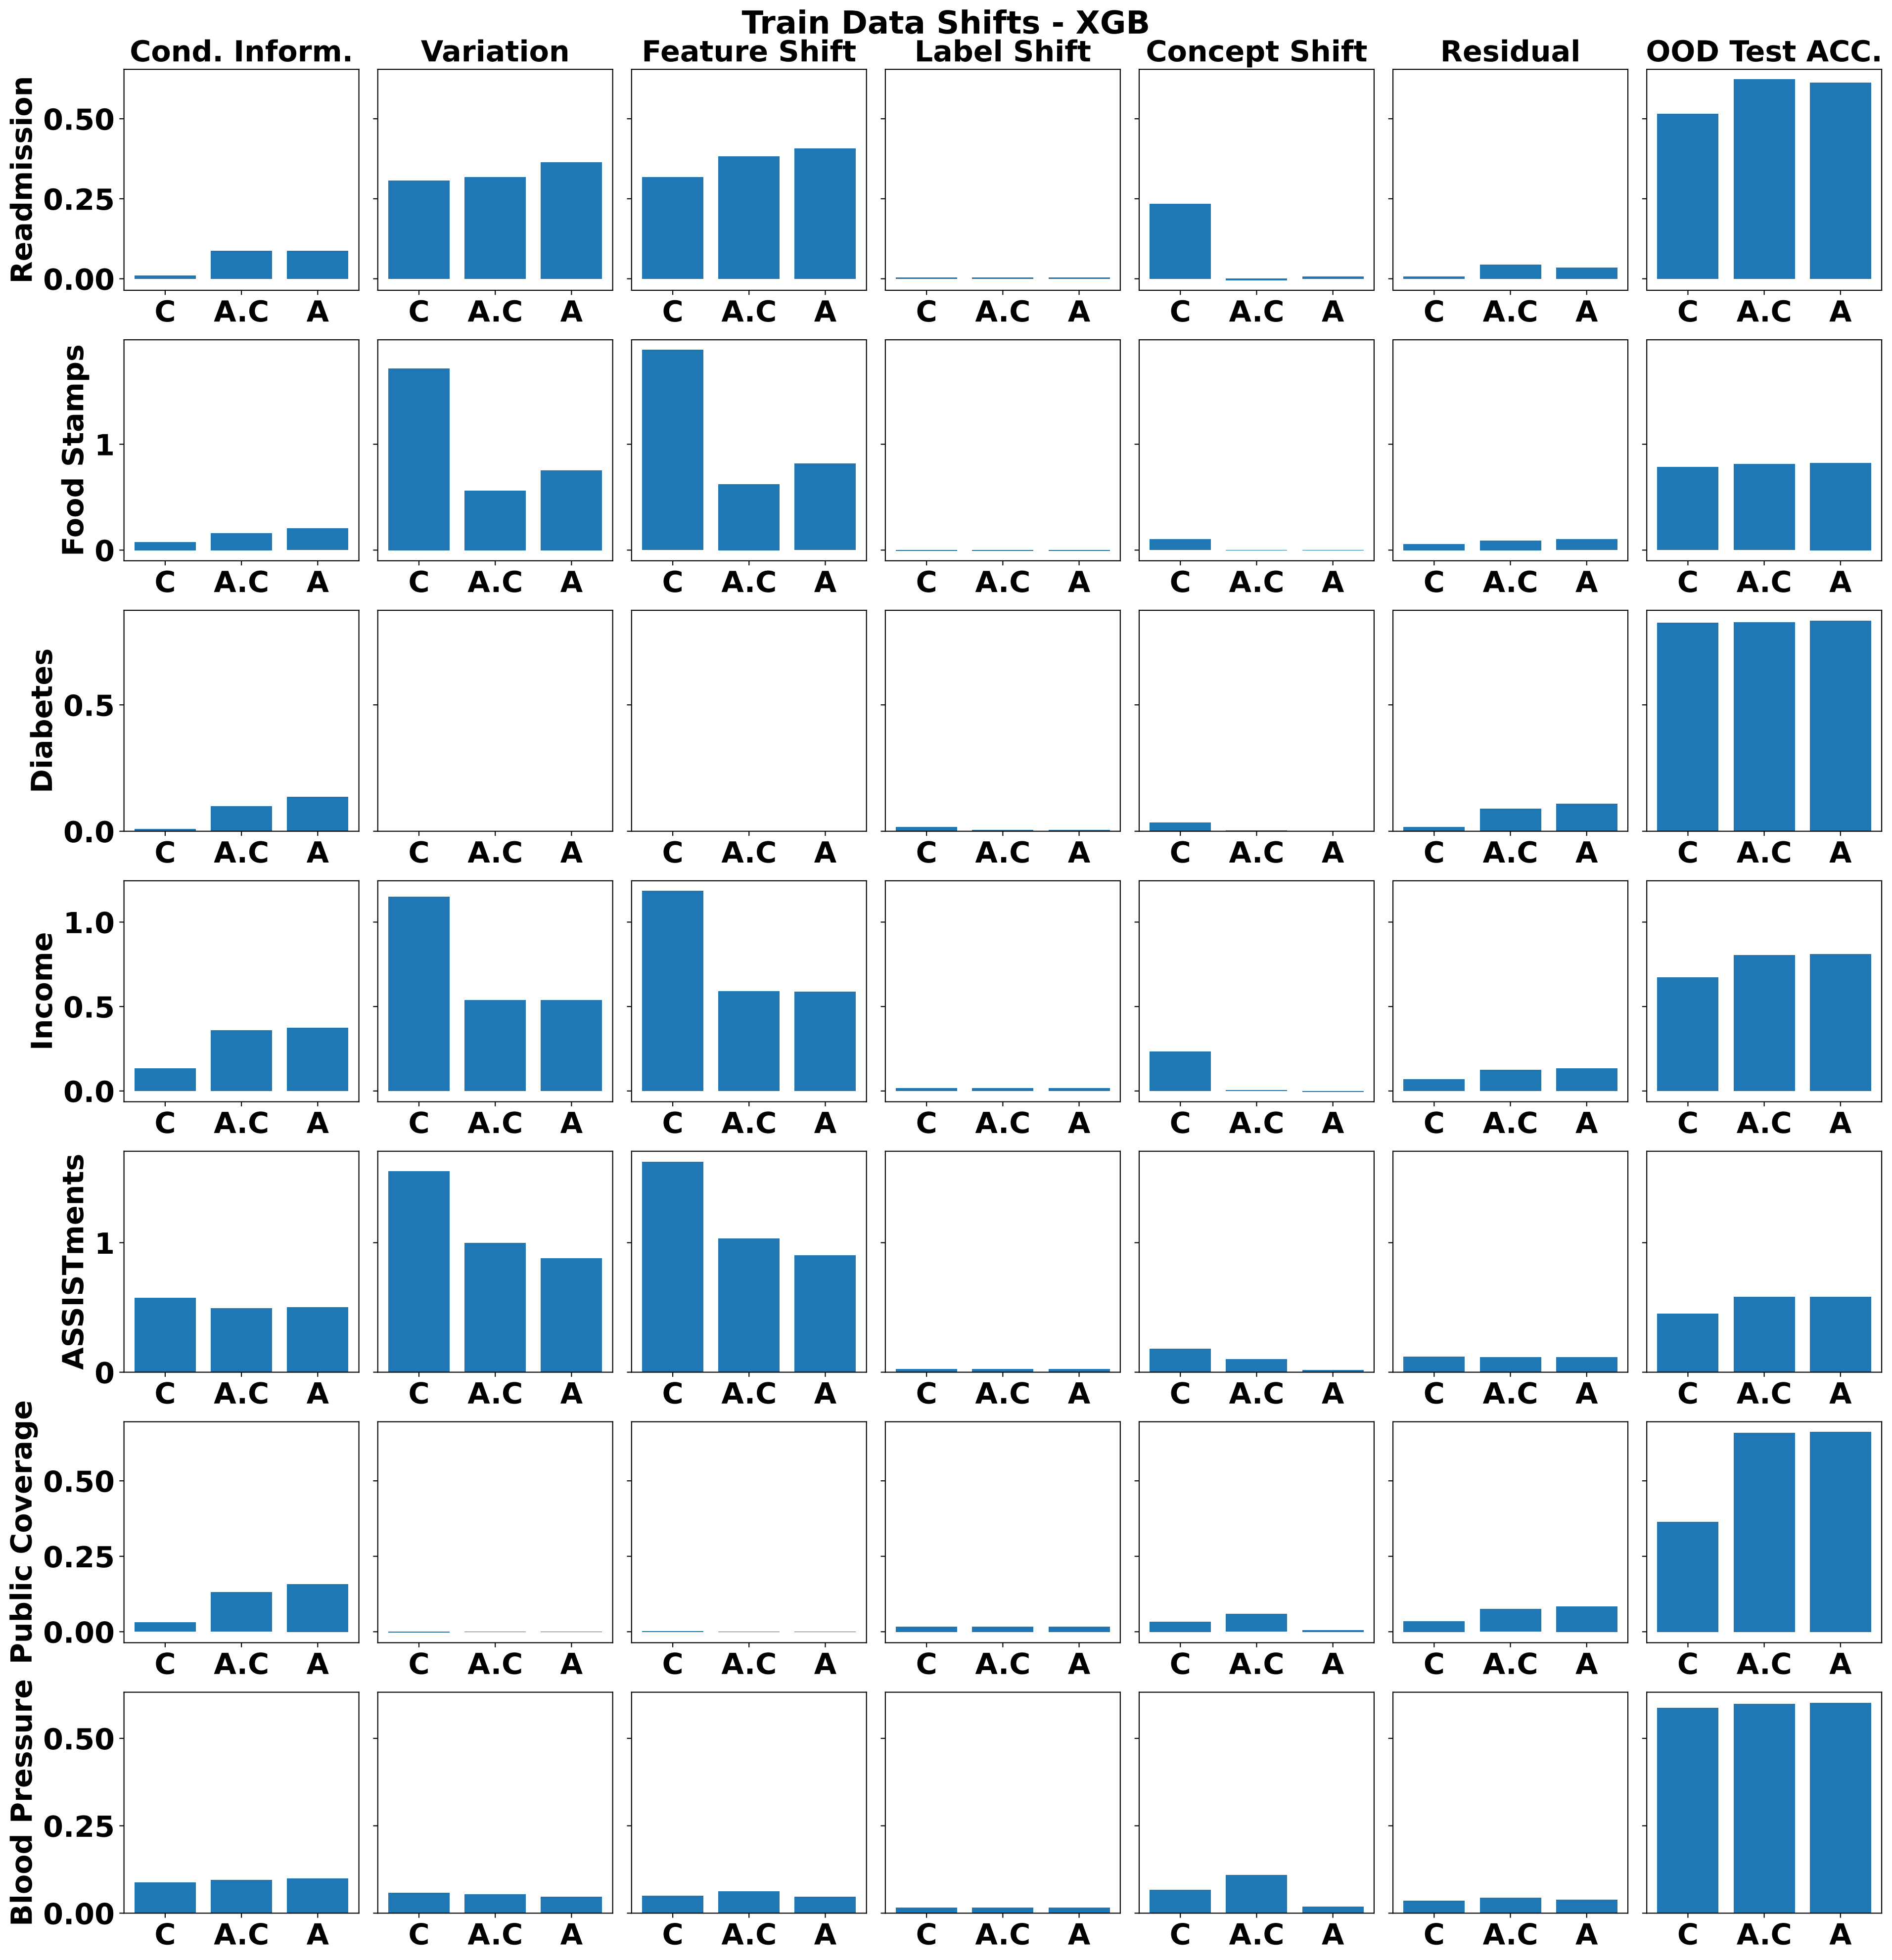

Supplement: supplementary_material [file train_datashifts_xgb.pdf › code/realworld/results/informative/train_datashifts_xgb.pdf]

MI Decomposition Components Comparison

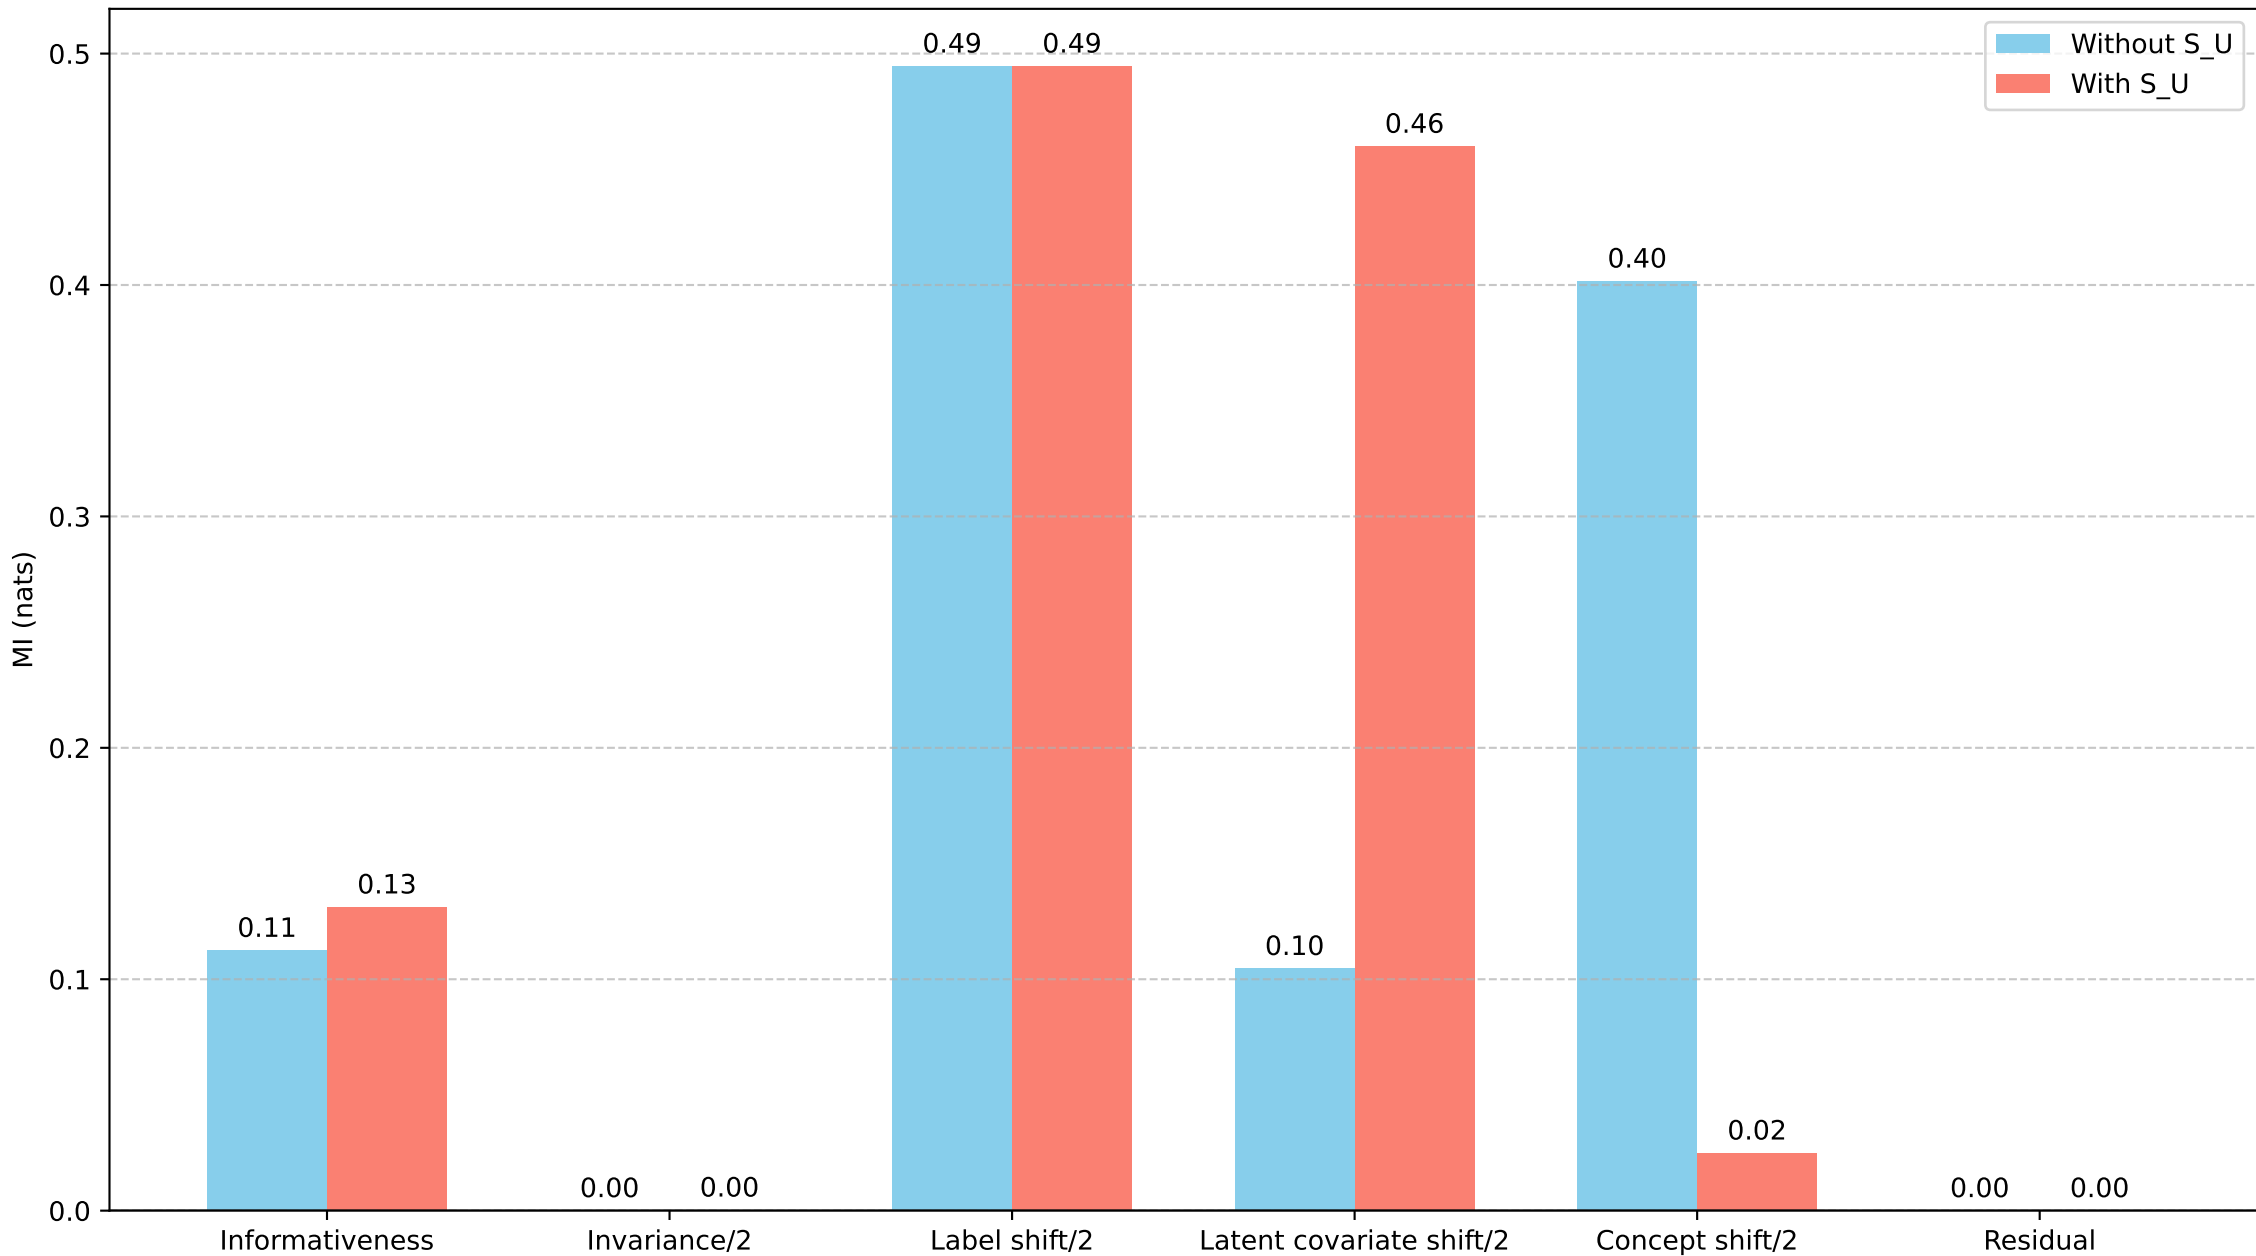

Supplement: supplementary_material [file mi_decomposition_components.pdf › code/realworld/results/mi_decomposition_components.pdf]

Overall MI Comparison

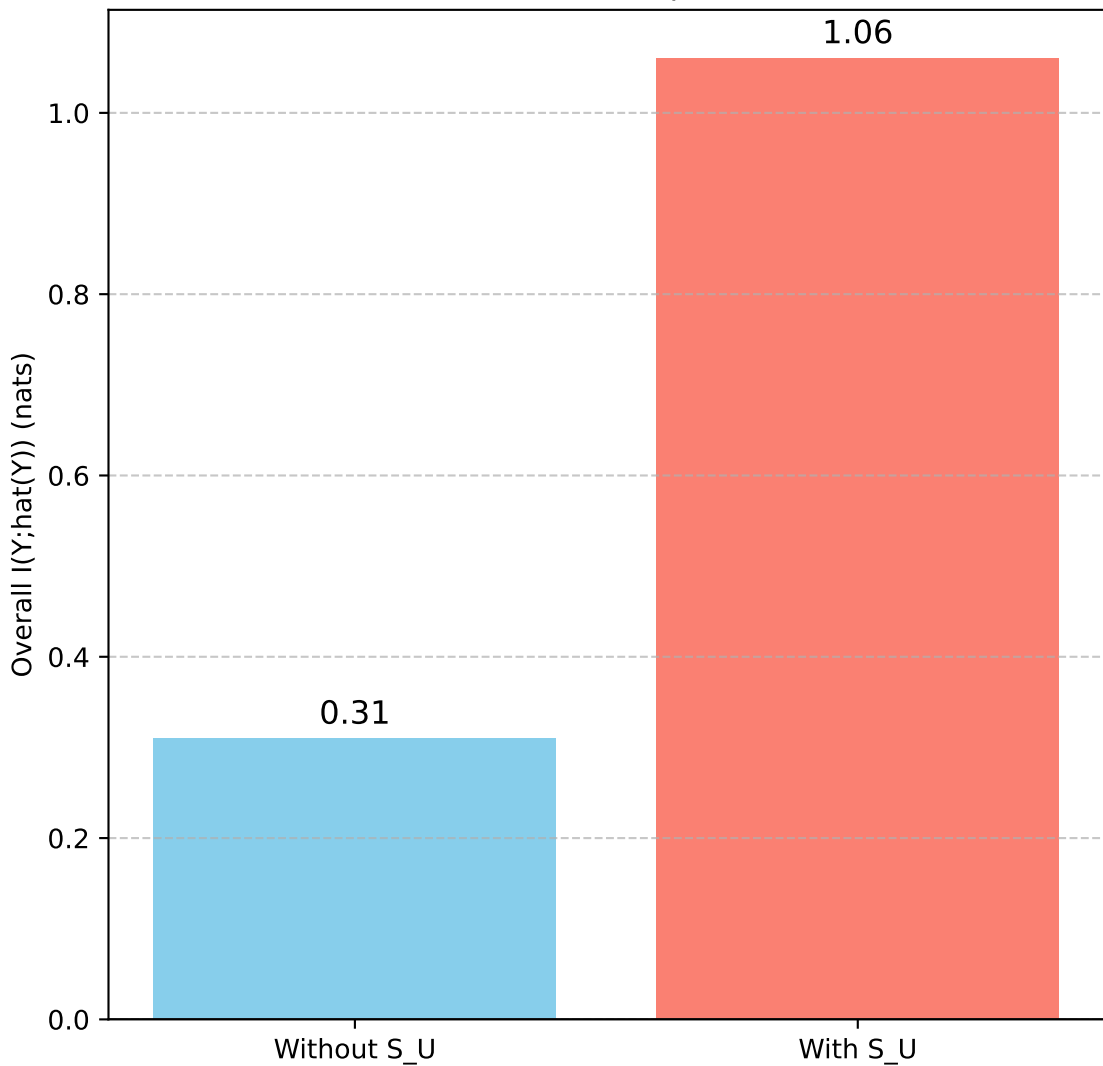

Supplement: supplementary_material [file mi_decomposition_overall.pdf › code/realworld/results/mi_decomposition_overall.pdf]

# Mean Squared Error

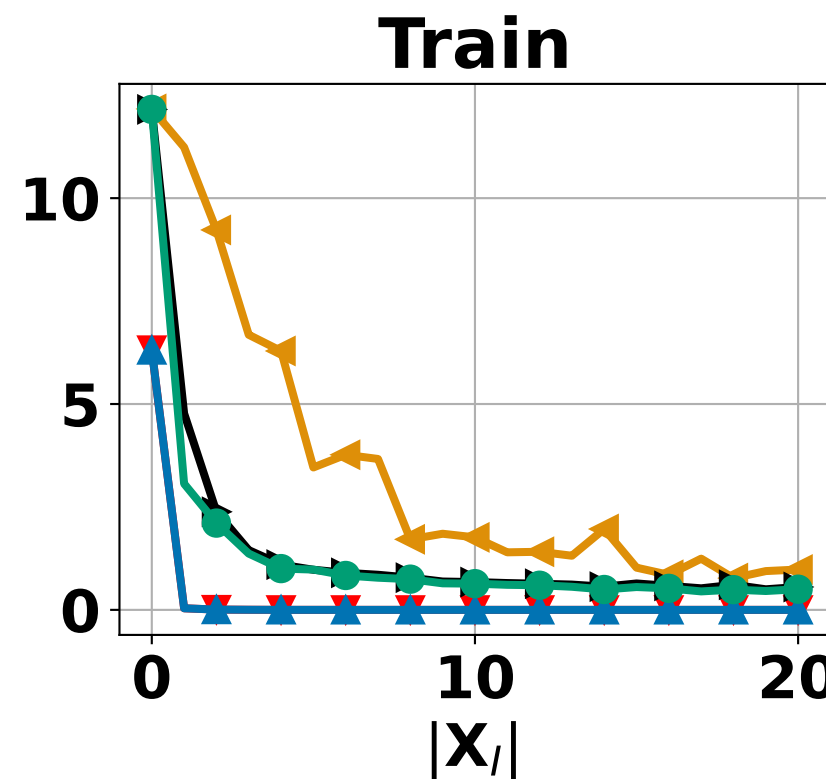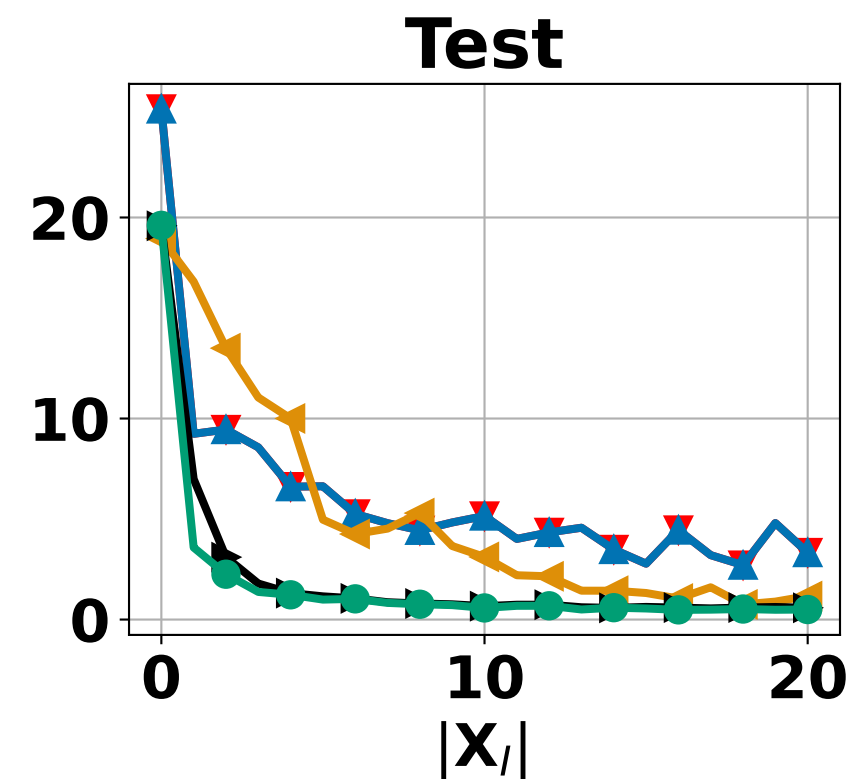

# Cond. Informativeness & Variation

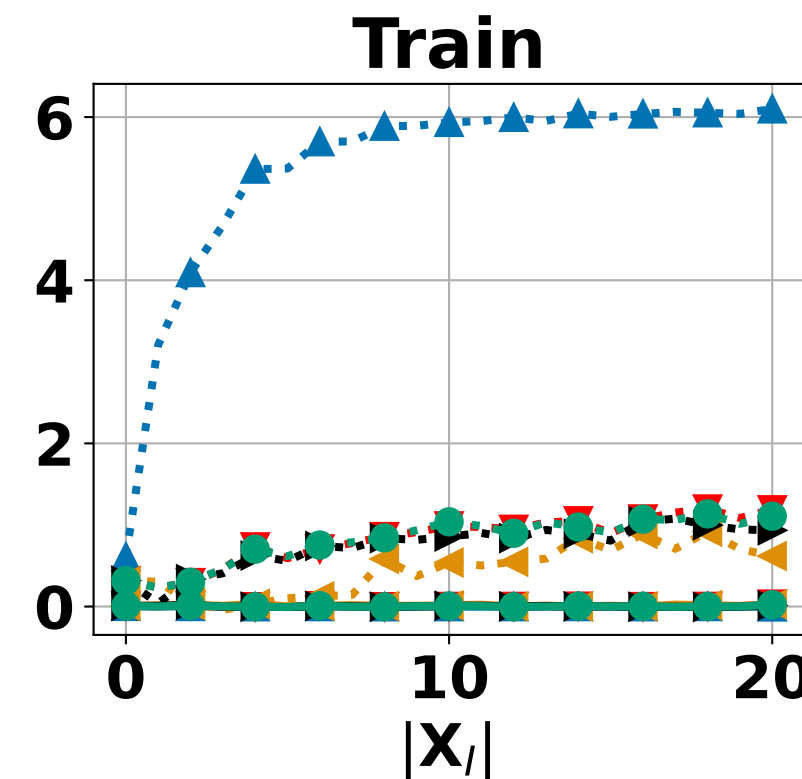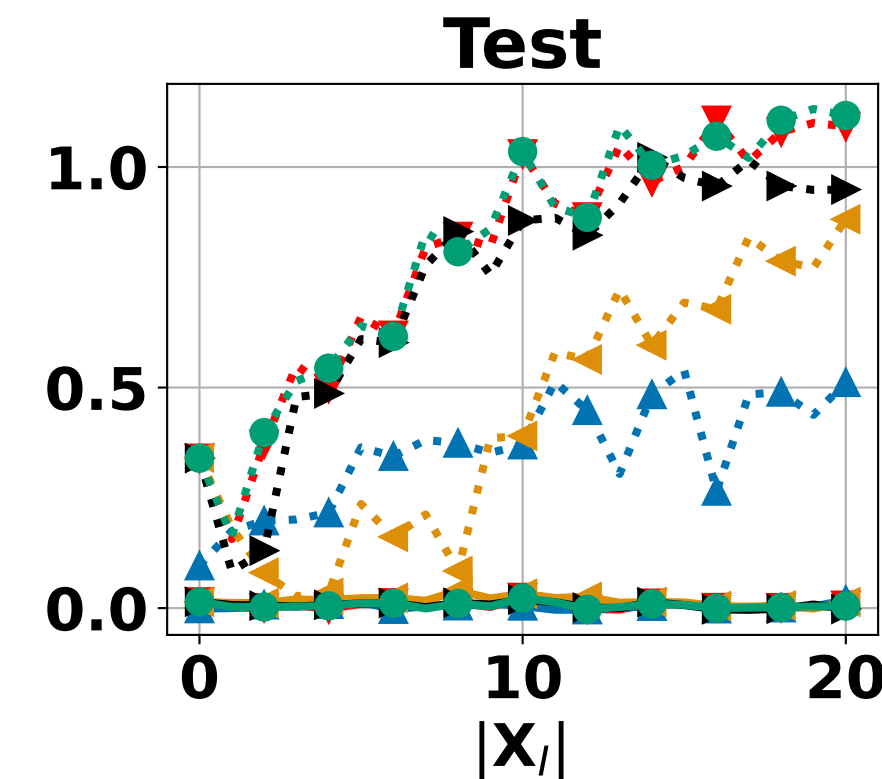

# Feature Shift & Concept Shift

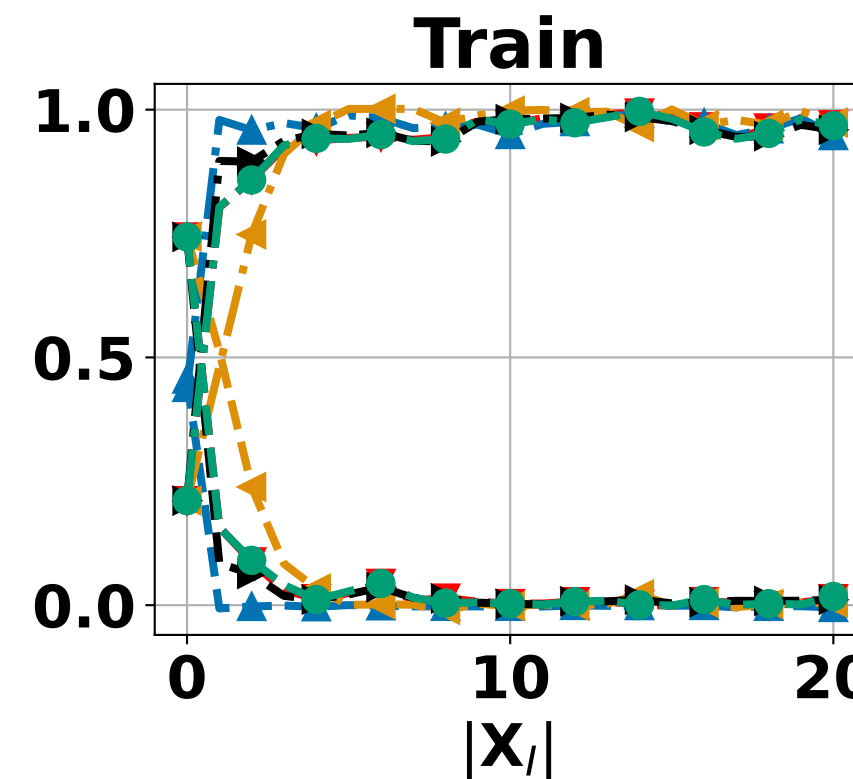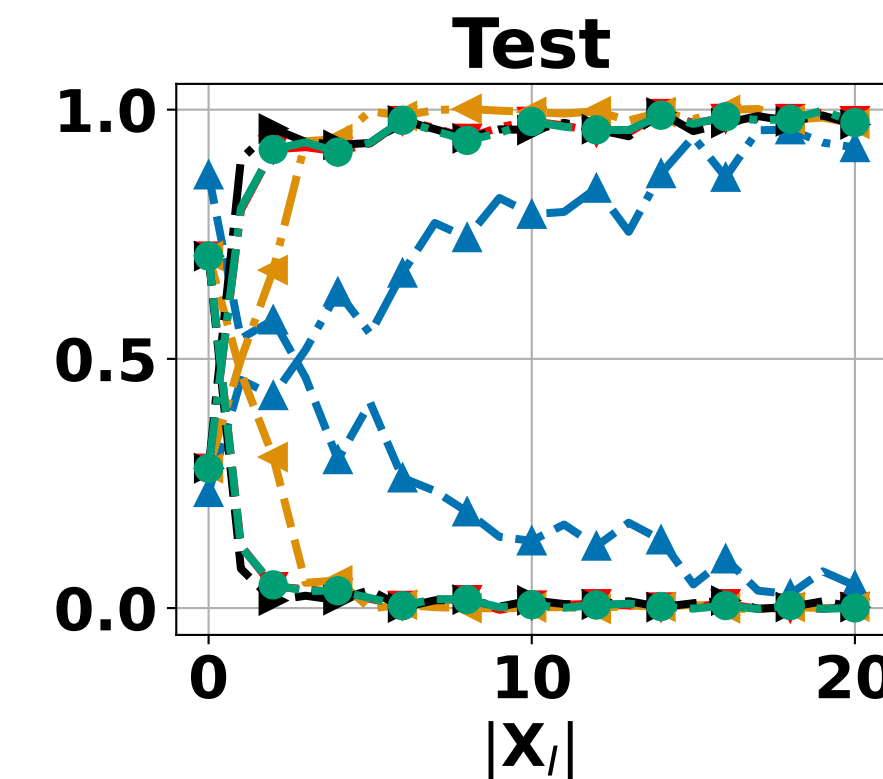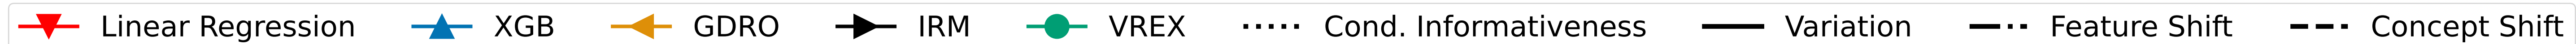

Supplement: supplementary_material [file varyingS.pdf › code/synthetic/results/varyingS.pdf]

# Mean Squared Error

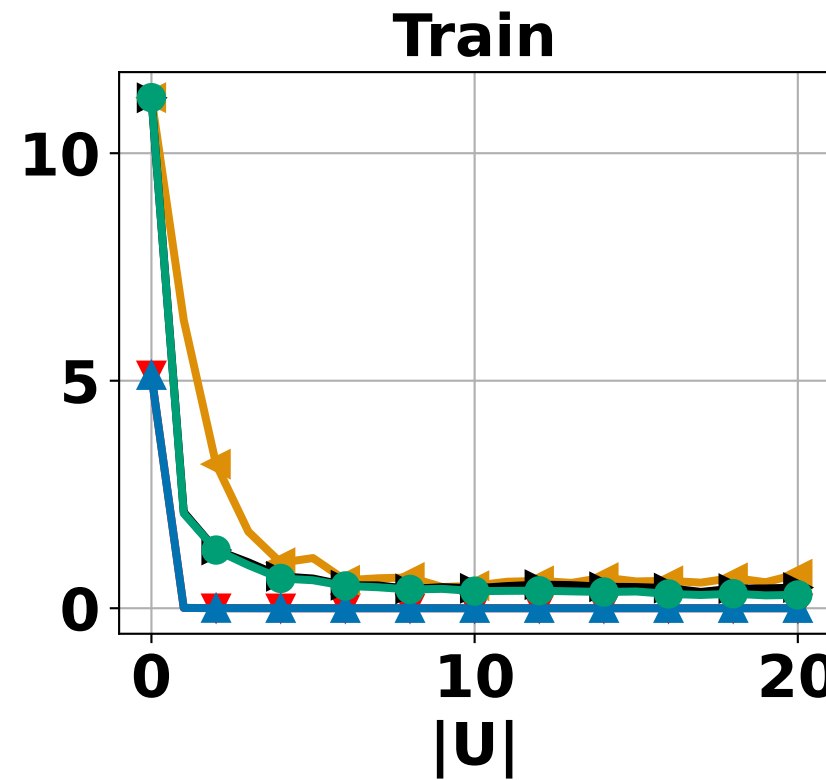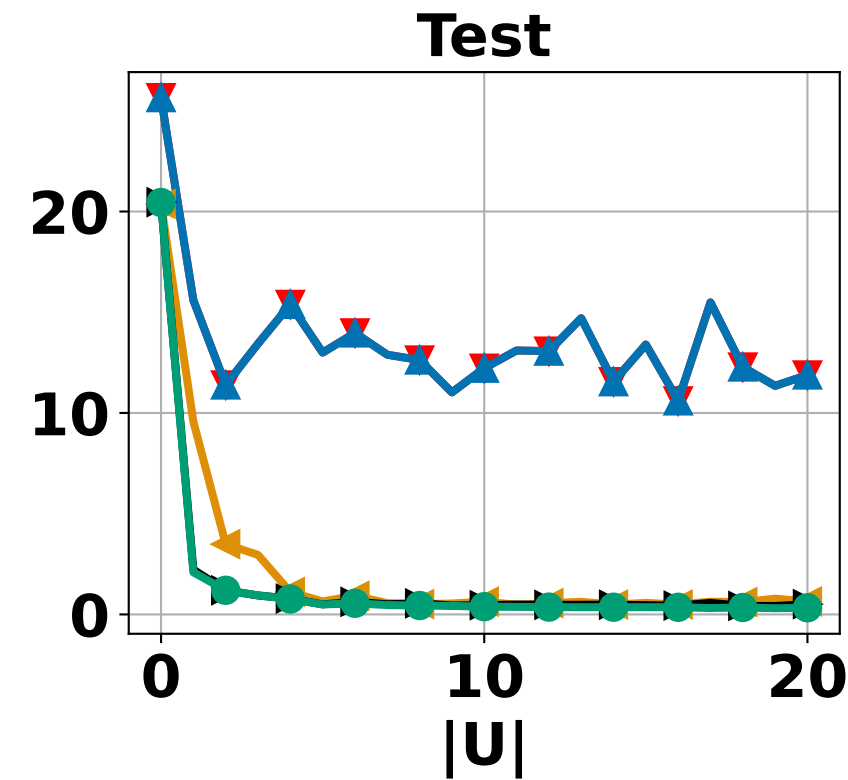

# Cond. Informativeness & Variation

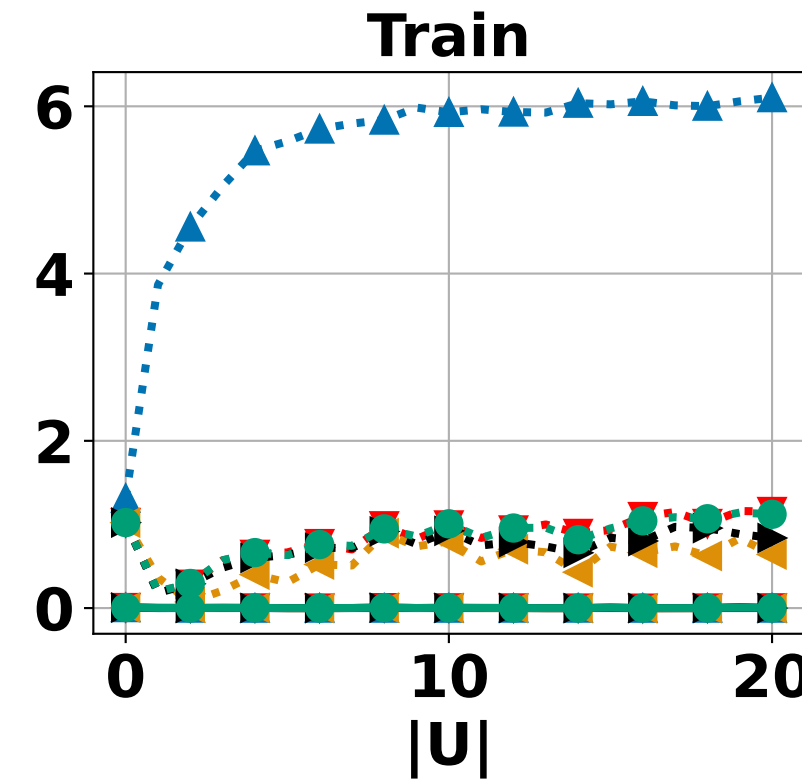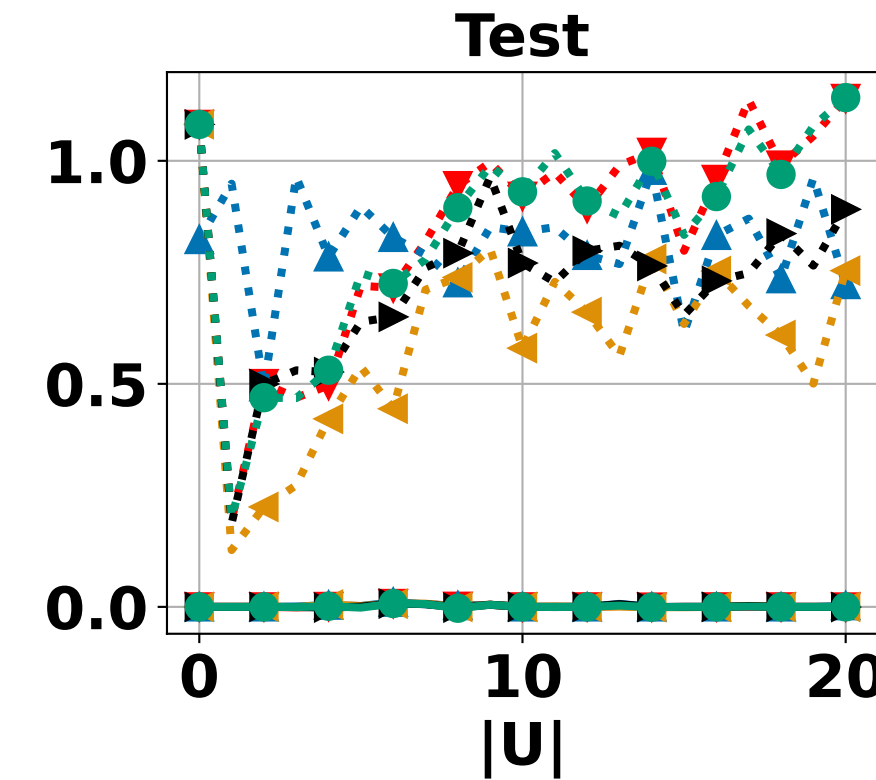

# Feature Shift & Concept Shift

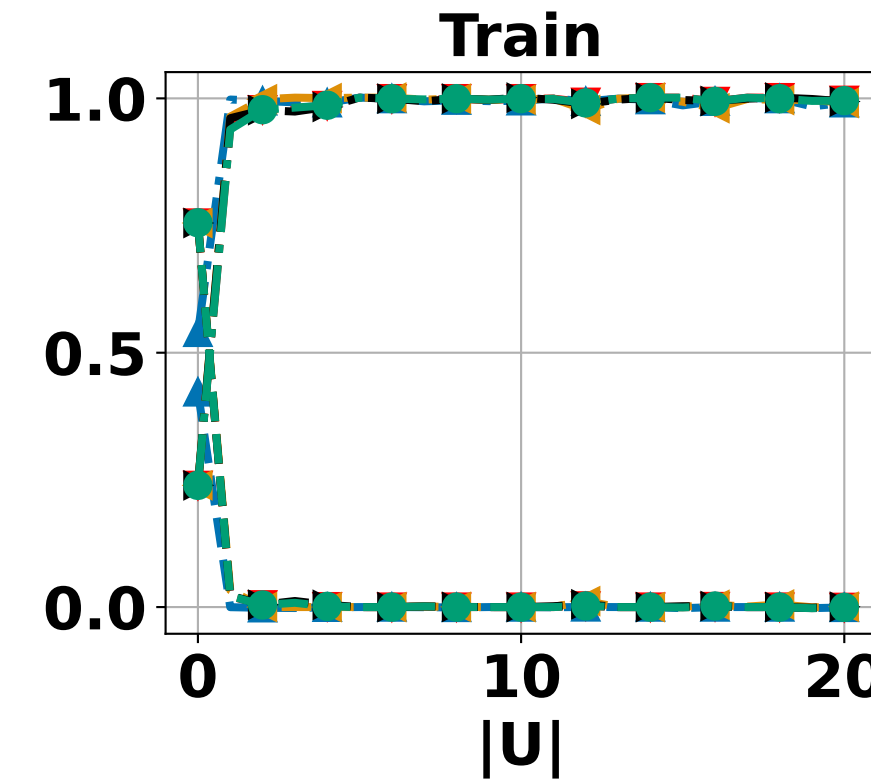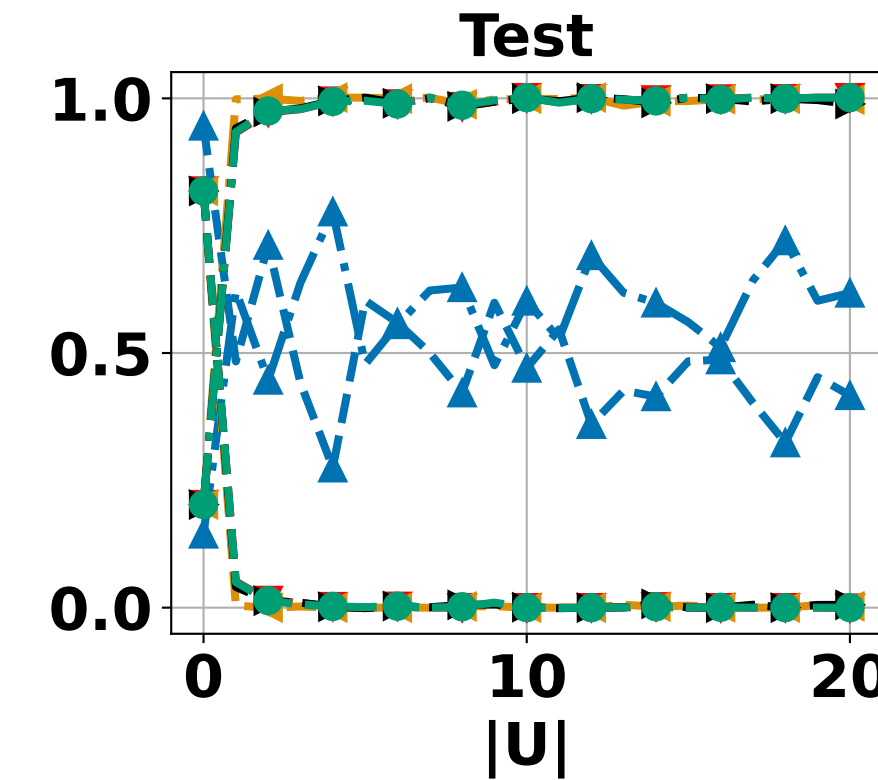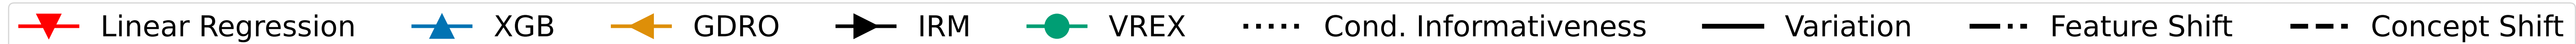

Supplement: supplementary_material [file varyingU.pdf › code/synthetic/results/varyingU.pdf]

# Mean Squared Error

# Cond. Informativeness & Variation

# Feature Shift & Concept Shift

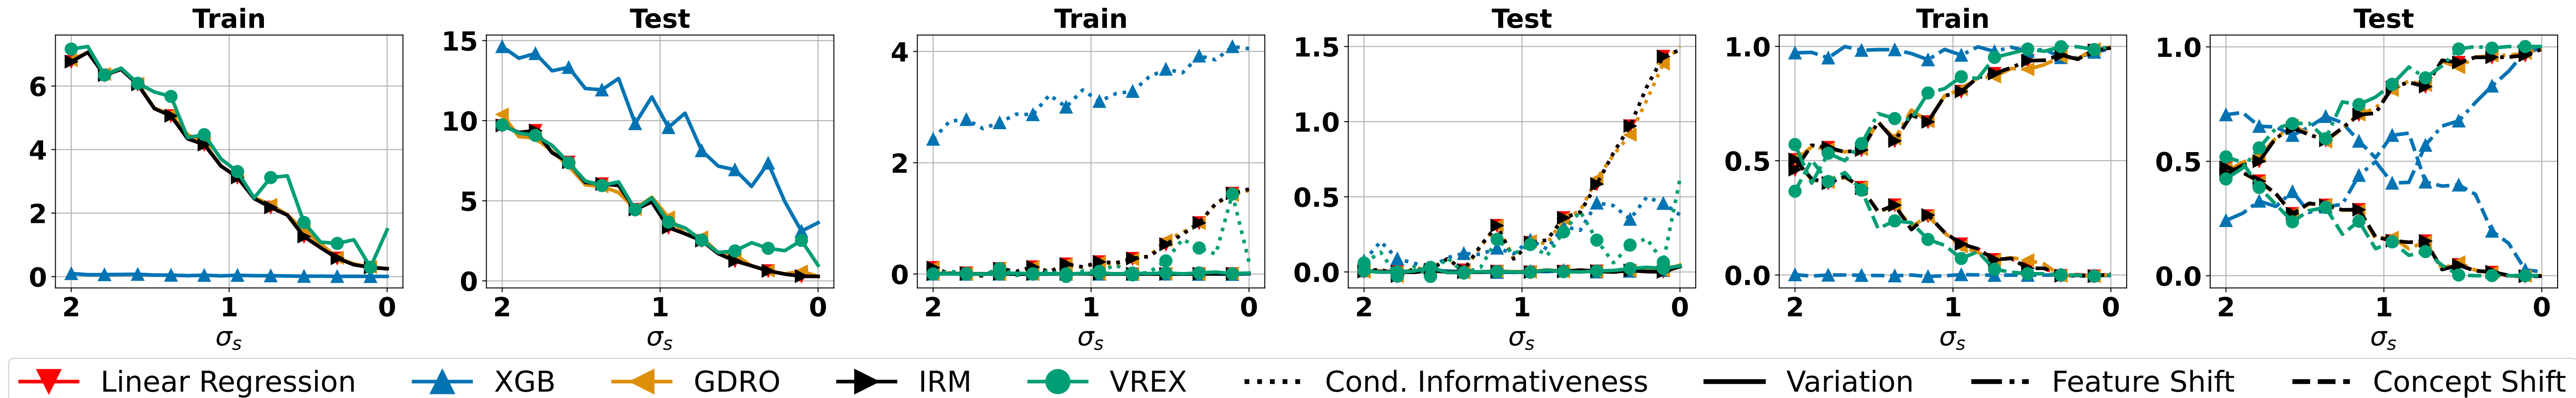

Supplement: supplementary_material [file varyingnoise.pdf › code/synthetic/results/varyingnoise.pdf]
